# Supplementary material for: Design and synthesis of phenylene-bridged isoxazole and tetrazole-1-ol based energetic materials of low sensitivity
Source: Royal Society of Chemistry journal article supplement (doi:10.1039/d3dt00166k), 2023-01-01
Supplement: d3dt00166k1.pdf [file d3dt00166k1.pdf]

# Electronic Supplementary Information For

## **Design and Synthesis of Phenylene- Bridged Isoxazole and Tetrazole-1-ol Based Energetic Materials of Low Sensitivity**

Sohan Lal<sup>a</sup>, Richard J. Staples<sup>b</sup>, Jean'ne M. Shreeve<sup>a\*</sup>

<sup>a</sup>Department of Chemistry, University of Idaho, Moscow,  
Idaho 83844-2343

<sup>b</sup>Department of Chemistry, Michigan State University, East  
Lansing, Michigan 48824

To whom correspondence should be addressed. E-mail:

[jshreeve@uidaho.edu](mailto:jshreeve@uidaho.edu). Fax: +1-208-885-6173

| Entry | Table of Contents                                                                                                                                                                                                                                           | Page |
|-------|-------------------------------------------------------------------------------------------------------------------------------------------------------------------------------------------------------------------------------------------------------------|------|
| 1     | <b>Table S1.</b> Calculated Total Energy ( $E_0$ ), Zero-point Energy (ZPE), values of Thermal Correction (HT) and Enthalpy of Formation ( $\Delta H_f^\circ(\text{g})$ ) of the compounds using B3LYP/6-31+G**//MP2/6-311++G** level of theory (Isodesmic) | S4   |
| 2     | <b>Figure S1:</b> Isodesmic reactions for the title compounds ( <b>4-14</b> )                                                                                                                                                                               | S5   |
| 2     | <b>Table S2.</b> The standard enthalpy of combustion $\Delta H_f$ (combust) for the title compounds                                                                                                                                                         | S6   |
| 3     | <b>Table S3.</b> Computed electrostatic potential (ESP) of RDX and TNT                                                                                                                                                                                      | S6   |
| 4     | <b>Table S4.</b> Crystal data and structure refinement for compound <b>12</b>                                                                                                                                                                               | S7   |
| 5     | <b>Table S5.</b> Fractional Atomic Coordinates ( $\times 10^4$ ) and Equivalent Isotropic Displacement Parameters ( $\text{\AA}^2 \times 10^3$ ) for <b>12</b> . Ueq is defined as 1/3 of the trace of the orthogonalized Uij.                              | S8   |
| 6     | <b>Table S6.</b> Anisotropic Displacement Parameters ( $\times 10^4$ ) for <b>12</b> . The anisotropic displacement factor exponent takes the form: $-2p_2[h_2a^*2 \times U_{11} + 2hka^* \times b^* \times U_{12}]$                                        | S8   |
| 7     | <b>Table S7.</b> Bond Angles in $^\circ$ for compound <b>12</b>                                                                                                                                                                                             | S9   |
| 8     | <b>Table S8.</b> Bond Lengths in $\text{\AA}$ for compound <b>12</b>                                                                                                                                                                                        | S9   |
| 9     | <b>Table S9.</b> Torsion Angles in $^\circ$ for compound <b>12</b>                                                                                                                                                                                          | S10  |
| 10    | <b>Table S10.</b> Hydrogen Fractional Atomic Coordinates ( $\times 10^4$ ) and Equivalent Isotropic Displacement Parameters ( $\text{\AA}^2 \times 10^3$ ) for compound <b>12</b> . Ueq is defined as 1/3 of the trace of the orthogonalised Uij.           | S11  |
| 11    | <b>Table S11.</b> Atomic Occupancies for all atoms in compound <b>12</b>                                                                                                                                                                                    | S11  |
| 12    | <b>Figure S2.</b> FTIR-Spectrum of compound <b>2</b>                                                                                                                                                                                                        | S12  |
| 13    | <b>Figure S3.</b> $^1\text{H}$ NMR Spectrum of compound <b>2</b>                                                                                                                                                                                            | S13  |
| 14    | <b>Figure S4.</b> $^{13}\text{C}$ NMR Spectrum of compound <b>2</b>                                                                                                                                                                                         | S14  |
| 15    | <b>Figure S5.</b> $^{13}\text{C}$ -DEPT135 NMR spectrum of compound <b>2</b>                                                                                                                                                                                | S15  |
| 16    | <b>Figure S6.</b> DSC of compound <b>2</b> at $5^\circ\text{C min}^{-1}$                                                                                                                                                                                    | S16  |
| 16    | <b>Figure S7.</b> FTIR-Spectrum of compound <b>3</b>                                                                                                                                                                                                        | S17  |
| 17    | <b>Figure S8.</b> $^1\text{H}$ NMR Spectrum of compound <b>3</b>                                                                                                                                                                                            | S18  |
| 18    | <b>Figure S9.</b> $^{13}\text{C}$ NMR Spectrum of compound <b>3</b>                                                                                                                                                                                         | S19  |
| 19    | <b>Figure S10.</b> FTIR-Spectrum of compound <b>4</b>                                                                                                                                                                                                       | S20  |
| 20    | <b>Figure S11.</b> $^1\text{H}$ NMR Spectrum of compound <b>4</b>                                                                                                                                                                                           | S21  |
| 21    | <b>Figure S12.</b> $^{13}\text{C}$ NMR Spectrum of compound <b>4</b>                                                                                                                                                                                        | S22  |
| 22    | <b>Figure S13.</b> DSC of compound <b>4</b> at $5^\circ\text{C min}^{-1}$                                                                                                                                                                                   | S23  |
| 23    | <b>Figure S14.</b> TGA of compound <b>4</b> at $5^\circ\text{C min}^{-1}$                                                                                                                                                                                   | S24  |
| 24    | <b>Figure S15.</b> FTIR-Spectrum of compound <b>5</b>                                                                                                                                                                                                       | S25  |
| 25    | <b>Figure S16.</b> $^1\text{H}$ NMR Spectrum of compound <b>5</b>                                                                                                                                                                                           | S26  |
| 26    | <b>Figure S17.</b> $^{13}\text{C}$ NMR Spectrum of compound <b>5</b>                                                                                                                                                                                        | S27  |
| 27    | <b>Figure S18.</b> $^{13}\text{C}$ -DEPT135 NMR Spectrum of compound <b>5</b>                                                                                                                                                                               | S28  |
| 28    | <b>Figure S19.</b> DSC of compound <b>5</b> at $5^\circ\text{C min}^{-1}$                                                                                                                                                                                   | S29  |
| 29    | <b>Figure S20.</b> TGA of compound <b>5</b> at $5^\circ\text{C min}^{-1}$                                                                                                                                                                                   | S30  |
| 30    | <b>Figure S21.</b> FTIR-Spectrum of compound <b>6</b>                                                                                                                                                                                                       | S31  |
| 31    | <b>Figure S22.</b> $^1\text{H}$ NMR Spectrum of compound <b>6</b>                                                                                                                                                                                           | S32  |
| 32    | <b>Figure S23.</b> $^{13}\text{C}$ NMR Spectrum of compound <b>6</b>                                                                                                                                                                                        | S33  |
| 33    | <b>Figure S24.</b> $^{13}\text{C}$ -DEPT135 NMR Spectrum of compound <b>6</b>                                                                                                                                                                               | S34  |
| 34    | <b>Figure S25.</b> $^{15}\text{N}$ NMR Spectrum of compound <b>6</b>                                                                                                                                                                                        | S35  |
| 35    | <b>Figure S26.</b> DSC of compound <b>6</b> at $5^\circ\text{C min}^{-1}$                                                                                                                                                                                   | S36  |
| 36    | <b>Figure S27.</b> TGA of compound <b>6</b> at $5^\circ\text{C min}^{-1}$                                                                                                                                                                                   | S37  |
| 37    | <b>Figure S28.</b> FTIR-Spectrum of compound <b>7</b>                                                                                                                                                                                                       | S38  |
| 38    | <b>Figure S29.</b> $^1\text{H}$ NMR Spectrum of compound <b>7</b>                                                                                                                                                                                           | S39  |

|    |                                                                                                                 |     |
|----|-----------------------------------------------------------------------------------------------------------------|-----|
| 39 | <b>Figure S30.</b> $^{13}\text{C}$ NMR Spectrum of compound <b>7</b>                                            | S40 |
| 40 | <b>Figure S31.</b> DSC of compound <b>7</b> at $5\text{ }^\circ\text{C min}^{-1}$                               | S41 |
| 41 | <b>Figure S32.</b> TGA of compound <b>7</b> at $5\text{ }^\circ\text{C min}^{-1}$                               | S42 |
| 42 | <b>Figure S33.</b> FTIR-Spectrum of compound <b>8</b>                                                           | S43 |
| 42 | <b>Figure S34.</b> $^1\text{H}$ NMR Spectrum of compound <b>8</b>                                               | S44 |
| 43 | <b>Figure S35.</b> $^{13}\text{C}$ NMR Spectrum of compound <b>8</b>                                            | S45 |
| 44 | <b>Figure S36.</b> $^{13}\text{C}$ -DEPT135 NMR Spectrum of compound <b>8</b>                                   | S46 |
| 45 | <b>Figure S37.</b> $^{15}\text{N}$ NMR Spectrum of compound <b>8</b>                                            | S47 |
| 46 | <b>Figure S38.</b> DSC of compound <b>8</b> at $5\text{ }^\circ\text{C min}^{-1}$                               | S48 |
| 47 | <b>Figure S39.</b> TGA of compound <b>8</b> at $5\text{ }^\circ\text{C min}^{-1}$                               | S49 |
| 48 | <b>Figure S40.</b> FTIR-Spectrum of compound <b>9</b>                                                           | S50 |
| 49 | <b>Figure S41.</b> $^1\text{H}$ NMR Spectrum of compound <b>9</b>                                               | S51 |
| 50 | <b>Figure S42.</b> $^{13}\text{C}$ NMR Spectrum of compound <b>9</b>                                            | S52 |
| 51 | <b>Figure S43.</b> DSC of compound <b>9</b> at $5\text{ }^\circ\text{C min}^{-1}$                               | S53 |
| 52 | <b>Figure S44.</b> TGA of compound <b>9</b> at $5\text{ }^\circ\text{C min}^{-1}$                               | S54 |
| 53 | <b>Figure S45.</b> FTIR-Spectrum of compound <b>11</b>                                                          | S55 |
| 54 | <b>Figure S46.</b> $^1\text{H}$ NMR Spectrum of compound <b>11</b>                                              | S56 |
| 55 | <b>Figure S47.</b> $^{13}\text{C}$ NMR Spectrum of compound <b>11</b>                                           | S57 |
| 56 | <b>Figure S48.</b> $^{13}\text{C}$ -DEPT135 NMR Spectrum of compound <b>11</b>                                  | S58 |
| 57 | <b>Figure S49.</b> DSC of compound <b>11</b> at $5\text{ }^\circ\text{C min}^{-1}$                              | S59 |
| 58 | <b>Figure S50.</b> TGA of compound <b>11</b> at $5\text{ }^\circ\text{C min}^{-1}$                              | S60 |
| 59 | <b>Figure S51.</b> FTIR-Spectrum of compound <b>12</b>                                                          | S61 |
| 60 | <b>Figure S52.</b> $^1\text{H}$ NMR Spectrum of compound <b>12</b>                                              | S62 |
| 61 | <b>Figure S53.</b> $^{13}\text{C}$ NMR Spectrum of compound <b>12</b>                                           | S63 |
| 62 | <b>Figure S54.</b> $^{15}\text{N}$ NMR Spectrum of compound <b>12</b>                                           | S64 |
| 63 | <b>Figure S55.</b> DSC of compound <b>12</b> at $5\text{ }^\circ\text{C min}^{-1}$                              | S65 |
| 64 | <b>Figure S56.</b> TGA of compound <b>12</b> at $5\text{ }^\circ\text{C min}^{-1}$                              | S66 |
| 65 | <b>Figure S57.</b> FTIR-Spectrum of compound <b>13</b>                                                          | S67 |
| 66 | <b>Figure S58.</b> $^1\text{H}$ NMR Spectrum of compound <b>13</b>                                              | S68 |
| 67 | <b>Figure S59.</b> $^{13}\text{C}$ NMR Spectrum of compound <b>13</b>                                           | S69 |
| 68 | <b>Figure S60.</b> $^{13}\text{C}$ -DEPT135 NMR Spectrum of compound <b>13</b>                                  | S70 |
| 69 | <b>Figure S61.</b> FTIR-Spectrum of compound <b>14</b>                                                          | S71 |
| 70 | <b>Figure S62.</b> $^1\text{H}$ NMR Spectrum of compound <b>14</b>                                              | S72 |
| 71 | <b>Figure S63.</b> $^{13}\text{C}$ NMR Spectrum of compound <b>14</b>                                           | S73 |
| 72 | <b>Figure S64.</b> $^{13}\text{C}$ -DEPT135 NMR Spectrum of compound <b>14</b>                                  | S74 |
| 73 | <b>Figure S65.</b> $^{15}\text{N}$ NMR Spectrum of compound <b>14</b>                                           | S75 |
| 74 | <b>Figure S66.</b> DSC of compound <b>14</b> at $5\text{ }^\circ\text{C min}^{-1}$                              | S76 |
| 75 | <b>Figure S67.</b> TGA of compound <b>14</b> at $5\text{ }^\circ\text{C min}^{-1}$                              | S77 |
| 76 | <b>Table S12.</b> Cartesian coordinates (in $\text{\AA}$ ) for the optimized structure of compound <b>4</b>     | S78 |
| 77 | <b>Table S13.</b> Cartesian coordinates (in $\text{\AA}$ ) for the optimized structure of compound <b>4A</b>    | S79 |
| 78 | <b>Table S14.</b> Cartesian coordinates (in $\text{\AA}$ ) for the optimized structure of compound <b>5</b>     | S80 |
| 79 | <b>Table S15.</b> Cartesian coordinates (in $\text{\AA}$ ) for the optimized structure of compound <b>5A</b>    | S81 |
| 80 | <b>Table S16.</b> Cartesian coordinates (in $\text{\AA}$ ) for the optimized structure of compound <b>5B</b>    | S82 |
| 81 | <b>Table S17.</b> Cartesian coordinates (in $\text{\AA}$ ) for the optimized structure of compound <b>12</b>    | S83 |
| 82 | <b>Table S18.</b> Cartesian coordinates (in $\text{\AA}$ ) for the optimized structure of compound <b>12A</b>   | S84 |
| 83 | <b>Table S19.</b> Cartesian coordinates (in $\text{\AA}$ ) for the optimized structure of compound <b>14</b>    | S86 |
| 84 | <b>Table S20.</b> Cartesian coordinates (in $\text{\AA}$ ) for the optimized structure of compound <b>14A</b>   | S87 |
| 85 | <b>Table S21.</b> Cartesian coordinates (in $\text{\AA}$ ) for the optimized structure of compound <b>TNT</b>   | S88 |
| 86 | <b>Table S22.</b> Cartesian coordinates (in $\text{\AA}$ ) for the optimized structure of compound <b>TNT-A</b> | S89 |
| 87 | <b>Table S23.</b> Cartesian coordinates (in $\text{\AA}$ ) for the optimized structure of compound <b>RDX</b>   | S90 |
| 88 | <b>Table S24.</b> Cartesian coordinates (in $\text{\AA}$ ) for the optimized structure of compound <b>RDX-A</b> | S91 |

**Table S1.** Calculated Total Energy ( $E_0$ ), Zero-point Energy (ZPE), values of Thermal Correction ( $H_T$ ) and Enthalpy of Formation ( $\Delta H_f^\circ(g)$ ) of the compounds using B3LYP/6-31+G\*\*//MP2/6-311++G\*\* level of theory (Isodesmic)<sup>1</sup>

| Compounds                                                                           | $E_0$<br>[Hartree/Particle] | ZPE<br>[Hartree/Particle] | $H_T$<br>[Hartree/Particle] | $\Delta H_f^\circ(g)$<br>kJ/mol |
|-------------------------------------------------------------------------------------|-----------------------------|---------------------------|-----------------------------|---------------------------------|
| CH <sub>4</sub>                                                                     | -40.3796224                 | 0.044793                  | 0.003812                    | -74.60 <sup>a</sup>             |
| CH <sub>3</sub> ONO <sub>2</sub>                                                    | -319.509055                 | 0.054251                  | 0.005933                    | -137.28                         |
| CH <sub>3</sub> N <sub>3</sub>                                                      | -203.607680                 | 0.050250                  | 0.00543                     | 296.54                          |
|    | -231.5842377                | 0.100451                  | 0.005346                    | 82.90 <sup>b</sup>              |
|    | -371.870596                 | 0.076242                  | 0.008229                    | 301.80 <sup>b</sup>             |
|    | -371.8748474                | 0.077582                  | 0.007588                    | 280.72 <sup>b</sup>             |
|   | -371.3480753                | 0.065401                  | 0.006759                    | 108.09 <sup>b</sup>             |
|  | -363.0455559                | 0.140777                  | 0.009666                    | -41.26 <sup>b</sup>             |

[a] Data are from Ref. [ D. R. Lide ed., CRC Handbook of Chemistry and Physics, 88<sup>th</sup> Edition (Internet Version **2008**), CRC Press/Taylor and Francis, Boca Raton, FL.] <sup>b</sup>Obtained at G2 level. <sup>c</sup>Calculated according to the isodesmic equations as shown in Figure 1.

The gas phase enthalpies of formation  $\Delta H_f^\circ(g)$  were predicted using isodesmic equations as shown in Figure 1. Subsequently, their solid phase enthalpy of formation  $\Delta H_f^\circ(s)$  were calculated by using equations 6-7.<sup>2-4</sup>

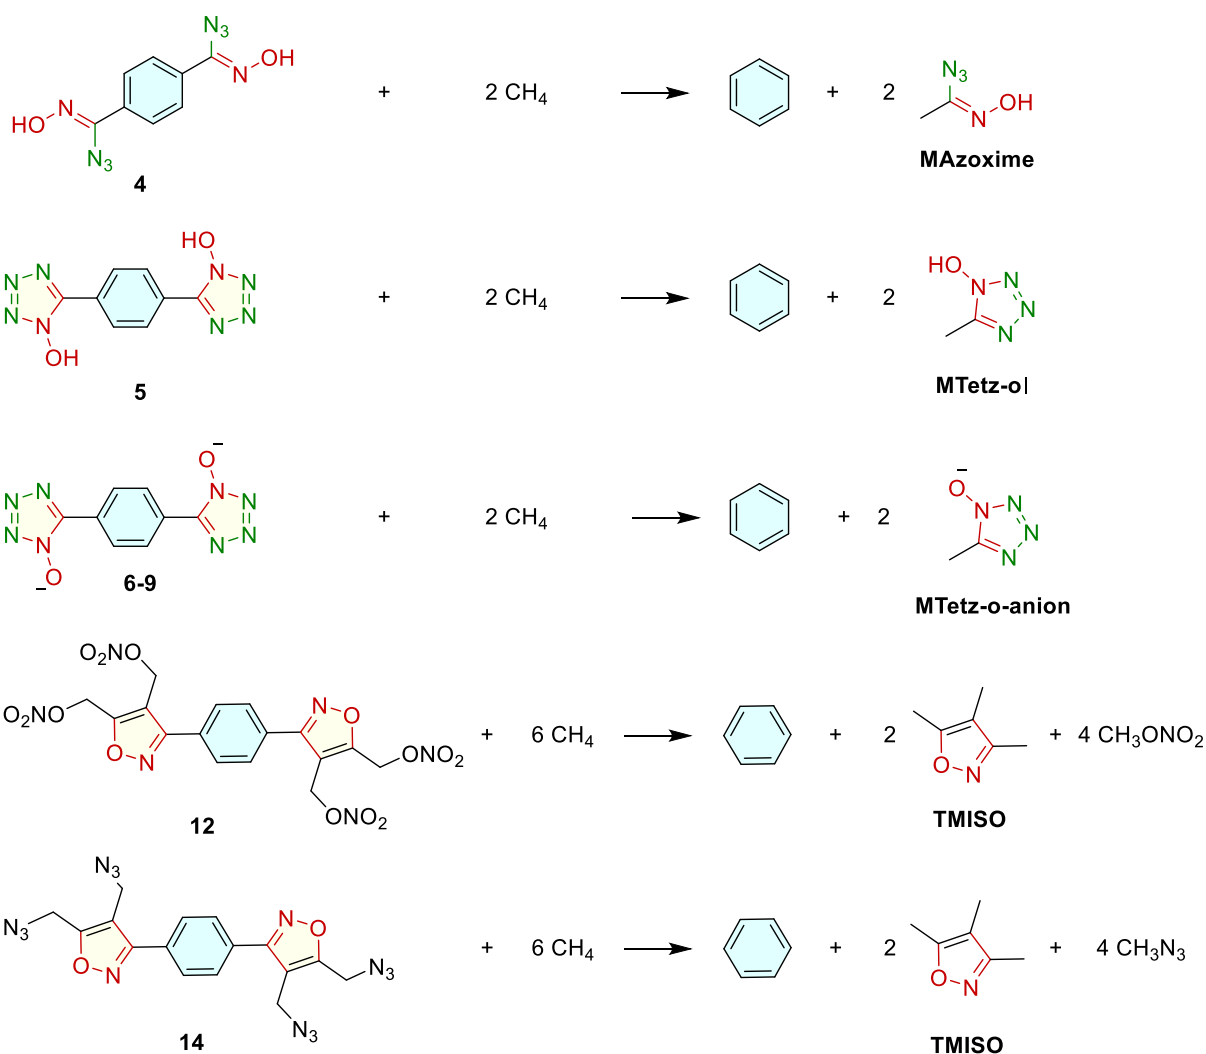

**Figure 1:** Isodesmic reactions for the title compounds **4**, **5**, **6-9**, **12**, and **14**.

$$\Delta H_f^\circ(\text{g})_{\text{Compound 4}} = \Delta H_f^\circ(\text{g})_{\text{Benzene}} + 2\Delta H_f^\circ(\text{g})_{\text{MAzoxime}} - 2\Delta H_f^\circ(\text{g})_{\text{Methane}} \quad (1)$$

$$\Delta H_f^\circ(\text{g})_{\text{Compound 5}} = \Delta H_f^\circ(\text{g})_{\text{Benzene}} + 2\Delta H_f^\circ(\text{g})_{\text{MTetz-ol}} - 2\Delta H_f^\circ(\text{g})_{\text{Methane}} \quad (2)$$

$$\Delta H_f^\circ(\text{g})_{\text{Compound 6-9}} = \Delta H_f^\circ(\text{g})_{\text{Benzene}} + 2\Delta H_f^\circ(\text{g})_{\text{MTetz-o-anion}} - 2\Delta H_f^\circ(\text{g})_{\text{Methane}} \quad (3)$$

$$\Delta H_f^\circ(\text{g})_{\text{Compound 12}} = \Delta H_f^\circ(\text{g})_{\text{Benzene}} + 2\Delta H_f^\circ(\text{g})_{\text{TMISO}} + 4\Delta H_f^\circ(\text{g})_{\text{Methylazide}} - 6\Delta H_f^\circ(\text{g})_{\text{Methane}} \quad (4)$$

$$\Delta H_f^\circ(\text{g})_{\text{Compound 14}} = \Delta H_f^\circ(\text{g})_{\text{Benzene}} + 2\Delta H_f^\circ(\text{g})_{\text{TMISO}} + 4\Delta H_f^\circ(\text{g})_{\text{Methylnitrate}} - 6\Delta H_f^\circ(\text{g})_{\text{Methane}} \quad (5)$$

$$\Delta H_f^\circ(\text{s}) = \Delta H_f^\circ(\text{g}) - \Delta H_{\text{sub}} \quad (6)$$

Where  $\Delta H_f^\circ(\text{s})$  is the solid phase enthalpy of formation,  $\Delta H_f^\circ(\text{g})$  is the gas phase enthalpy of formation and  $\Delta H_{\text{sub}}$  is the enthalpy of sublimation.

The enthalpy of sublimation was calculated based on Trouton's rule according to equation 2.<sup>3</sup>

$$\Delta H_{\text{sub}} = T \times 188 / \text{Jmol}^{-1} \text{K}^{-1} \quad (7)$$

Where,  $T$ , represents either the melting point or the decomposition temperature when no melting occurs before decomposition.

For salts, the solid-state enthalpy of formation is obtained using a Born-Haber energy cycle.<sup>4</sup>

**Table S2.** The standard enthalpies of combustion  $\Delta H_{f(\text{combust})}$  for the title compounds were calculated by following equation

$$\Delta H_{f(\text{combust})} = \sum \Delta H_{f(\text{products})} - \sum \Delta H_{f(\text{reactants})} \quad (8)$$

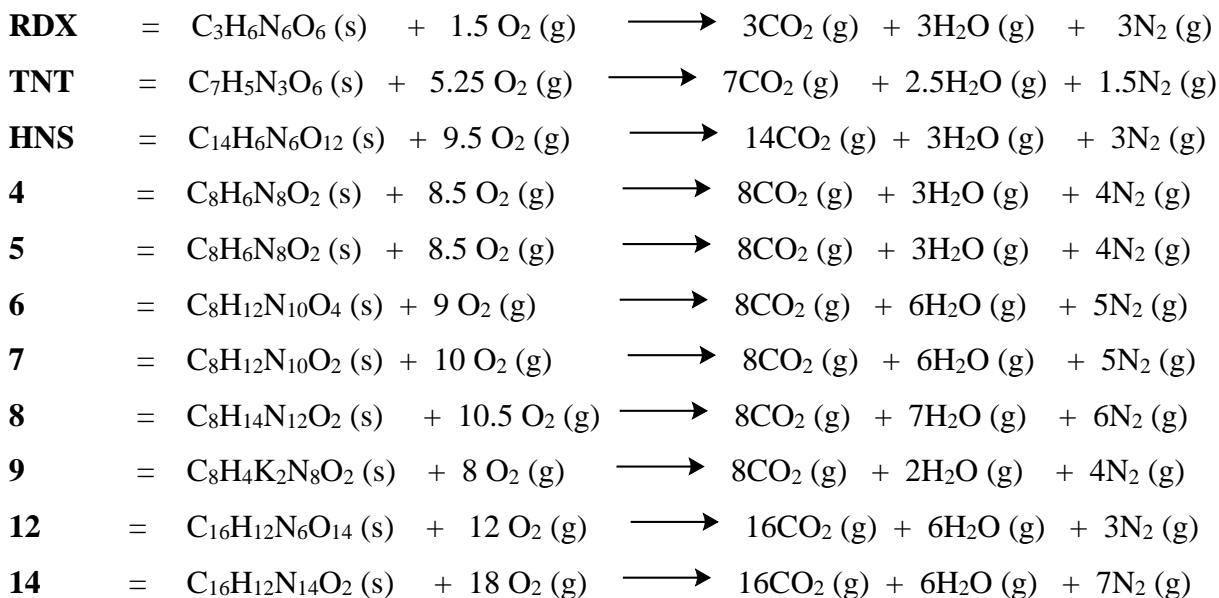

The standard enthalpy of formation for  $\text{CO}_2$  ( $\Delta H_{f(\text{CO}_2)} = -393.51 \text{ kJmol}^{-1}$ );  $\text{H}_2\text{O}$  ( $\Delta H_{f(\text{H}_2\text{O})} = -243.015 \text{ kJmol}^{-1}$ ).

**Table S3.** Computed electrostatic potential (ESP) of RDX and TNT

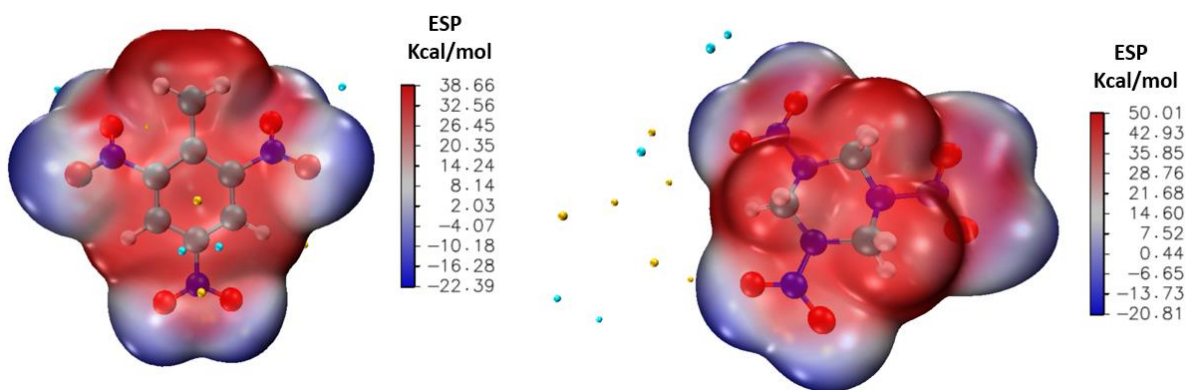

Computed electrostatic potential (ESP) maps of (a) TNT, (b) RDX. Color ranges in kcal/mol: Red, more positive; Blue, more negative and Greyer, in between positive and negative.

**Table S4:** Crystal data and structure refinement<sup>5-11</sup> for compound **12**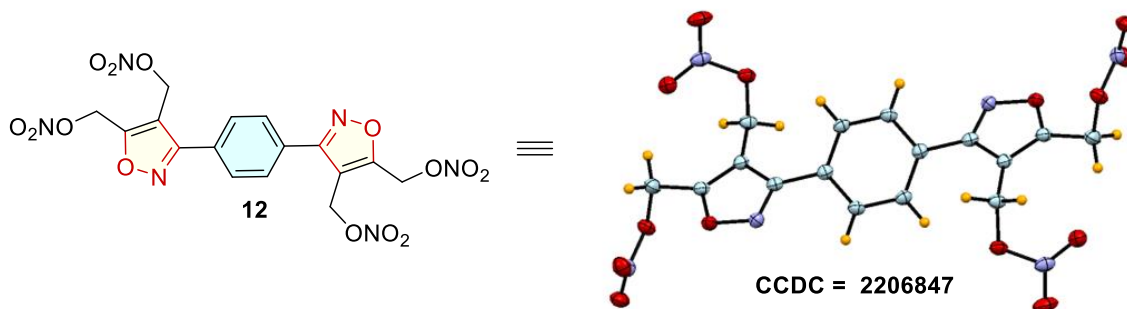

| Compound                                       | 12                                                             |
|------------------------------------------------|----------------------------------------------------------------|
| CCDC Number                                    | 2206847                                                        |
| Formula                                        | C <sub>16</sub> H <sub>12</sub> N <sub>6</sub> O <sub>14</sub> |
| <i>D</i> <sub>calc.</sub> / g cm <sup>-3</sup> | 1.697                                                          |
| <i>m</i> /mm <sup>-1</sup>                     | 1.345                                                          |
| Formula Weight                                 | 512.32                                                         |
| Color                                          | yellow                                                         |
| Shape                                          | plate-shaped                                                   |
| Size/mm <sup>3</sup>                           | 0.23×0.13×0.02                                                 |
| <i>T</i> /K                                    | 100.00(10)                                                     |
| Crystal System                                 | monoclinic                                                     |
| Space Group                                    | <i>P</i> 2 <sub>1</sub> / <i>c</i>                             |
| <i>a</i> /Å                                    | 7.58035(14)                                                    |
| <i>b</i> /Å                                    | 13.1249(3)                                                     |
| <i>c</i> /Å                                    | 10.13126(18)                                                   |
| <i>a</i> <sup>°</sup>                          | 90                                                             |
| <i>b</i> <sup>°</sup>                          | 95.9409(16)                                                    |
| <i>g</i> <sup>°</sup>                          | 90                                                             |
| <i>V</i> /Å <sup>3</sup>                       | 1002.56(3)                                                     |
| <i>Z</i>                                       | 2                                                              |
| <i>Z</i> '                                     | 0.5                                                            |
| Wavelength/Å                                   | 1.54184                                                        |
| Radiation type                                 | Cu K <sub>α</sub>                                              |
| <i>Q</i> <sub>min</sub> <sup>°</sup>           | 5.535                                                          |
| <i>Q</i> <sub>max</sub> <sup>°</sup>           | 76.070                                                         |
| Measured Refl's.                               | 11142                                                          |
| Indep't Refl's                                 | 2018                                                           |
| Refl's I ≥ 2 <i>s</i> (I)                      | 1831                                                           |
| <i>R</i> <sub>int</sub>                        | 0.0332                                                         |
| Parameters                                     | 194                                                            |
| Restraints                                     | 6                                                              |
| Largest Peak                                   | 0.333                                                          |
| Deepest Hole                                   | -0.231                                                         |
| GooF                                           | 1.064                                                          |
| <i>wR</i> <sub>2</sub> (all data)              | 0.0955                                                         |
| <i>wR</i> <sub>2</sub>                         | 0.0924                                                         |
| <i>R</i> <sub>1</sub> (all data)               | 0.0382                                                         |
| <i>R</i> <sub>1</sub>                          | 0.0347                                                         |

**Table S5:** Fractional Atomic Coordinates ( $\times 10^4$ ) and Equivalent Isotropic Displacement Parameters ( $\text{\AA}^2 \times 10^3$ ) for **12**.  $U_{eq}$  is defined as 1/3 of the trace of the orthogonalised  $U_{ij}$ .

| Atom | x           | y          | z          | $U_{eq}$ |
|------|-------------|------------|------------|----------|
| O1   | 6021.0(12)  | 5989.9(7)  | 1888.0(10) | 22.9(2)  |
| O2   | 4463.9(13)  | 2686.9(7)  | 1297.4(9)  | 24.0(2)  |
| O3   | 7398.2(14)  | 2808.1(8)  | 1853.2(10) | 30.1(3)  |
| O4   | 6302.2(17)  | 1703.8(8)  | 397.8(11)  | 38.0(3)  |
| O5   | 8004(3)     | 5287.2(19) | 4485(2)    | 24.7(6)  |
| O5B  | 8900(2)     | 5639.4(14) | 3696.8(19) | 25.7(6)  |
| O6   | 9180(3)     | 6595.9(17) | 3430(2)    | 31.3(6)  |
| O6B  | 6917(3)     | 5450.7(16) | 5165(2)    | 34.3(6)  |
| O7   | 8970(70)    | 6660(30)   | 5540(30)   | 33.6(5)  |
| O7B  | 8930(60)    | 6620(30)   | 5450(30)   | 33.6(5)  |
| N1   | 4327.1(15)  | 6097.4(9)  | 1196.0(11) | 21.9(3)  |
| N2   | 6212.2(17)  | 2384.0(9)  | 1185.4(11) | 26.0(3)  |
| N3   | 8786(4)     | 6268(2)    | 4462(3)    | 25.3(7)  |
| N3B  | 8172(4)     | 5923(2)    | 4869(3)    | 25.5(6)  |
| C1   | 3554.1(17)  | 5205.7(10) | 1271.6(12) | 19.5(3)  |
| C2   | 4697.2(17)  | 4487.7(10) | 2007.7(13) | 20.1(3)  |
| C3   | 6192.4(18)  | 5031.3(10) | 2364.1(13) | 21.4(3)  |
| C4   | 4296.5(18)  | 3415.2(10) | 2372.1(13) | 22.1(3)  |
| C5   | 7933(2)     | 4773.7(11) | 3116.1(15) | 28.2(3)  |
| C6   | 1724.6(17)  | 5086.4(10) | 636.6(12)  | 19.7(3)  |
| C7   | 603.2(18)   | 5936.9(10) | 508.8(13)  | 21.3(3)  |
| C8   | -1101.8(18) | 5850.7(10) | -122.0(13) | 20.9(3)  |

**Table S6:** Anisotropic Displacement Parameters ( $\times 10^4$ ) for **12**. The anisotropic displacement factor exponent takes the form:  $-2p^2[h^2a^{*2} \times U_{11} + \dots + 2hka^* \times b^* \times U_{12}]$

| Atom | $U_{11}$ | $U_{22}$ | $U_{33}$ | $U_{23}$ | $U_{13}$ | $U_{12}$ |
|------|----------|----------|----------|----------|----------|----------|
| O1   | 22.5(5)  | 16.9(5)  | 28.4(5)  | -1.5(4)  | -2.0(4)  | 0.0(3)   |
| O2   | 29.8(5)  | 17.1(5)  | 24.1(5)  | -0.5(4)  | -1.4(4)  | 1.5(4)   |
| O3   | 29.5(5)  | 26.4(5)  | 33.9(6)  | -3.5(4)  | 1.3(4)   | 2.1(4)   |
| O4   | 59.1(8)  | 24.6(6)  | 28.8(6)  | -7.7(4)  | -2.6(5)  | 14.7(5)  |
| O5   | 29.1(12) | 19.6(13) | 24.8(11) | -0.5(9)  | -0.9(9)  | -4.6(9)  |
| O5B  | 23.2(10) | 26.2(11) | 27.4(10) | -6.6(8)  | 2.0(7)   | -4.2(7)  |
| O6   | 30.5(12) | 30.2(13) | 33.2(12) | 4.8(9)   | 2.7(9)   | -6.6(9)  |
| O6B  | 44.5(13) | 28.6(11) | 31.4(11) | -3.4(8)  | 12.1(9)  | -6.5(9)  |
| O7   | 36.6(19) | 25(2)    | 36(2)    | -9.4(12) | -9(2)    | 0.4(12)  |
| O7B  | 36.6(19) | 25(2)    | 36(2)    | -9.4(12) | -9(2)    | 0.4(12)  |
| N1   | 20.7(6)  | 19.2(6)  | 25.2(6)  | -0.3(4)  | -0.9(4)  | 2.0(4)   |
| N2   | 36.1(7)  | 18.8(6)  | 23.0(6)  | 1.9(4)   | 2.0(5)   | 5.9(5)   |
| N3   | 20.6(14) | 24.8(16) | 29.5(16) | -0.9(13) | -2.3(11) | 0.0(11)  |
| N3B  | 28.0(14) | 21.4(16) | 25.7(14) | -2.1(12) | -4.0(11) | 4.4(11)  |
| C1   | 23.1(7)  | 16.8(6)  | 19.0(6)  | -1.3(5)  | 3.4(5)   | 2.0(5)   |
| C2   | 22.4(6)  | 18.3(7)  | 19.4(6)  | -1.7(5)  | 1.2(5)   | 2.5(5)   |
| C3   | 26.0(7)  | 16.3(6)  | 21.2(6)  | -2.0(5)  | -0.1(5)  | 2.4(5)   |
| C4   | 27.2(7)  | 18.4(7)  | 20.3(6)  | 0.5(5)   | 1.3(5)   | 1.1(5)   |
| C5   | 28.3(7)  | 21.1(7)  | 32.9(8)  | -4.7(6)  | -8.5(6)  | 2.2(5)   |
| C6   | 22.0(6)  | 18.8(6)  | 18.1(6)  | 1.8(5)   | 2.3(5)   | 1.0(5)   |
| C7   | 25.4(7)  | 15.6(6)  | 22.8(6)  | -0.1(5)  | 2.1(5)   | 0.4(5)   |
| C8   | 23.5(6)  | 17.1(6)  | 21.9(6)  | 1.7(5)   | 1.8(5)   | 3.5(5)   |



**Table S7:** Bond Angles in for compound 12.

| Atom | Atom | Atom | Angle/°    |
|------|------|------|------------|
| C3   | O1   | N1   | 108.74(10) |
| N2   | O2   | C4   | 113.67(10) |
| N3   | O5   | C5   | 111.01(19) |
| N3B  | O5B  | C5   | 108.9(2)   |
| C1   | N1   | O1   | 105.75(10) |
| O3   | N2   | O2   | 118.77(11) |
| O4   | N2   | O2   | 112.55(12) |
| O4   | N2   | O3   | 128.68(13) |
| O6   | N3   | O5   | 118.9(2)   |
| O6   | N3   | O7   | 128.3(18)  |
| O7   | N3   | O5   | 112.8(18)  |
| O6B  | N3B  | O5B  | 117.6(3)   |
| O7B  | N3B  | O5B  | 114.0(17)  |
| O7B  | N3B  | O6B  | 128.4(17)  |
| N1   | C1   | C2   | 111.46(12) |
| N1   | C1   | C6   | 118.27(11) |
| C2   | C1   | C6   | 130.26(12) |
| C1   | C2   | C4   | 128.27(12) |
| C3   | C2   | C1   | 103.64(12) |
| C3   | C2   | C4   | 127.98(12) |
| O1   | C3   | C2   | 110.40(12) |
| O1   | C3   | C5   | 116.18(12) |
| C2   | C3   | C5   | 133.39(13) |
| O2   | C4   | C2   | 113.32(10) |
| O5B  | C5   | C3   | 114.49(13) |
| C3   | C5   | O5   | 107.92(13) |
| C7   | C6   | C1   | 119.32(12) |
| C81  | C6   | C1   | 121.44(12) |
| C81  | C6   | C7   | 119.21(12) |
| C8   | C7   | C6   | 120.36(13) |
| C7   | C8   | C61  | 120.42(12) |

**Table S8:** Bond Lengths in Å for compound 12.

| Atom | Atom | Length/Å   |
|------|------|------------|
| O1   | N1   | 1.4050(14) |
| O1   | C3   | 1.3488(16) |
| O2   | N2   | 1.3994(16) |
| O2   | C4   | 1.4642(16) |
| O3   | N2   | 1.2042(16) |
| O4   | N2   | 1.2039(16) |
| O5   | N3   | 1.419(4)   |
| O5   | C5   | 1.538(3)   |
| O5B  | N3B  | 1.410(3)   |
| O5B  | C5   | 1.444(2)   |

| Atom | Atom            | Length/Å   |
|------|-----------------|------------|
| O6   | N3              | 1.197(4)   |
| O6B  | N3B             | 1.200(4)   |
| O7   | N3              | 1.199(16)  |
| O7B  | N3B             | 1.199(15)  |
| N1   | C1              | 1.3146(18) |
| C1   | C2              | 1.4357(18) |
| C1   | C6              | 1.4755(18) |
| C2   | C3              | 1.3562(19) |
| C2   | C4              | 1.4945(18) |
| C3   | C5              | 1.4923(19) |
| C6   | C7              | 1.4010(19) |
| C6   | C8 <sup>1</sup> | 1.3987(19) |
| C7   | C8              | 1.3860(19) |

**Table S9:** Torsion Angles in ° for **compound 12**.

| Atom | Atom | Atom | Atom            | Angle/°     |
|------|------|------|-----------------|-------------|
| O1   | N1   | C1   | C2              | 0.03(14)    |
| O1   | N1   | C1   | C6              | 179.43(10)  |
| O1   | C3   | C5   | O5              | 74.45(17)   |
| O1   | C3   | C5   | O5B             | 24.18(19)   |
| N1   | O1   | C3   | C2              | 0.78(14)    |
| N1   | O1   | C3   | C5              | 179.16(11)  |
| N1   | C1   | C2   | C3              | 0.42(15)    |
| N1   | C1   | C2   | C4              | 176.88(12)  |
| N1   | C1   | C6   | C7              | -28.19(18)  |
| N1   | C1   | C6   | C8 <sup>1</sup> | 149.78(12)  |
| N2   | O2   | C4   | C2              | 81.13(13)   |
| N3   | O5   | C5   | C3              | -91.6(2)    |
| N3B  | O5B  | C5   | C3              | 78.8(2)     |
| C1   | C2   | C3   | O1              | -0.72(14)   |
| C1   | C2   | C3   | C5              | -178.72(15) |
| C1   | C2   | C4   | O2              | 81.32(16)   |
| C1   | C6   | C7   | C8              | 177.92(11)  |
| C2   | C1   | C6   | C7              | 151.07(13)  |
| C2   | C1   | C6   | C8 <sup>1</sup> | -30.9(2)    |
| C2   | C3   | C5   | O5              | -107.64(18) |
| C2   | C3   | C5   | O5B             | -157.91(16) |
| C3   | O1   | N1   | C1              | -0.48(13)   |
| C3   | C2   | C4   | O2              | -103.05(15) |
| C4   | O2   | N2   | O3              | -7.62(16)   |
| C4   | O2   | N2   | O4              | 172.26(11)  |
| C4   | C2   | C3   | O1              | -177.19(12) |
| C4   | C2   | C3   | C5              | 4.8(2)      |
| C5   | O5   | N3   | O6              | 4.3(3)      |
| C5   | O5   | N3   | O7              | -175(3)     |
| C5   | O5B  | N3B  | O6B             | -1.8(3)     |
| C5   | O5B  | N3B  | O7B             | 178(3)      |
| C6   | C1   | C2   | C3              | -178.88(13) |

| Atom            | Atom | Atom | Atom            | Angle/° |
|-----------------|------|------|-----------------|---------|
| C6              | C1   | C2   | C4              | -2.4(2) |
| C6              | C7   | C8   | C6 <sup>1</sup> | 0.1(2)  |
| C8 <sup>1</sup> | C6   | C7   | C8              | -0.1(2) |

**Table S10:** Hydrogen Fractional Atomic Coordinates ( $\times 10^4$ ) and Equivalent Isotropic Displacement Parameters ( $\text{\AA}^2 \times 10^3$ ) for **compound 12**.  $U_{eq}$  is defined as 1/3 of the trace of the orthogonalised  $U_{ij}$ .

| Atom | x        | y       | Z       | $U_{eq}$ |
|------|----------|---------|---------|----------|
| H4A  | 5114.13  | 3212.6  | 3153.54 | 26       |
| H4B  | 3072.68  | 3383.79 | 2629.07 | 26       |
| H5AA | 8917.03  | 5023.07 | 2632.16 | 34       |
| H5AB | 8050.15  | 4026    | 3220.12 | 34       |
| H5BC | 7723.38  | 4289.38 | 3832.7  | 34       |
| H5BD | 8678.22  | 4423.49 | 2509.64 | 34       |
| H7   | 1013.81  | 6576.32 | 856.54  | 26       |
| H8   | -1852.36 | 6431.75 | -205.52 | 25       |

**Table S11:** Atomic Occupancies for all atoms that are not fully occupied in **compound 12**.

| Atom | Occupancy |
|------|-----------|
| O5   | 0.475(3)  |
| O5B  | 0.525(3)  |
| O6   | 0.475(3)  |
| O6B  | 0.525(3)  |
| O7   | 0.475(3)  |
| O7B  | 0.525(3)  |
| N3   | 0.475(3)  |
| N3B  | 0.525(3)  |
| H5AA | 0.475(3)  |
| H5AB | 0.475(3)  |
| H5BC | 0.525(3)  |
| H5BD | 0.525(3)  |

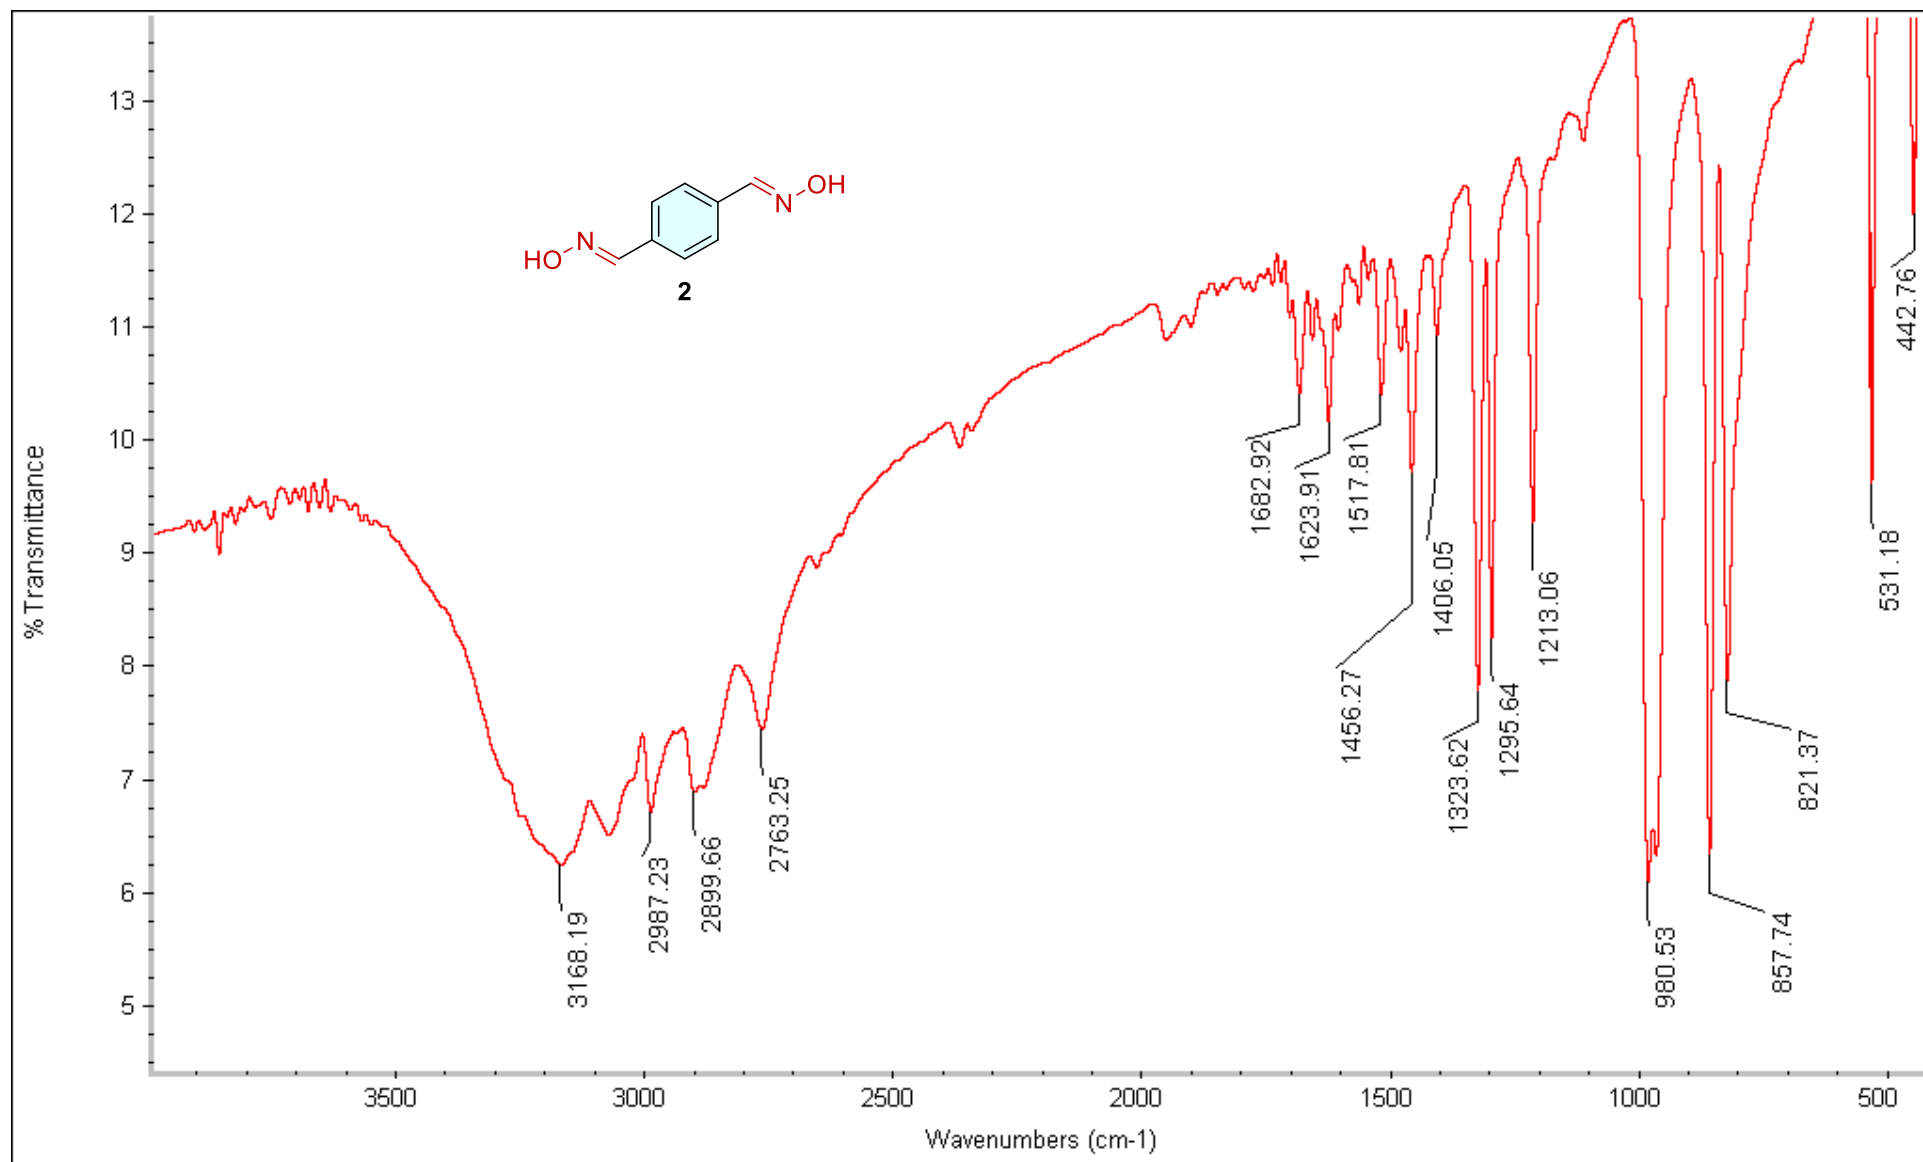

**Figure S2.** FTIR-Spectrum of Compound 2

Current Data Parameters  
NAME 1H  
EXPNO 333  
PROCNO 1

F2 - Acquisition Parameters  
Date\_ 20220727  
Time\_ 16.40  
INSTRUM spect  
PROBHD 5 mm QNP 1H/13  
PULPROG zg  
TD 32768  
SOLVENT DMSO  
NS 5  
DS 0  
SWH 7485.030 Hz  
FIDRES 0.228425 Hz  
AQ 2.1889024 sec  
RG 57  
DW 66.800 usec  
DE 6.00 usec  
TE 300.0 K  
D1 1.00000000 sec

==== CHANNEL f1 =====  
NUC1 1H  
P1 3.00 usec  
PL1 -4.00 dB  
SFO1 300.1330013 MHz

F2 - Processing parameters  
SI 32768  
SF 300.1300041 MHz  
WDW EM  
SSB 0  
LB 0.10 Hz  
GB 0  
PC 1.00

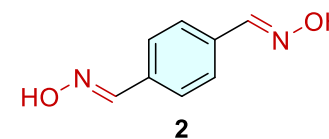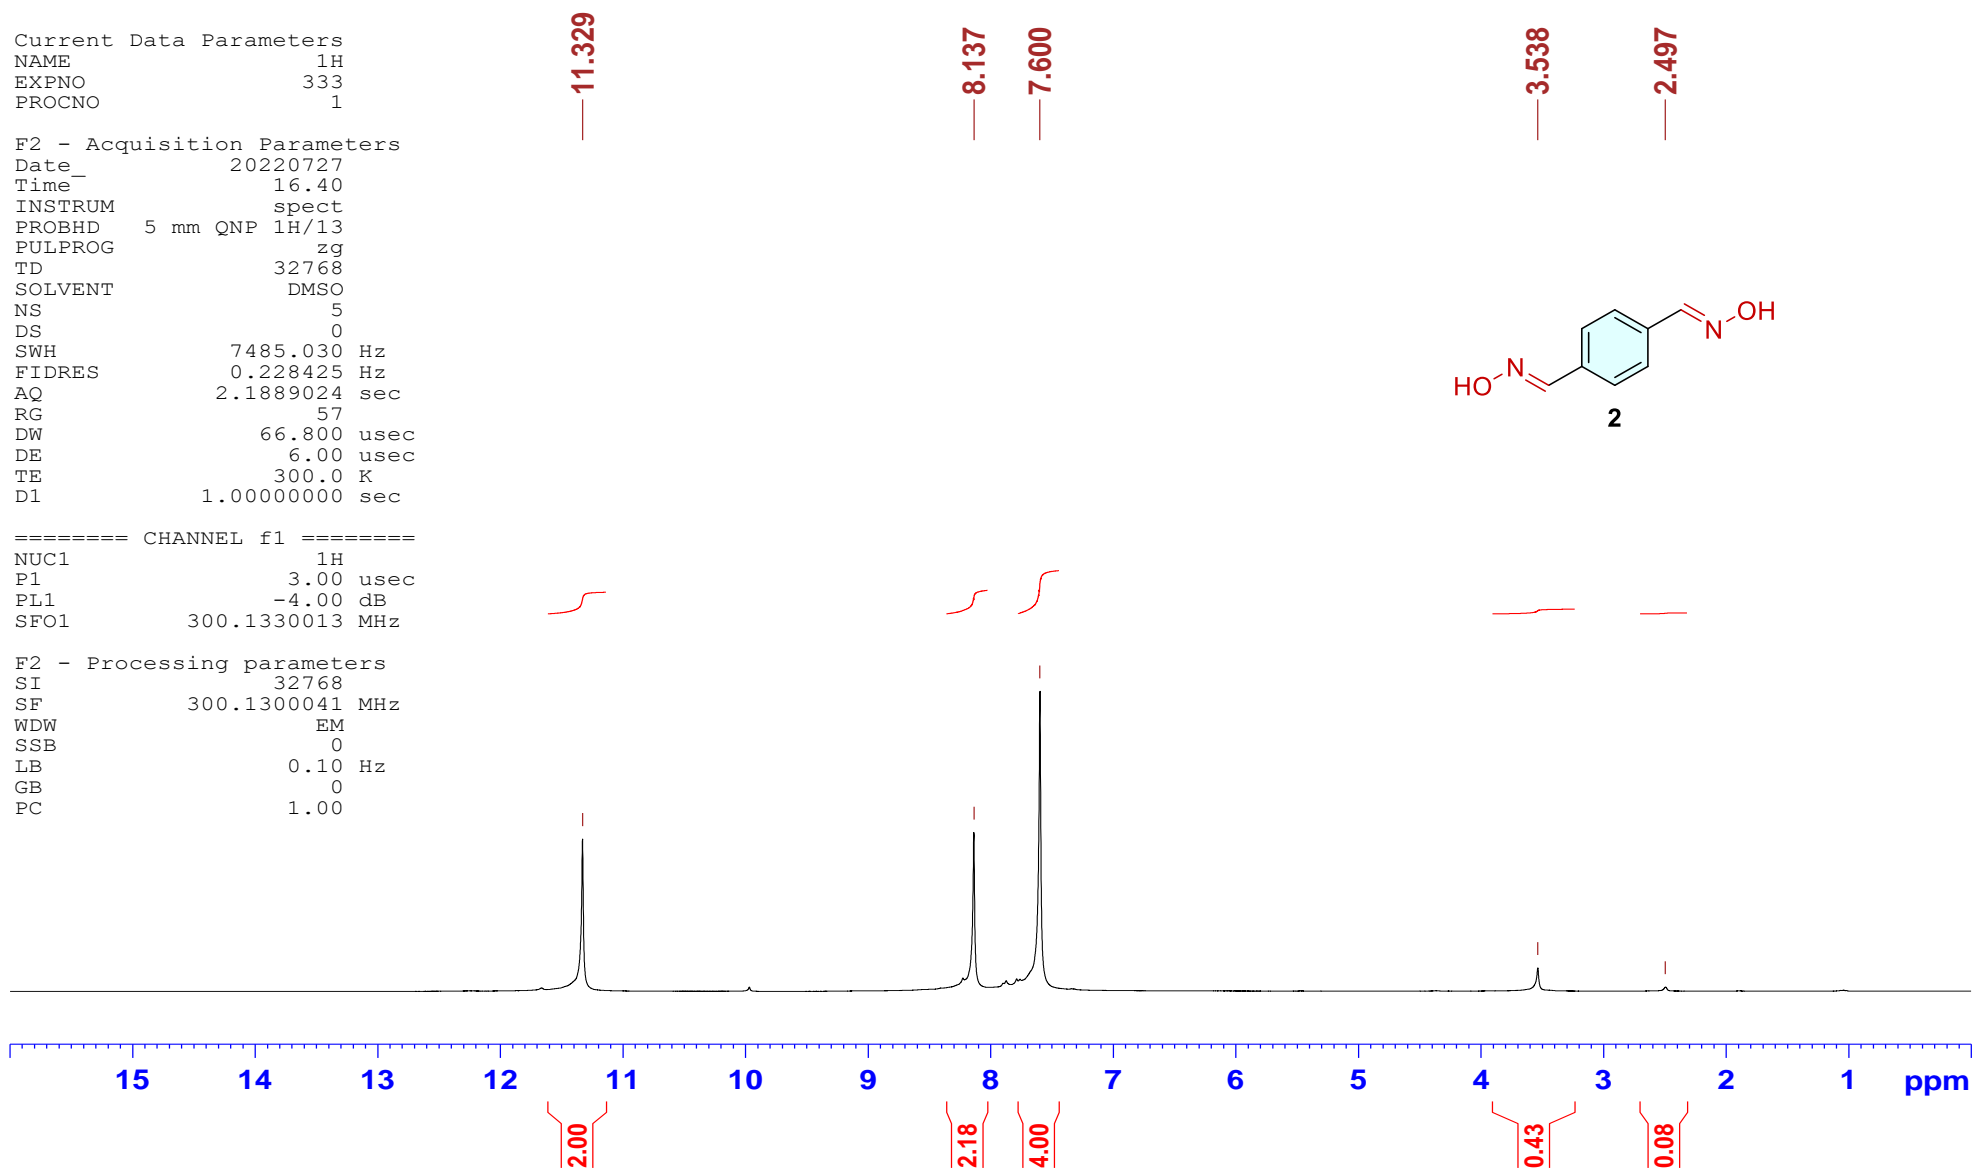

Figure S3. <sup>1</sup>H NMR Spectrum of Compound 2

Current Data Parameters  
NAME 13C  
EXPNO 333  
PROCNO 1

F2 - Acquisition Parameters  
Date\_ 20220727  
Time\_ 16.43  
INSTRUM spect  
PROBHD 5 mm QNP 1H/13  
PULPROG zgpg  
TD 32768  
SOLVENT DMSO  
NS 6  
DS 0  
SWH 19960.080 Hz  
FIDRES 0.609133 Hz  
AQ 0.8208384 sec  
RG 20642.5  
DW 25.050 usec  
DE 6.00 usec  
TE 300.0 K  
D1 1.00000000 sec  
d11 0.03000000 sec  
d12 0.00002000 sec

==== CHANNEL f1 =====  
NUC1 13C  
P1 4.00 usec  
PL1 -5.00 dB  
SFO1 75.4760505 MHz

==== CHANNEL f2 =====  
CPDPRG[2] waltz16  
NUC2 1H  
PCPD2 100.00 usec  
PL2 120.00 dB  
PL12 17.00 dB  
PL13 17.00 dB  
SFO2 300.1312005 MHz

F2 - Processing parameters  
SI 32768  
SF 75.4677765 MHz  
WDW EM  
SSB 0  
LB 1.00 Hz  
GB 0  
PC 1.40

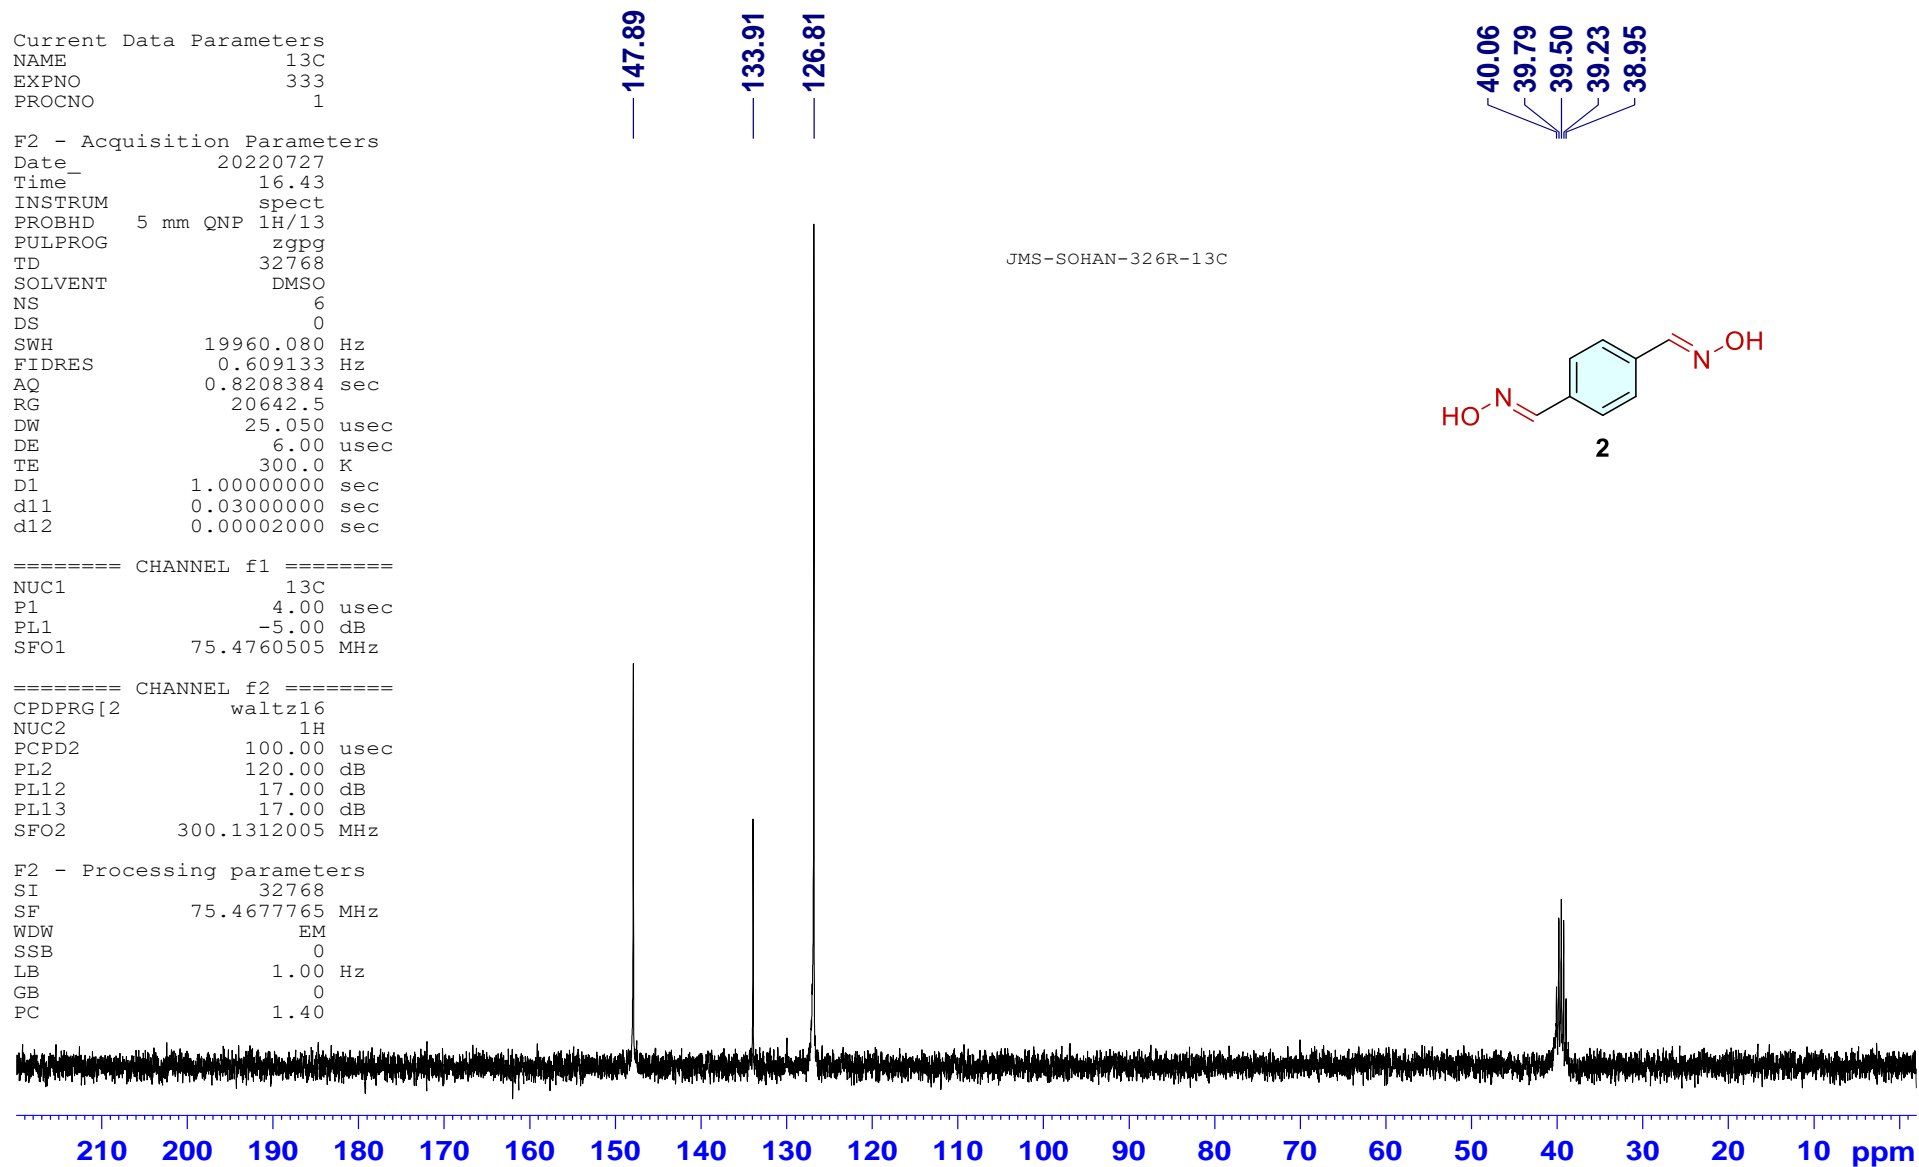

Figure S4. <sup>13</sup>C NMR Spectrum of Compound 2

Current Data Parameters  
NAME DEPT135  
EXPNO 94  
PROCNO 1

F2 - Acquisition Parameters

Date\_ 20220727  
Time\_ 16.45  
INSTRUM spect  
PROBHD 5 mm QNP 1H/13  
PULPROG dept135  
TD 32768  
SOLVENT DMSO  
NS 8  
DS 16  
SWH 19960.080 Hz  
FIDRES 0.609133 Hz  
AQ 0.8208384 sec  
RG 18390.4  
DW 25.050 usec  
DE 6.00 usec  
TE 300.0 K  
CNST2 140.0000000  
D1 2.00000000 sec  
d2 0.00357143 sec  
d12 0.00002000 sec  
DELTA 0.00000891 sec

==== CHANNEL f1 =====

NUC1 13C  
P1 7.00 usec  
p2 14.00 usec  
PL1 -5.00 dB  
SFO1 75.4760505 MHz

==== CHANNEL f2 =====

CPDPRG[2] waltz16  
NUC2 1H  
p3 6.10 usec  
p4 12.20 usec  
PCPD2 100.00 usec  
PL2 -6.00 dB  
PL12 18.54 dB  
SFO2 300.1312005 MHz

F2 - Processing parameters

SI 32768  
SF 75.4677765 MHz  
WDW EM  
SSB 0  
LB 1.00 Hz  
GB 0  
PC 1.40

147.90

126.80

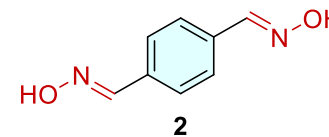

JMS-SOHN-326R-DEPT135

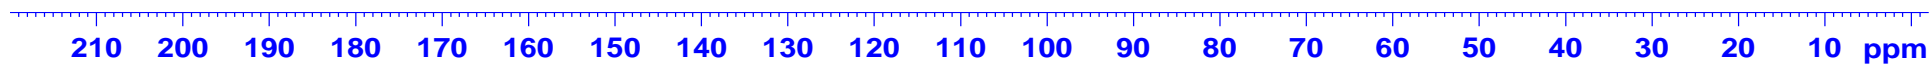

Figure S5. <sup>13</sup>C-DEPT135 NMR Spectrum of Compound 2

Sample: SOHAN-326 at 5°C  
Size: 0.1000 mg  
Method: Ramp  
Comment: Cell constant calibration

DSC

File: C:\...\DSC\SOHAN\SOHAN-326 at 5°C.001  
Operator: SOHAN  
Run Date: 22-Aug-2022 14:39  
Instrument: DSC Q2000 V24.11 Build 124

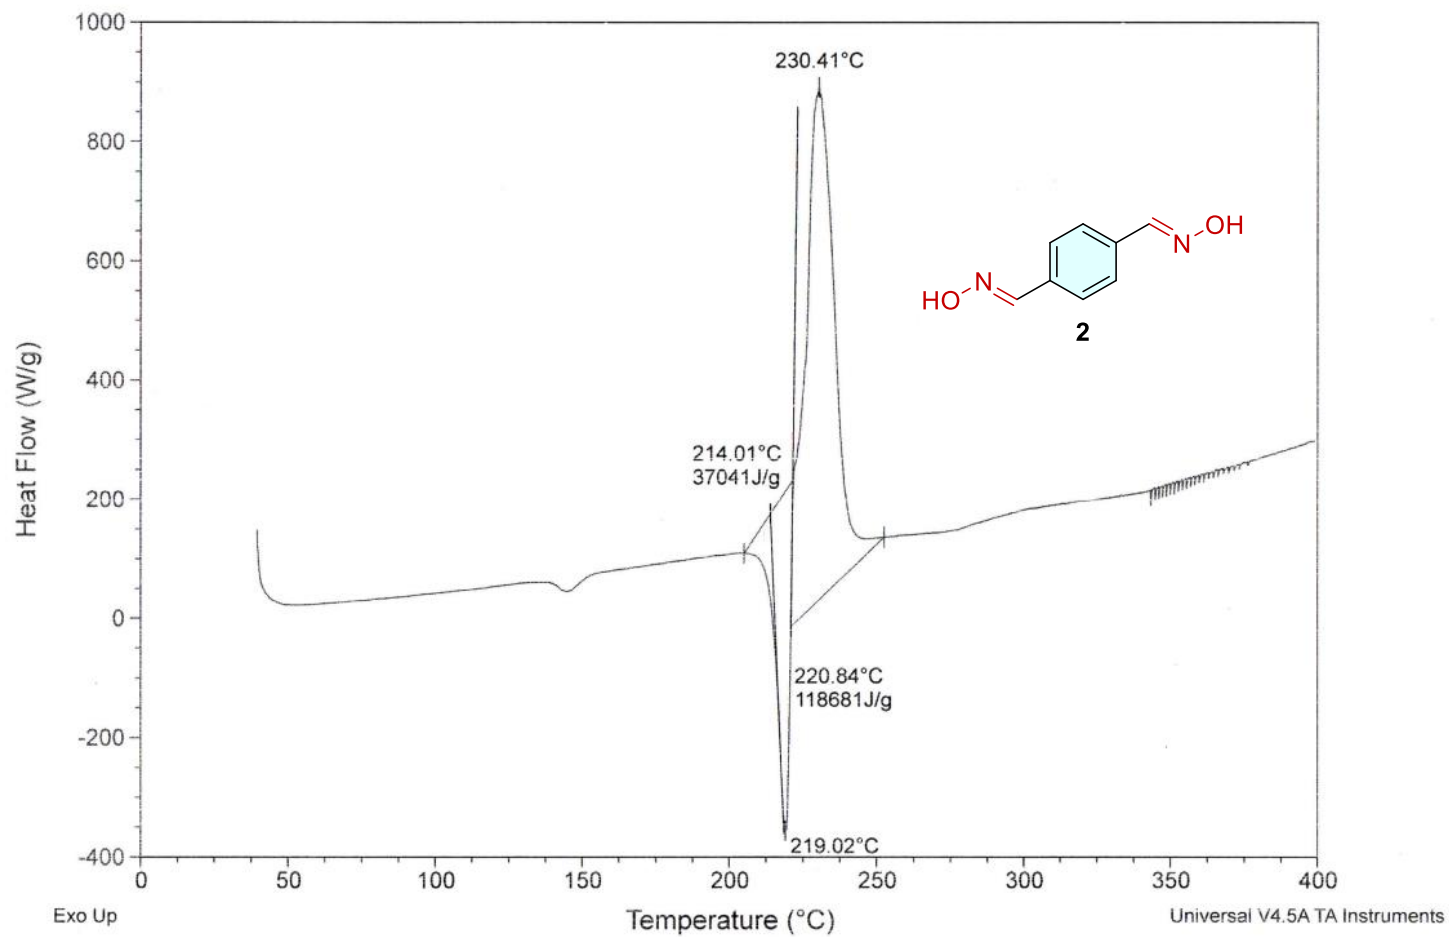

Figure S6. DSC of compound 2 at 5 °C min<sup>-1</sup>



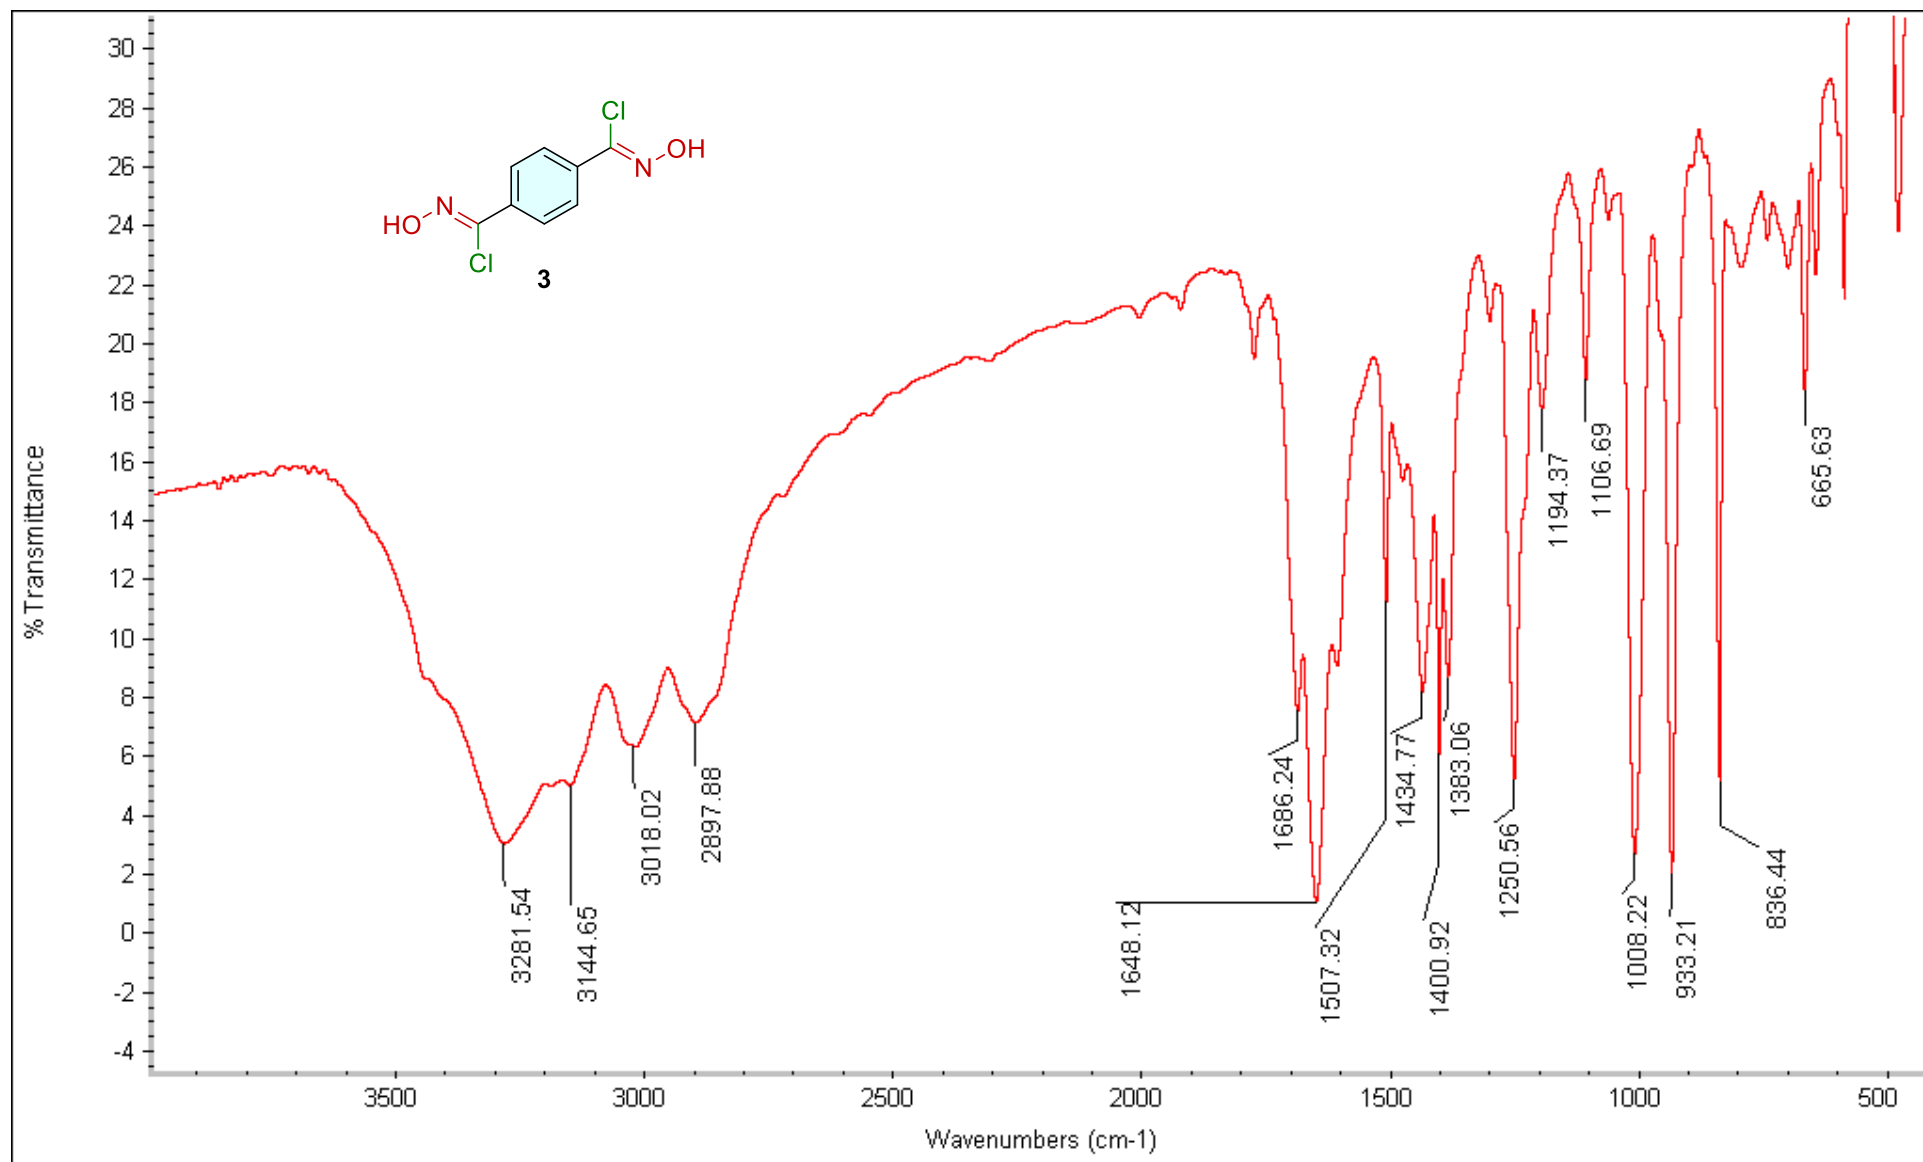

**Figure S7.** FTIR-Spectrum of Compound 3

Current Data Parameters  
NAME NMR data 11-09-2022  
EXPNO 338  
PROCNO 1

F2 - Acquisition Parameters  
Date\_ 20220729  
Time\_ 22.08  
INSTRUM spect  
PROBHD 5 mm QNP 1H/13  
PULPROG zg  
TD 32768  
SOLVENT DMSO  
NS 4  
DS 0  
SWH 7485.030 Hz  
FIDRES 0.228425 Hz  
AQ 2.1889024 sec  
RG 114  
DW 66.800 usec  
DE 6.00 usec  
TE 300.0 K  
D1 1.00000000 sec

JMS-SOHAN-331-1H

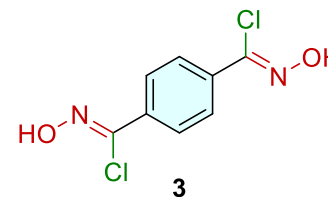

==== CHANNEL f1 =====  
NUC1 1H  
P1 3.00 usec  
PL1 -4.00 dB  
SFO1 300.1330013 MHz  
  
F2 - Processing parameters  
SI 32768  
SF 300.1301181 MHz  
WDW EM  
SSB 0  
LB 0.10 Hz  
GB 0  
PC 1.00

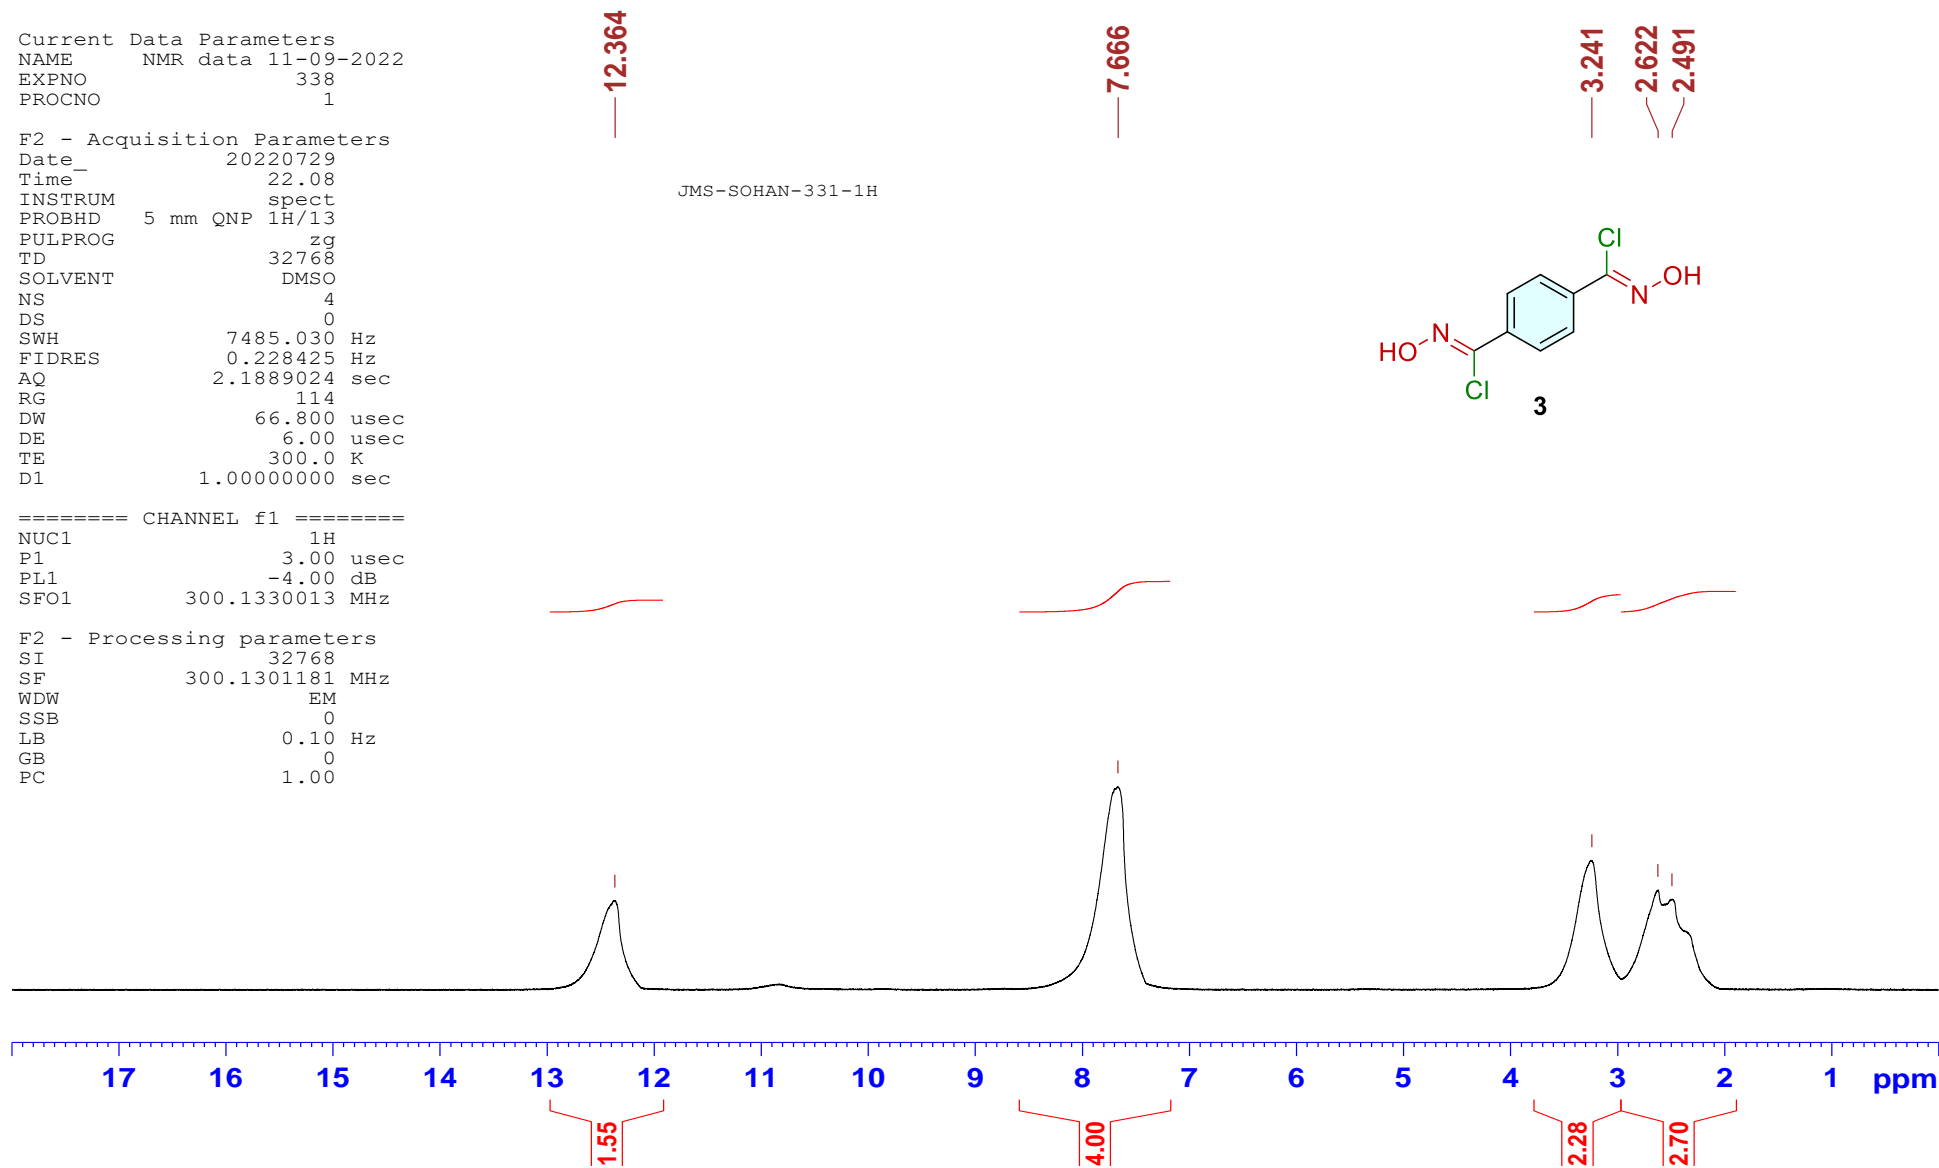

Figure S8. <sup>1</sup>H NMR Spectrum of Compound 3

Current Data Parameters  
NAME New Folder  
EXPNO 338  
PROCNO 1

F2 - Acquisition Parameters  
Date\_ 20220729  
Time\_ 22.10  
INSTRUM spect  
PROBHD 5 mm QNP 1H/13  
PULPROG zgpg  
TD 32768  
SOLVENT DMSO  
NS 50  
DS 0  
SWH 19960.080 Hz  
FIDRES 0.609133 Hz  
AQ 0.8208384 sec  
RG 20642.5  
DW 25.050 usec  
DE 6.00 usec  
TE 300.0 K  
D1 1.00000000 sec  
d11 0.03000000 sec  
d12 0.00002000 sec

JMS-SOHAN-331-13C

==== CHANNEL f1 =====  
NUC1 13C  
P1 4.00 usec  
PL1 -5.00 dB  
SFO1 75.4760505 MHz

==== CHANNEL f2 =====  
CPDPRG[2] waltz16  
NUC2 1H  
PCPD2 100.00 usec  
PL2 120.00 dB  
PL12 17.00 dB  
PL13 17.00 dB  
SFO2 300.1312005 MHz

F2 - Processing parameters  
SI 32768  
SF 75.4677959 MHz  
WDW EM  
SSB 0  
LB 5.00 Hz  
GB 0  
PC 1.40

134.85  
134.13  
126.87

134.850  
134.134

39.50

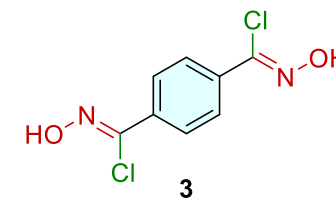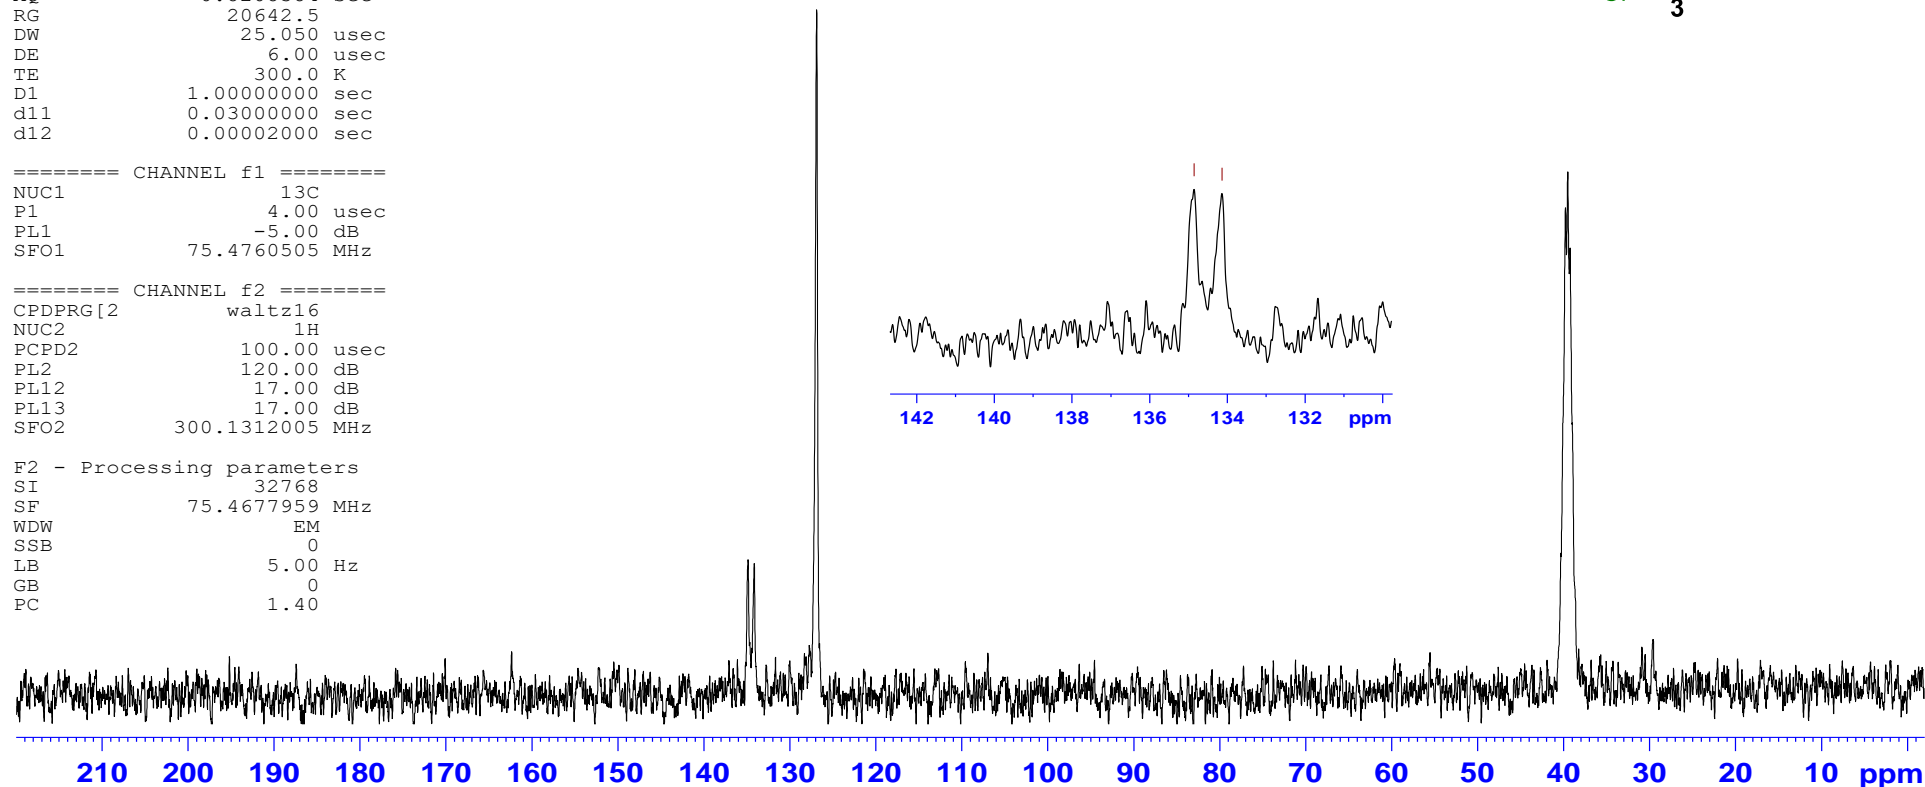

Figure S9. <sup>13</sup>C NMR Spectrum of Compound 3

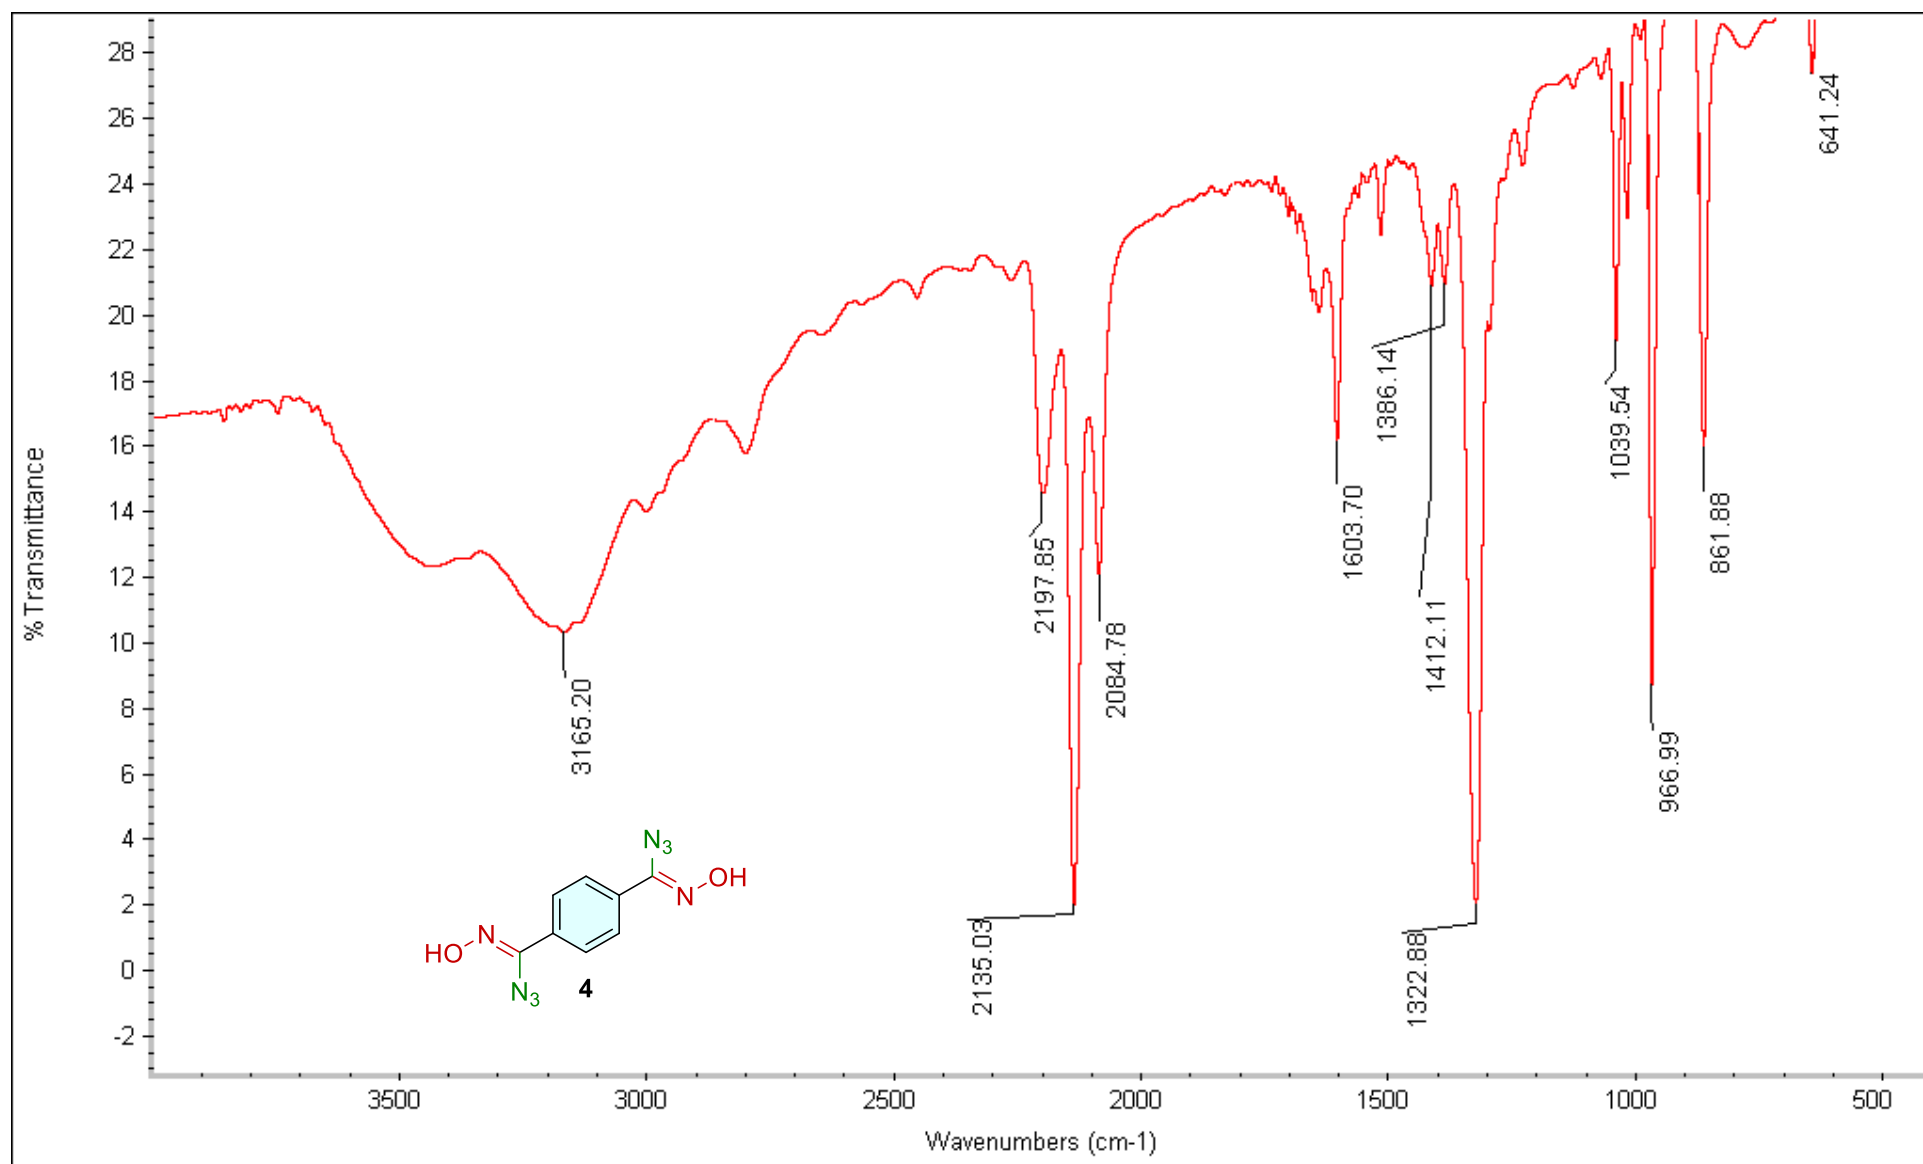

**Figure S10.** FTIR-Spectrum of Compound 4

Current Data Parameters  
NAME 1H  
EXPNO 341  
PROCNO 1

F2 - Acquisition Parameters  
Date\_ 20220805  
Time\_ 21.45  
INSTRUM spect  
PROBHD 5 mm QNP 1H/13  
PULPROG zg  
TD 32768  
SOLVENT DMSO  
NS 16  
DS 0  
SWH 7485.030 Hz  
FIDRES 0.228425 Hz  
AQ 2.1889024 sec  
RG 181  
DW 66.800 usec  
DE 6.00 usec  
TE 300.0 K  
D1 1.00000000 sec

==== CHANNEL f1 =====  
NUC1 1H  
P1 3.00 usec  
PL1 -4.00 dB  
SFO1 300.1330013 MHz

F2 - Processing parameters  
SI 32768  
SF 300.1300020 MHz  
WDW EM  
SSB 0  
LB 0.10 Hz  
GB 0  
PC 1.00

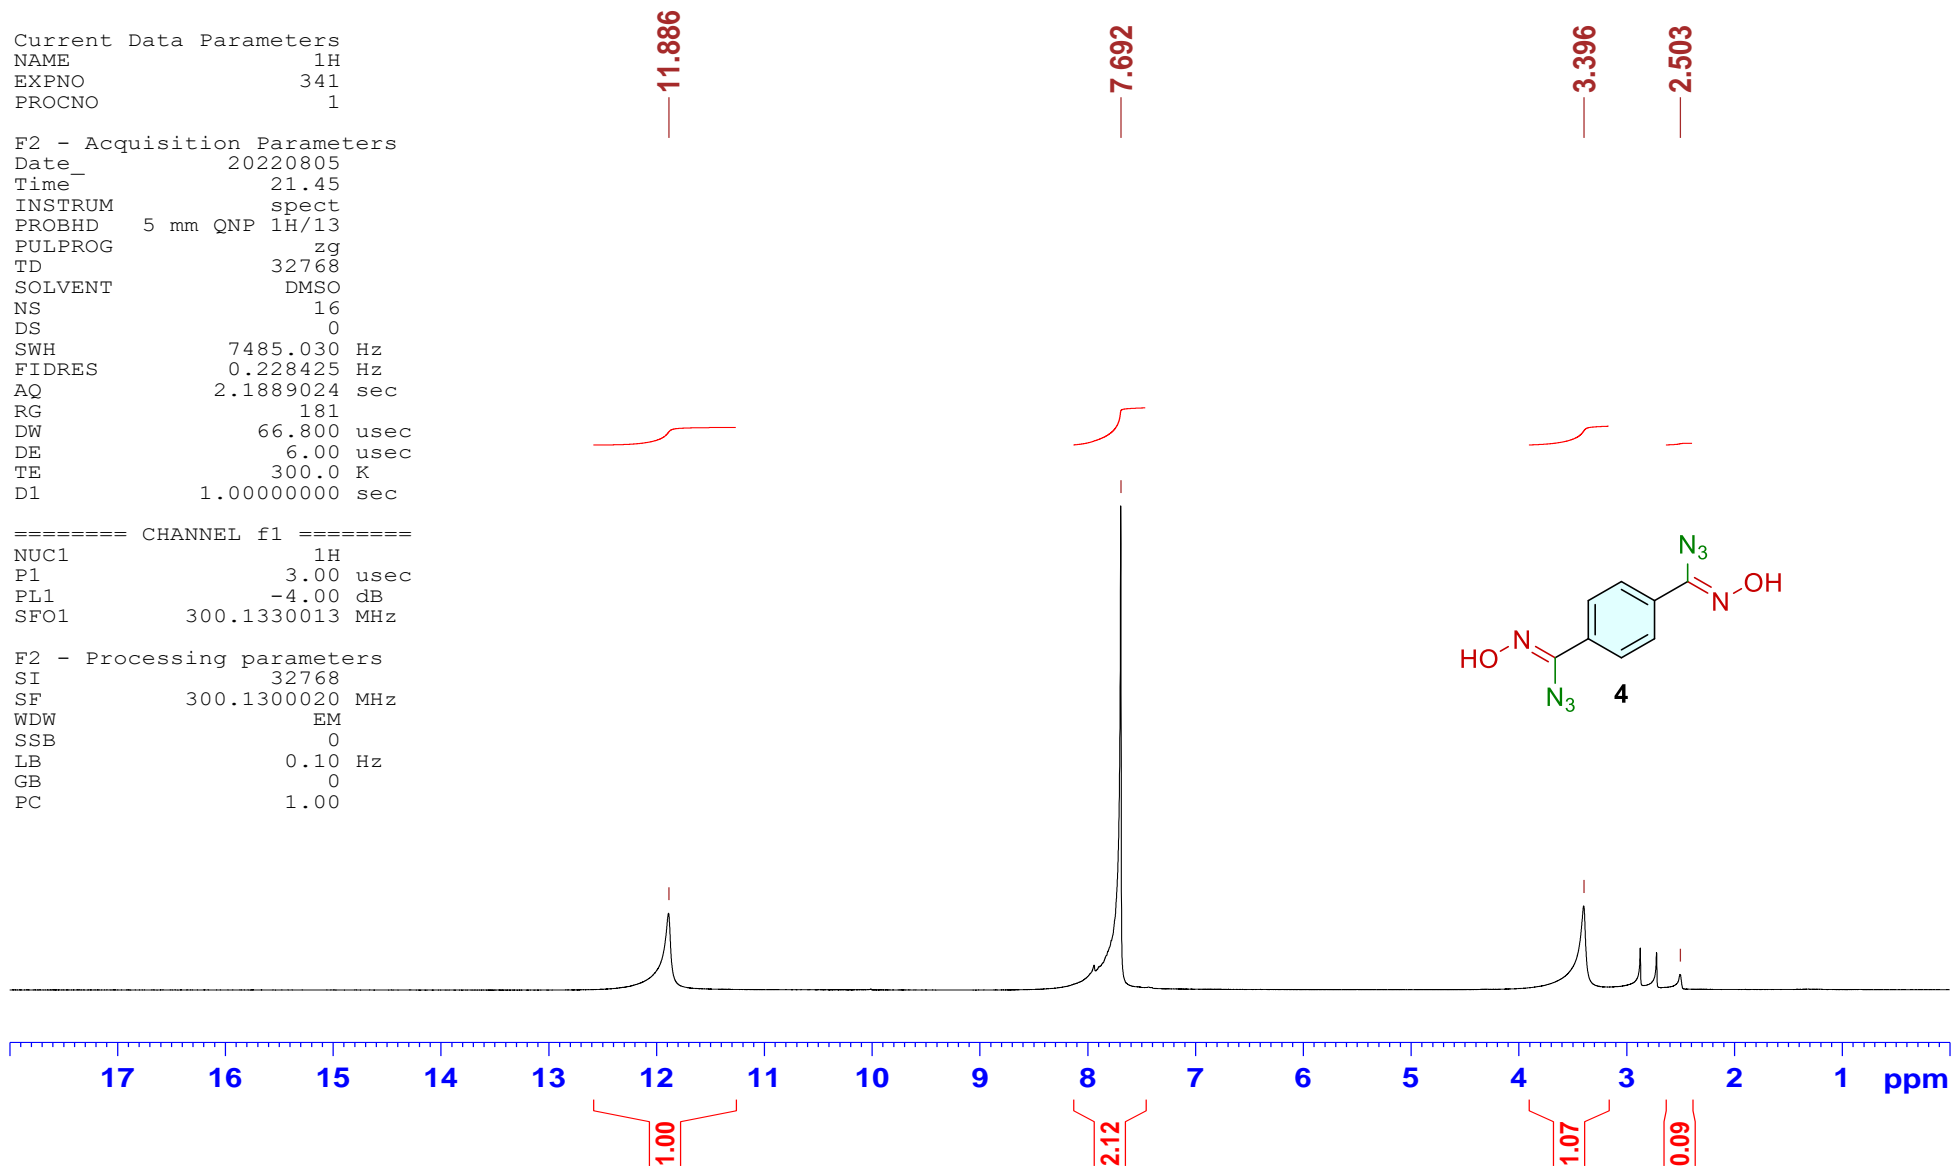

Figure S11. <sup>1</sup>H NMR Spectrum of Compound 4

Current Data Parameters  
NAME 13C  
EXPNO 341  
PROCNO 1

F2 - Acquisition Parameters  
Date\_ 20220805  
Time\_ 21.46  
INSTRUM spect  
PROBHD 5 mm QNP 1H/13  
PULPROG zgpg  
TD 32768  
SOLVENT DMSO  
NS 94  
DS 0  
SWH 19960.080 Hz  
FIDRES 0.609133 Hz  
AQ 0.8208384 sec  
RG 20642.5  
DW 25.050 usec  
DE 6.00 usec  
TE 300.0 K  
D1 1.00000000 sec  
d11 0.03000000 sec  
d12 0.00002000 sec

==== CHANNEL f1 =====  
NUC1 13C  
P1 4.00 usec  
PL1 -5.00 dB  
SFO1 75.4760505 MHz

==== CHANNEL f2 =====  
CPDPRG[2] waltz16  
NUC2 1H  
PCPD2 100.00 usec  
PL2 120.00 dB  
PL12 17.00 dB  
PL13 17.00 dB  
SFO2 300.1312005 MHz

F2 - Processing parameters  
SI 32768  
SF 75.4677830 MHz  
WDW EM  
SSB 0  
LB 3.00 Hz  
GB 0  
PC 1.40

140.96  
132.04  
125.72

JMS-SOHAN-336-13C

40.06  
39.79  
39.51  
39.23  
38.95  
38.68

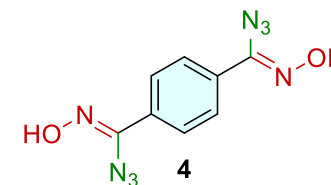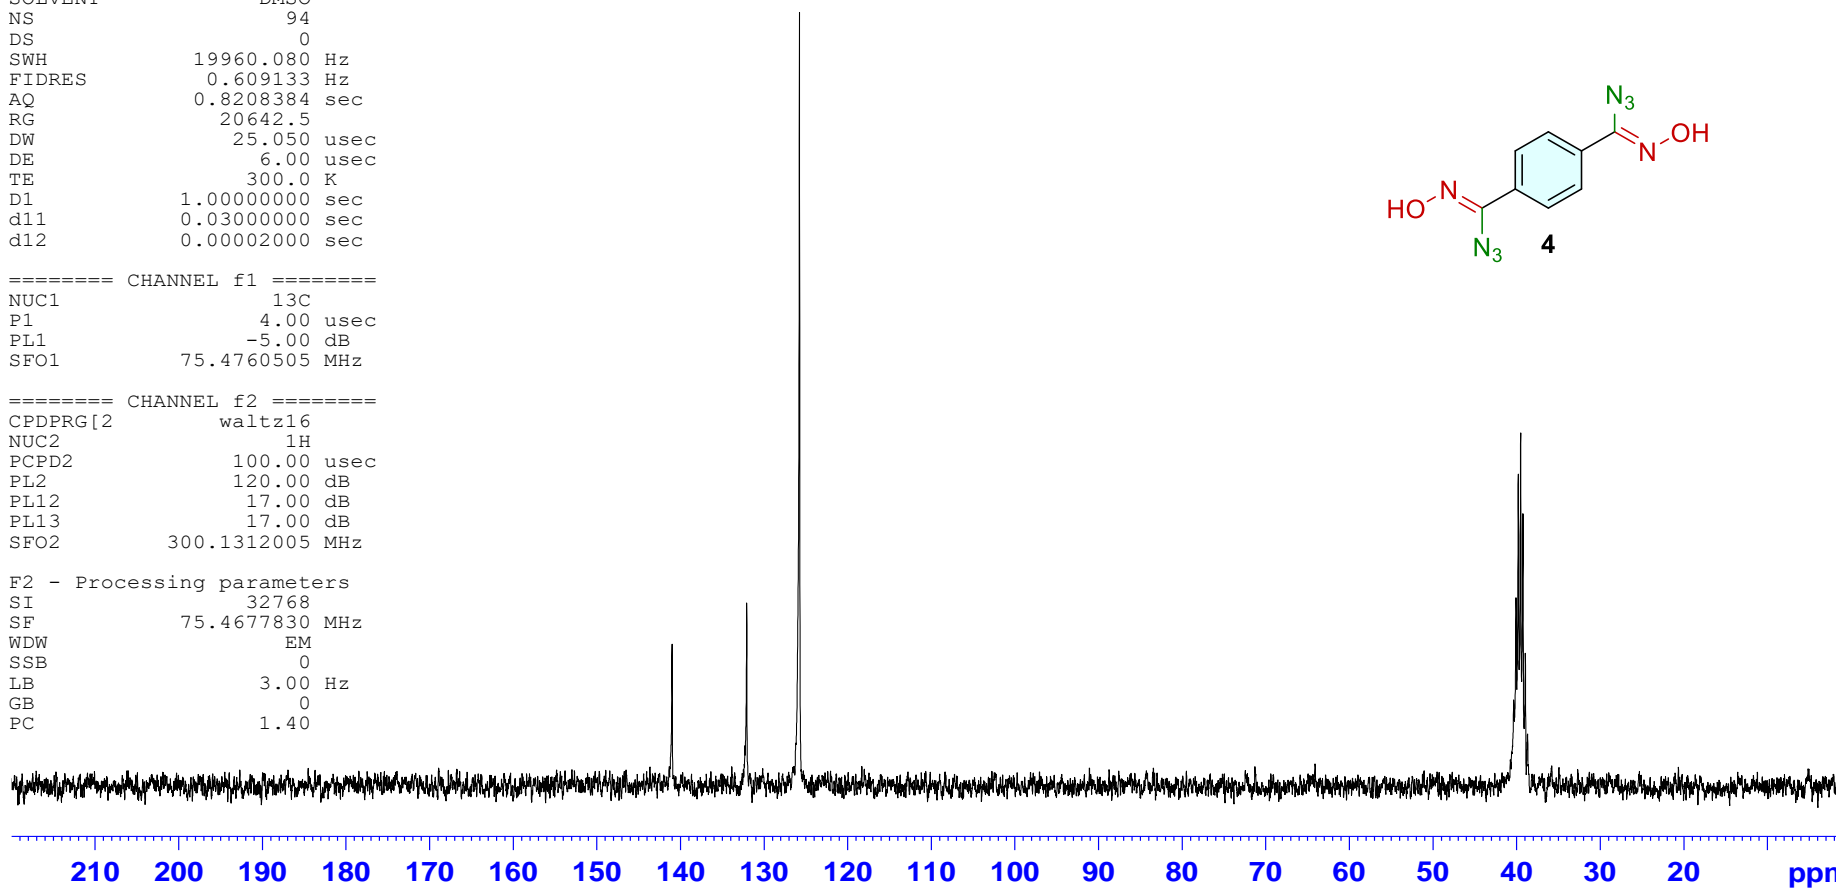

Figure S12. <sup>13</sup>C NMR Spectrum of Compound 4

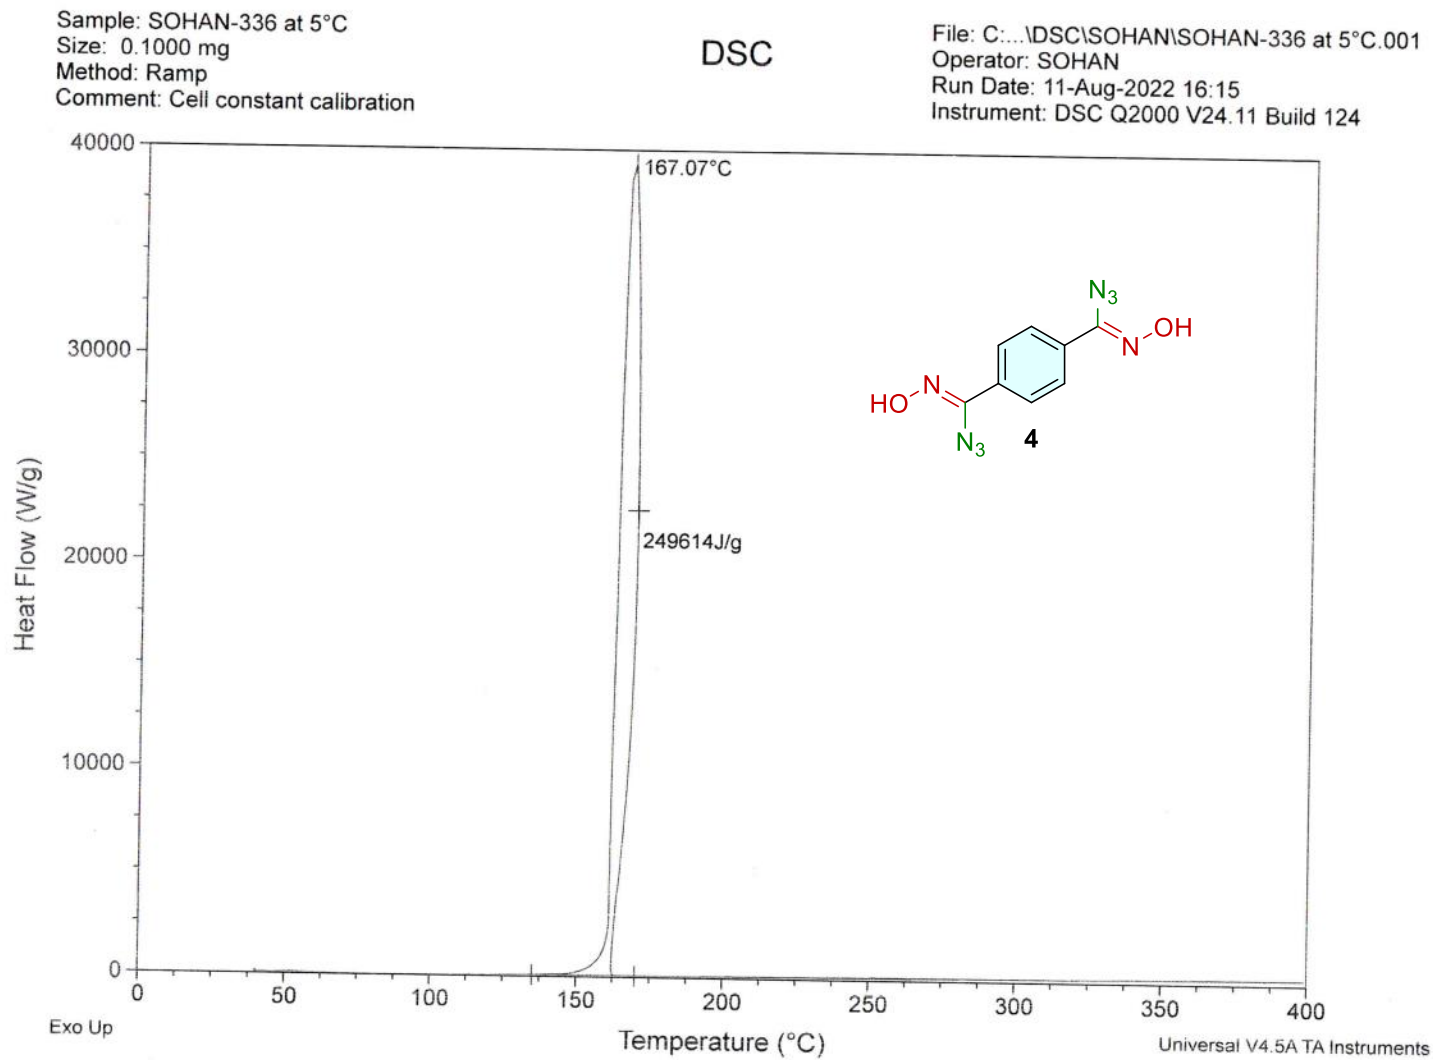

**Figure S13.** DSC of compound **4** at 5 °C min<sup>-1</sup>

Sample: SOHAN-336 at 5°C  
Size: 2.6280 mg  
Method: Ramp

TGA

File: C:\...TGA\Sohan\SOHAN-336 at 5°C.001  
Operator: SOHAN  
Run Date: 11-Aug-2022 16:29  
Instrument: TGA Q50 V20.13 Build 39

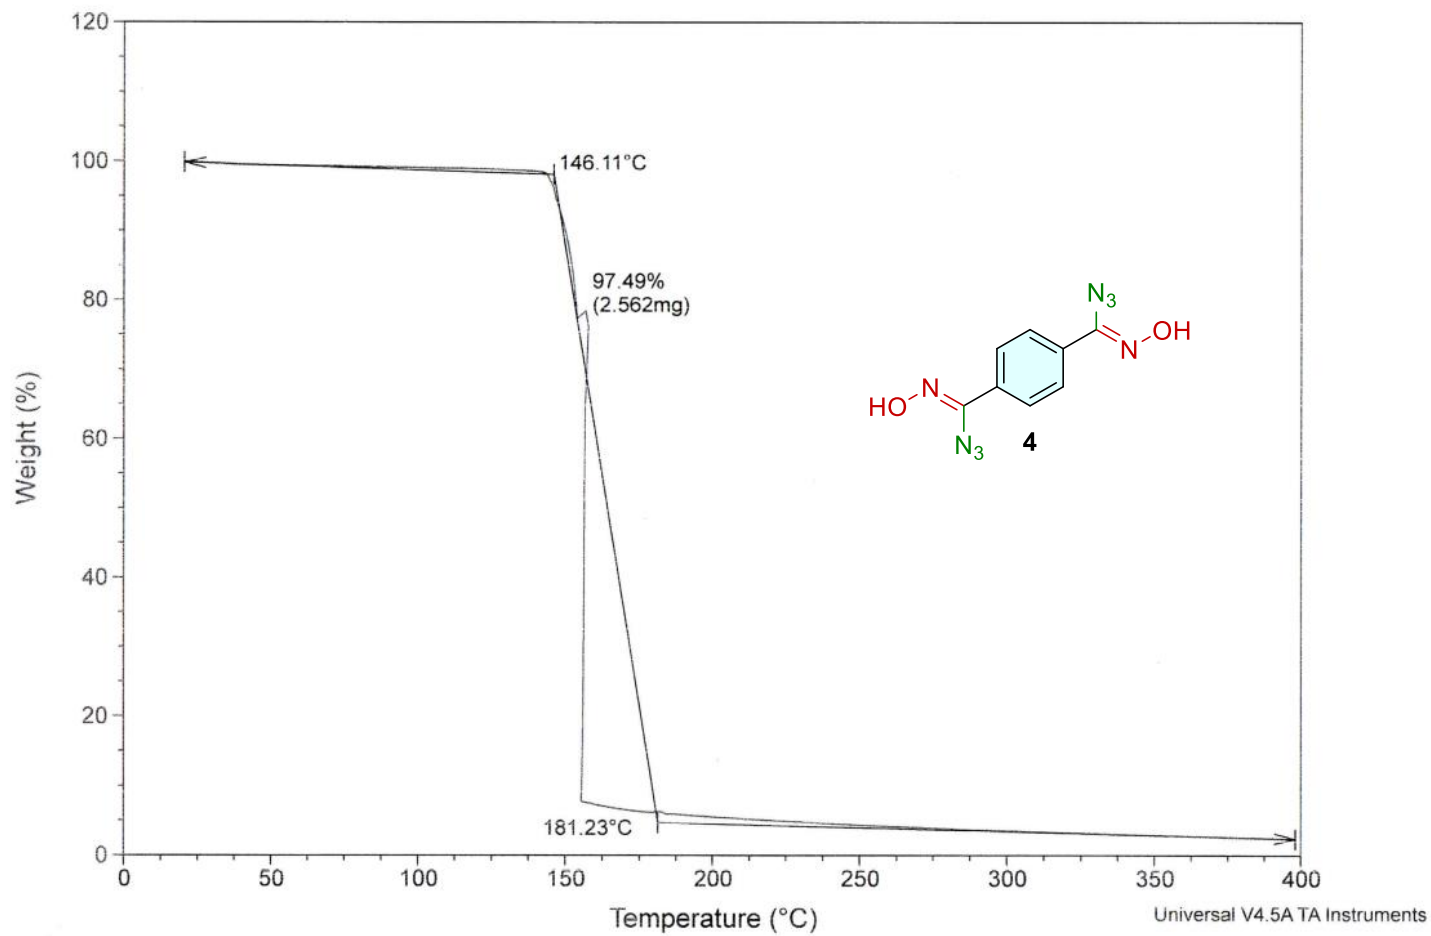

Figure S14. TGA of compound 4 at 5 °C min<sup>-1</sup>



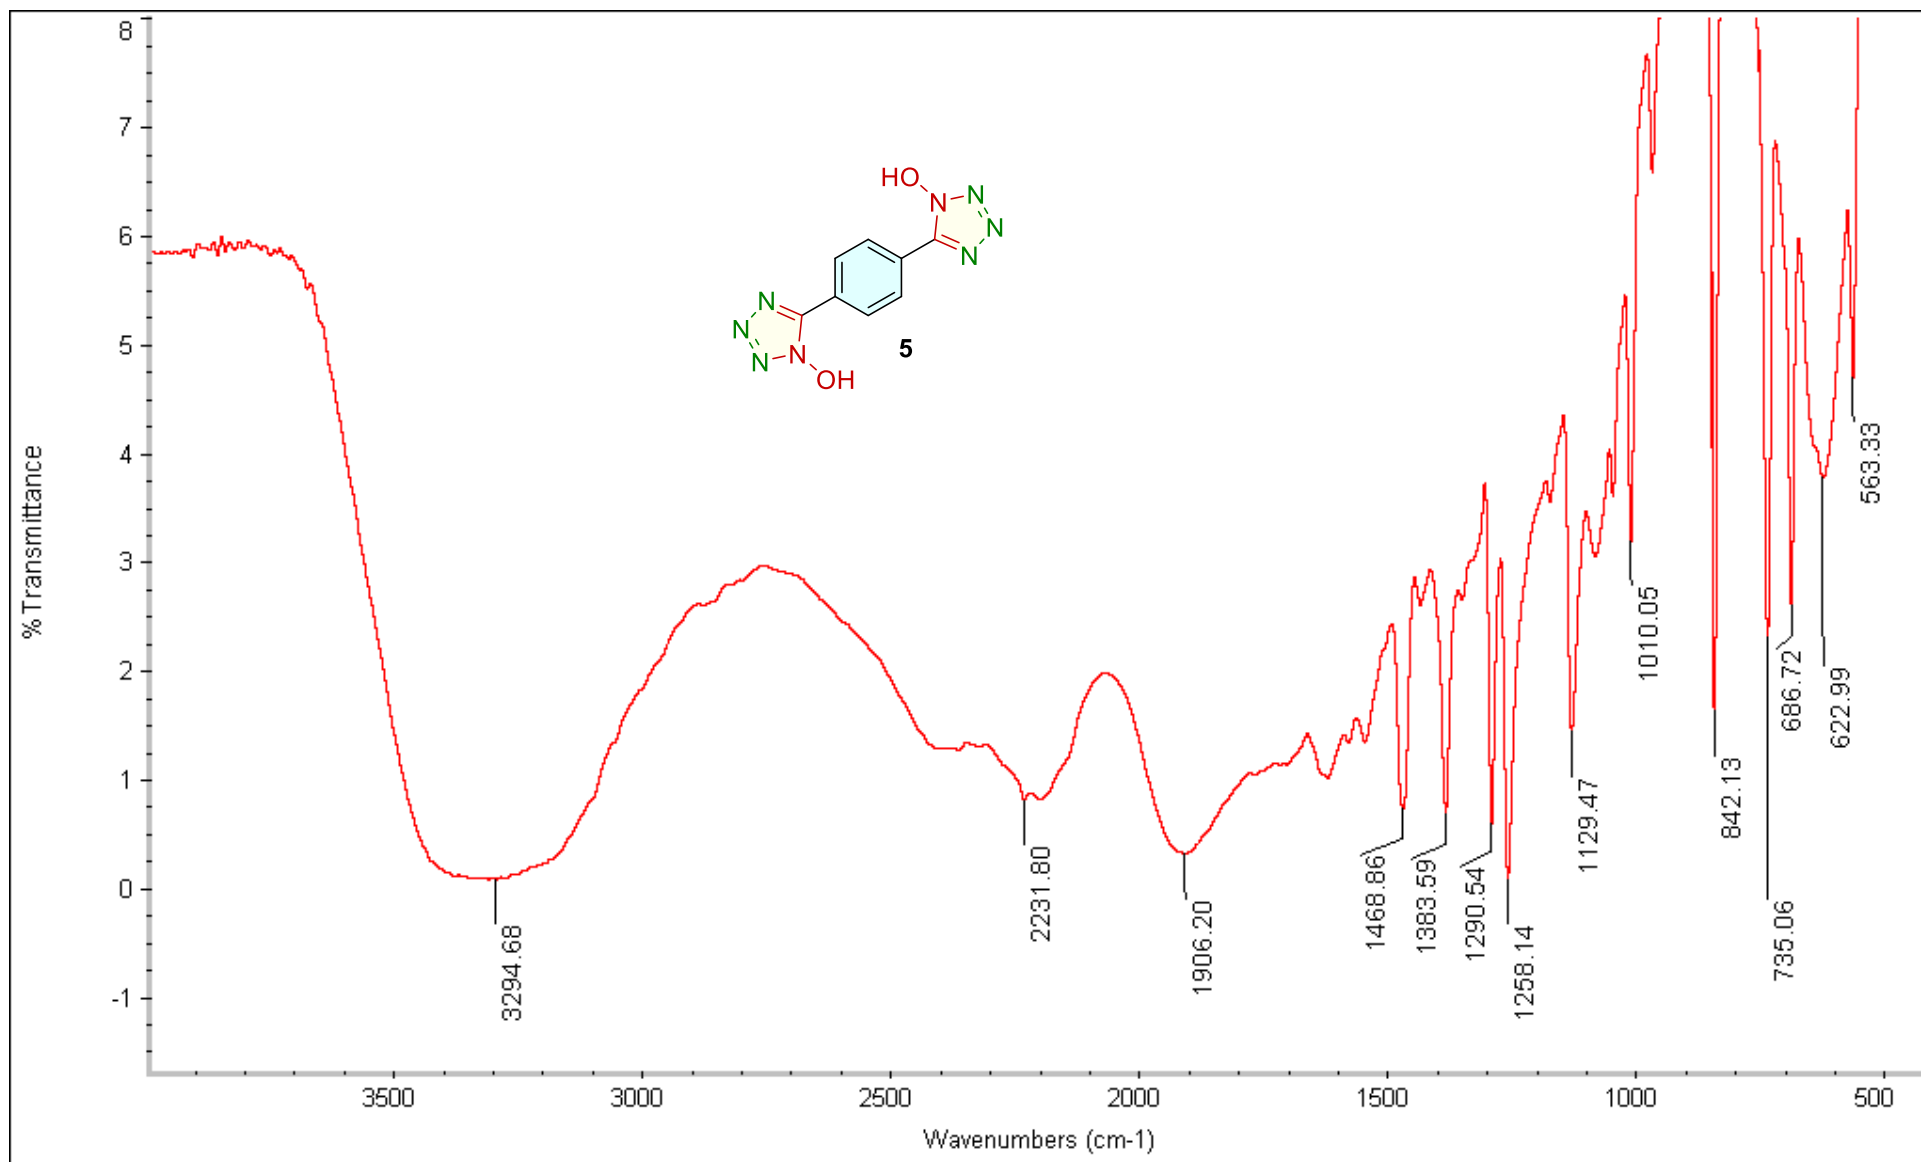

Figure S15. FTIR-Spectrum of Compound 5

Current Data Parameters  
NAME 1H  
EXPNO 351  
PROCNO 1

F2 - Acquisition Parameters  
Date\_ 20220817  
Time\_ 13.29  
INSTRUM spect  
PROBHD 5 mm QNP 1H/13  
PULPROG zg  
TD 32768  
SOLVENT DMSO  
NS 16  
DS 0  
SWH 7485.030 Hz  
FIDRES 0.228425 Hz  
AQ 2.1889024 sec  
RG 161.3  
DW 66.800 usec  
DE 6.00 usec  
TE 300.0 K  
D1 1.00000000 sec

==== CHANNEL f1 =====  
NUC1 1H  
P1 3.00 usec  
PL1 -4.00 dB  
SFO1 300.1330013 MHz

F2 - Processing parameters  
SI 32768  
SF 300.1300014 MHz  
WDW EM  
SSB 0  
LB 0.10 Hz  
GB 0  
PC 1.00

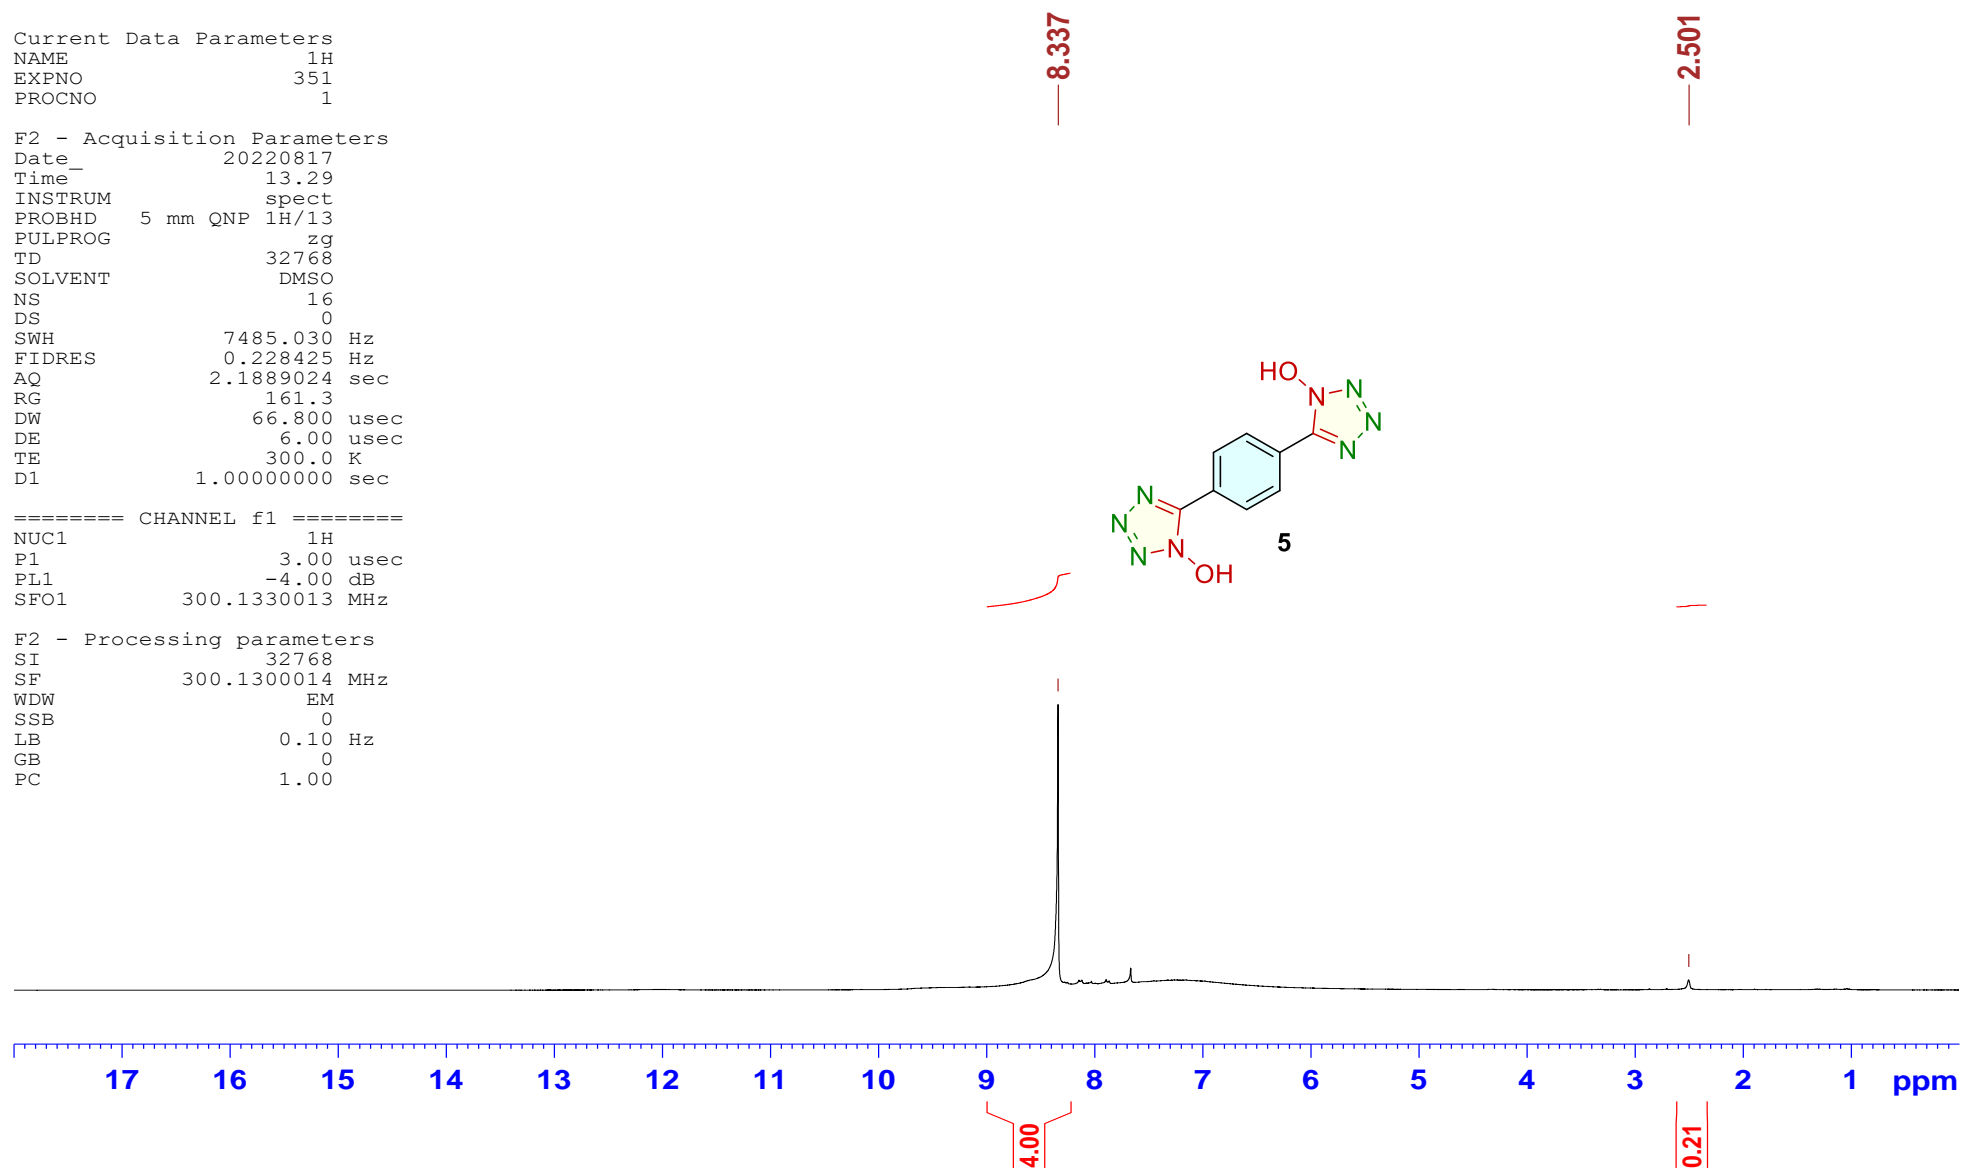

Figure S16. <sup>1</sup>H NMR Spectrum of Compound 5

Current Data Parameters  
NAME 13C  
EXPNO 350  
PROCNO 1

F2 - Acquisition Parameters  
Date\_ 20220817  
Time\_ 13.30  
INSTRUM spect  
PROBHD 5 mm QNP 1H/13  
PULPROG zgpg  
TD 32768  
SOLVENT DMSO  
NS 343  
DS 0  
SWH 19960.080 Hz  
FIDRES 0.609133 Hz  
AQ 0.8208384 sec  
RG 20642.5  
DW 25.050 usec  
DE 6.00 usec  
TE 300.0 K  
D1 1.00000000 sec  
d11 0.03000000 sec  
d12 0.00002000 sec

==== CHANNEL f1 =====  
NUC1 13C  
P1 4.00 usec  
PL1 -5.00 dB  
SFO1 75.4760505 MHz

==== CHANNEL f2 =====  
CPDPRG[2] waltz16  
NUC2 1H  
PCPD2 100.00 usec  
PL2 120.00 dB  
PL12 17.00 dB  
PL13 17.00 dB  
SFO2 300.1312005 MHz

F2 - Processing parameters  
SI 32768  
SF 75.4677700 MHz  
WDW EM  
SSB 0  
LB 1.00 Hz  
GB 0  
PC 1.40

JMS-SOHAN-341-13C

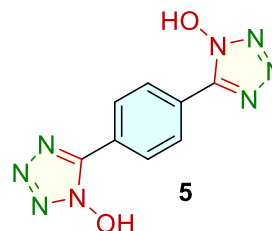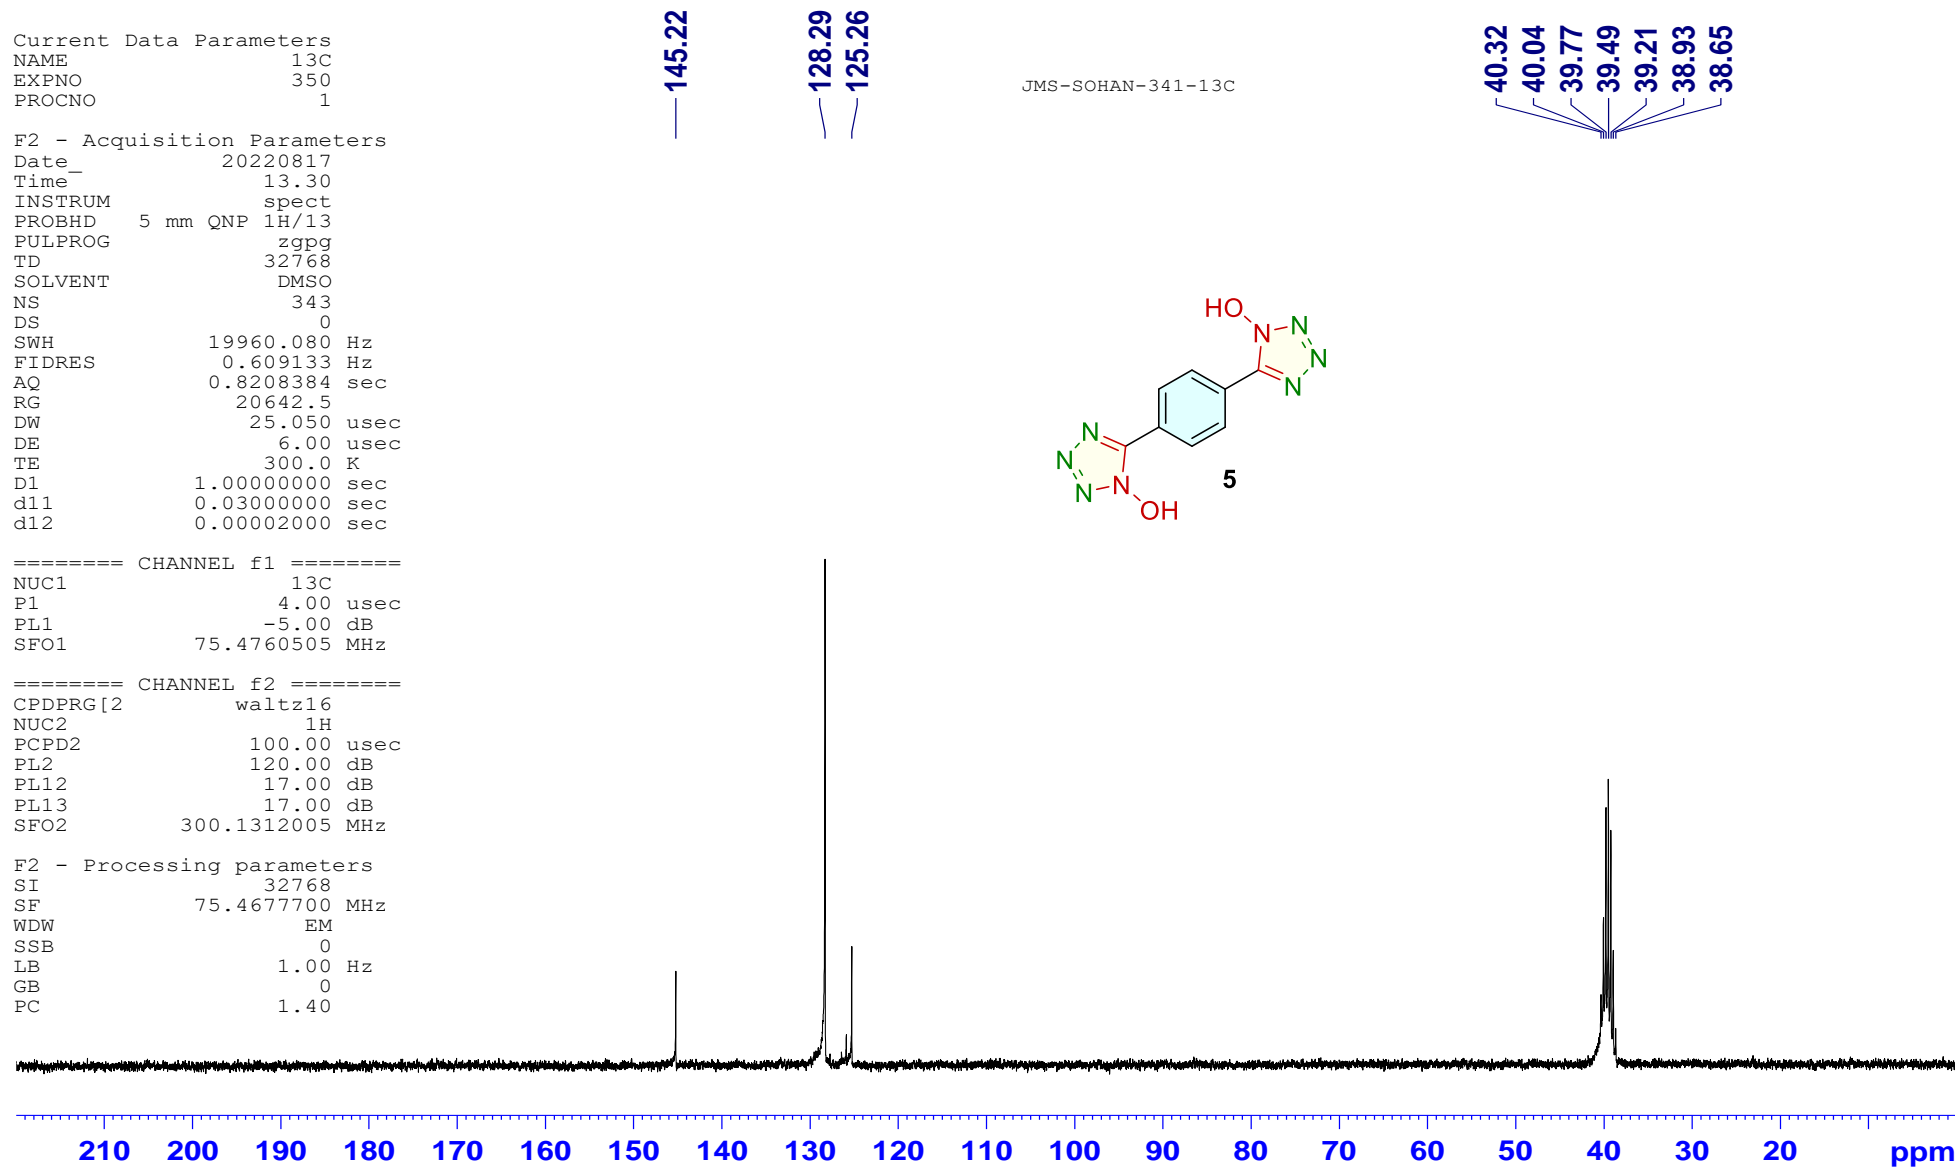

Figure S17. <sup>13</sup>C NMR Spectrum of Compound 5

Current Data Parameters  
NAME DEPT135  
EXPNO 102  
PROCNO 1

F2 - Acquisition Parameters  
Date\_ 20220817  
Time\_ 13.42  
INSTRUM spect  
PROBHD 5 mm QNP 1H/13  
PULPROG dept135  
TD 32768  
SOLVENT DMSO  
NS 92  
DS 16  
SWH 19960.080 Hz  
FIDRES 0.609133 Hz  
AQ 0.8208384 sec  
RG 18390.4  
DW 25.050 usec  
DE 6.00 usec  
TE 300.0 K  
CNST2 140.0000000  
D1 2.000000000 sec  
d2 0.00357143 sec  
d12 0.00002000 sec  
DELTA 0.00000891 sec

==== CHANNEL f1 =====  
NUC1 13C  
P1 7.00 usec  
p2 14.00 usec  
PL1 -5.00 dB  
SFO1 75.4760505 MHz

==== CHANNEL f2 =====  
NUC2 1H  
P3 6.10 usec  
p4 12.20 usec  
PCPD2 100.00 usec  
PL2 -6.00 dB  
PL12 18.54 dB  
SFO2 300.1312005 MHz

F2 - Processing parameters  
SI 32768  
SF 75.4677703 MHz  
WDW EM  
SSB 0  
LB 1.00 Hz  
GB 0  
PC 1.40

128.29

JMS-SOHAN-341-DEPT135

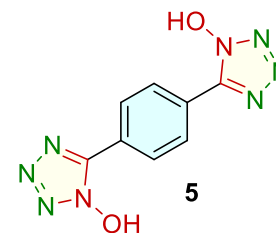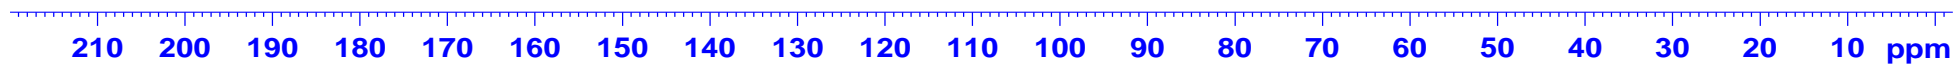

Figure S18. <sup>13</sup>C-DEPT135 NMR Spectrum of Compound 5

Sample: SOHAN-341 at 5°C  
Size: 0.1000 mg  
Method: Ramp  
Comment: Cell constant calibration

DSC

File: C:\...\DSC\SOHAN\SOHAN-341 at 5°C.001  
Operator: SOHAN  
Run Date: 21-Aug-2022 20:21  
Instrument: DSC Q2000 V24.11 Build 124

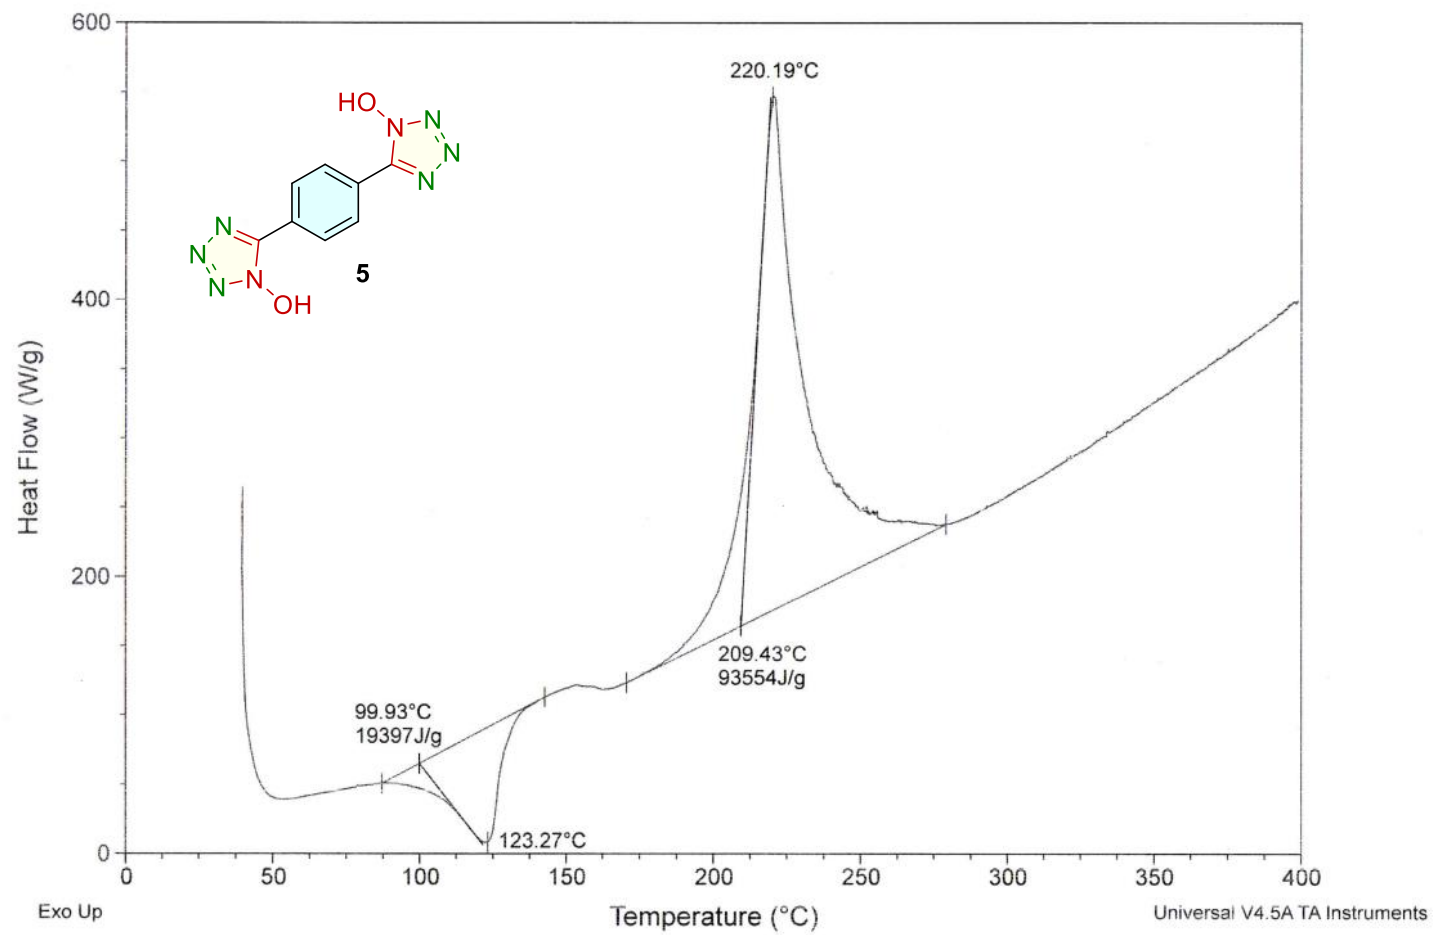

Figure S19. DSC of compound 5 at 5 °C min<sup>-1</sup>

Sample: SOHAN-341 at 5°C  
Size: 2.1810 mg  
Method: Ramp

### TGA

File: C:\...TGA\Sohan\SOHAN-341 at 5°C.001  
Operator: SOHAN  
Run Date: 21-Aug-2022 20:37  
Instrument: TGA Q50 V20.13 Build 39

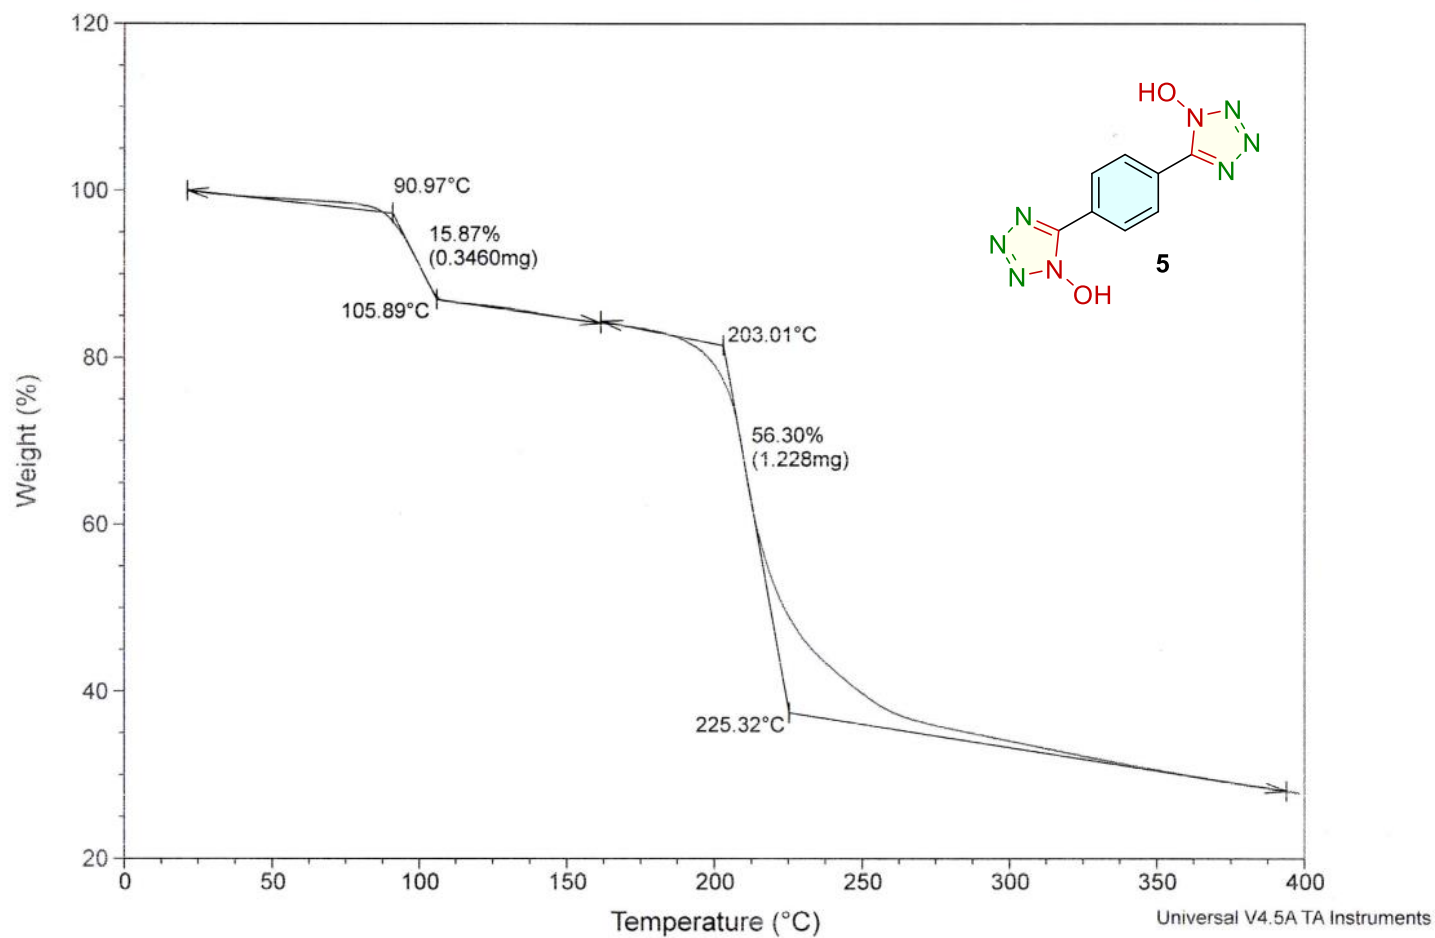

Figure S20. TGA of compound 5 at 5 °C min<sup>-1</sup>

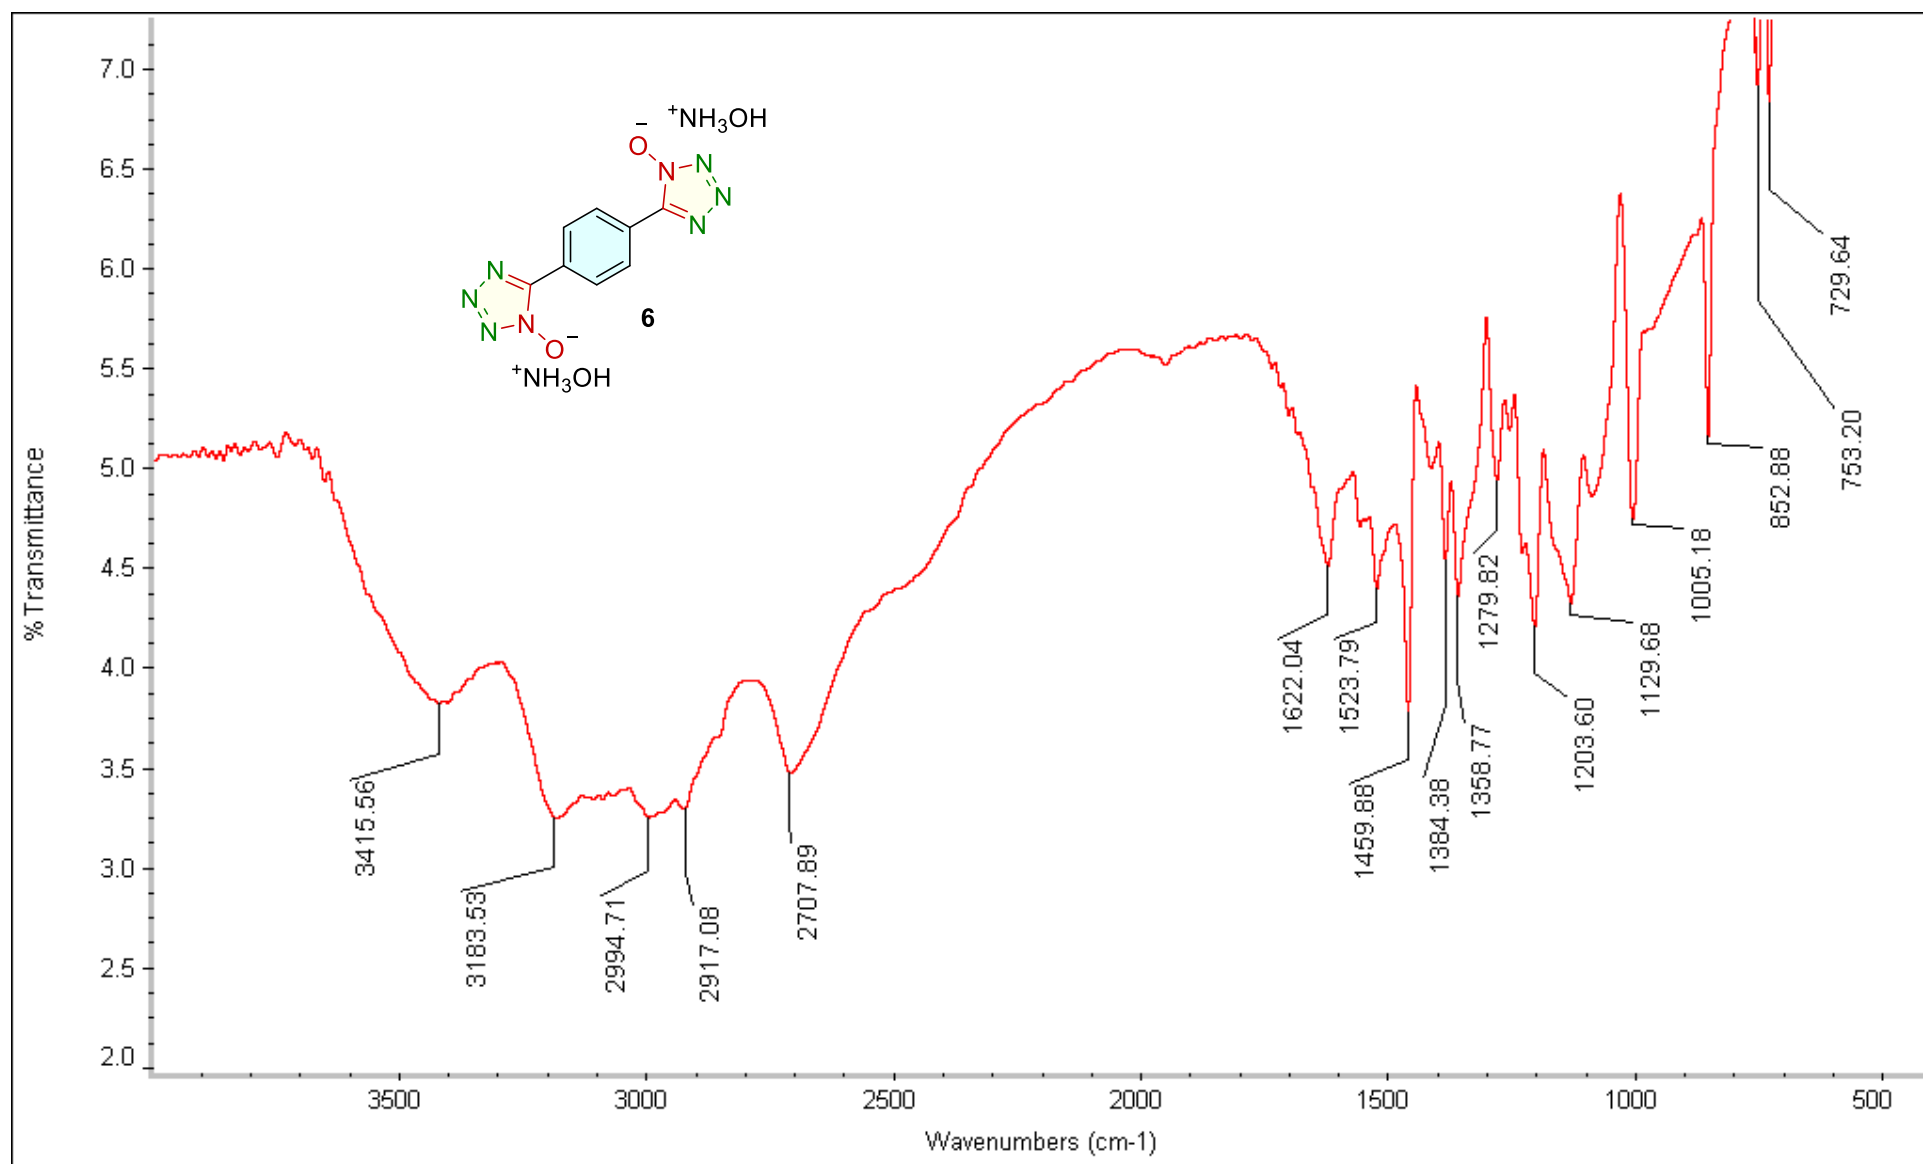

Figure S21. FTIR-Spectrum of Compound 6

Current Data Parameters  
NAME 1H  
EXPNO 363  
PROCNO 1

F2 - Acquisition Parameters  
Date\_ 20220826  
Time\_ 21.29  
INSTRUM spect  
PROBHD 5 mm QNP 1H/13  
PULPROG zg  
TD 32768  
SOLVENT DMSO  
NS 16  
DS 0  
SWH 7485.030 Hz  
FIDRES 0.228425 Hz  
AQ 2.1889024 sec  
RG 256  
DW 66.800 usec  
DE 6.00 usec  
TE 300.0 K  
D1 1.00000000 sec

==== CHANNEL f1 =====  
NUC1 1H  
P1 3.00 usec  
PL1 -4.00 dB  
SFO1 300.1330013 MHz

F2 - Processing parameters  
SI 32768  
SF 300.1300014 MHz  
WDW EM  
SSB 0  
LB 0.10 Hz  
GB 0  
PC 1.00

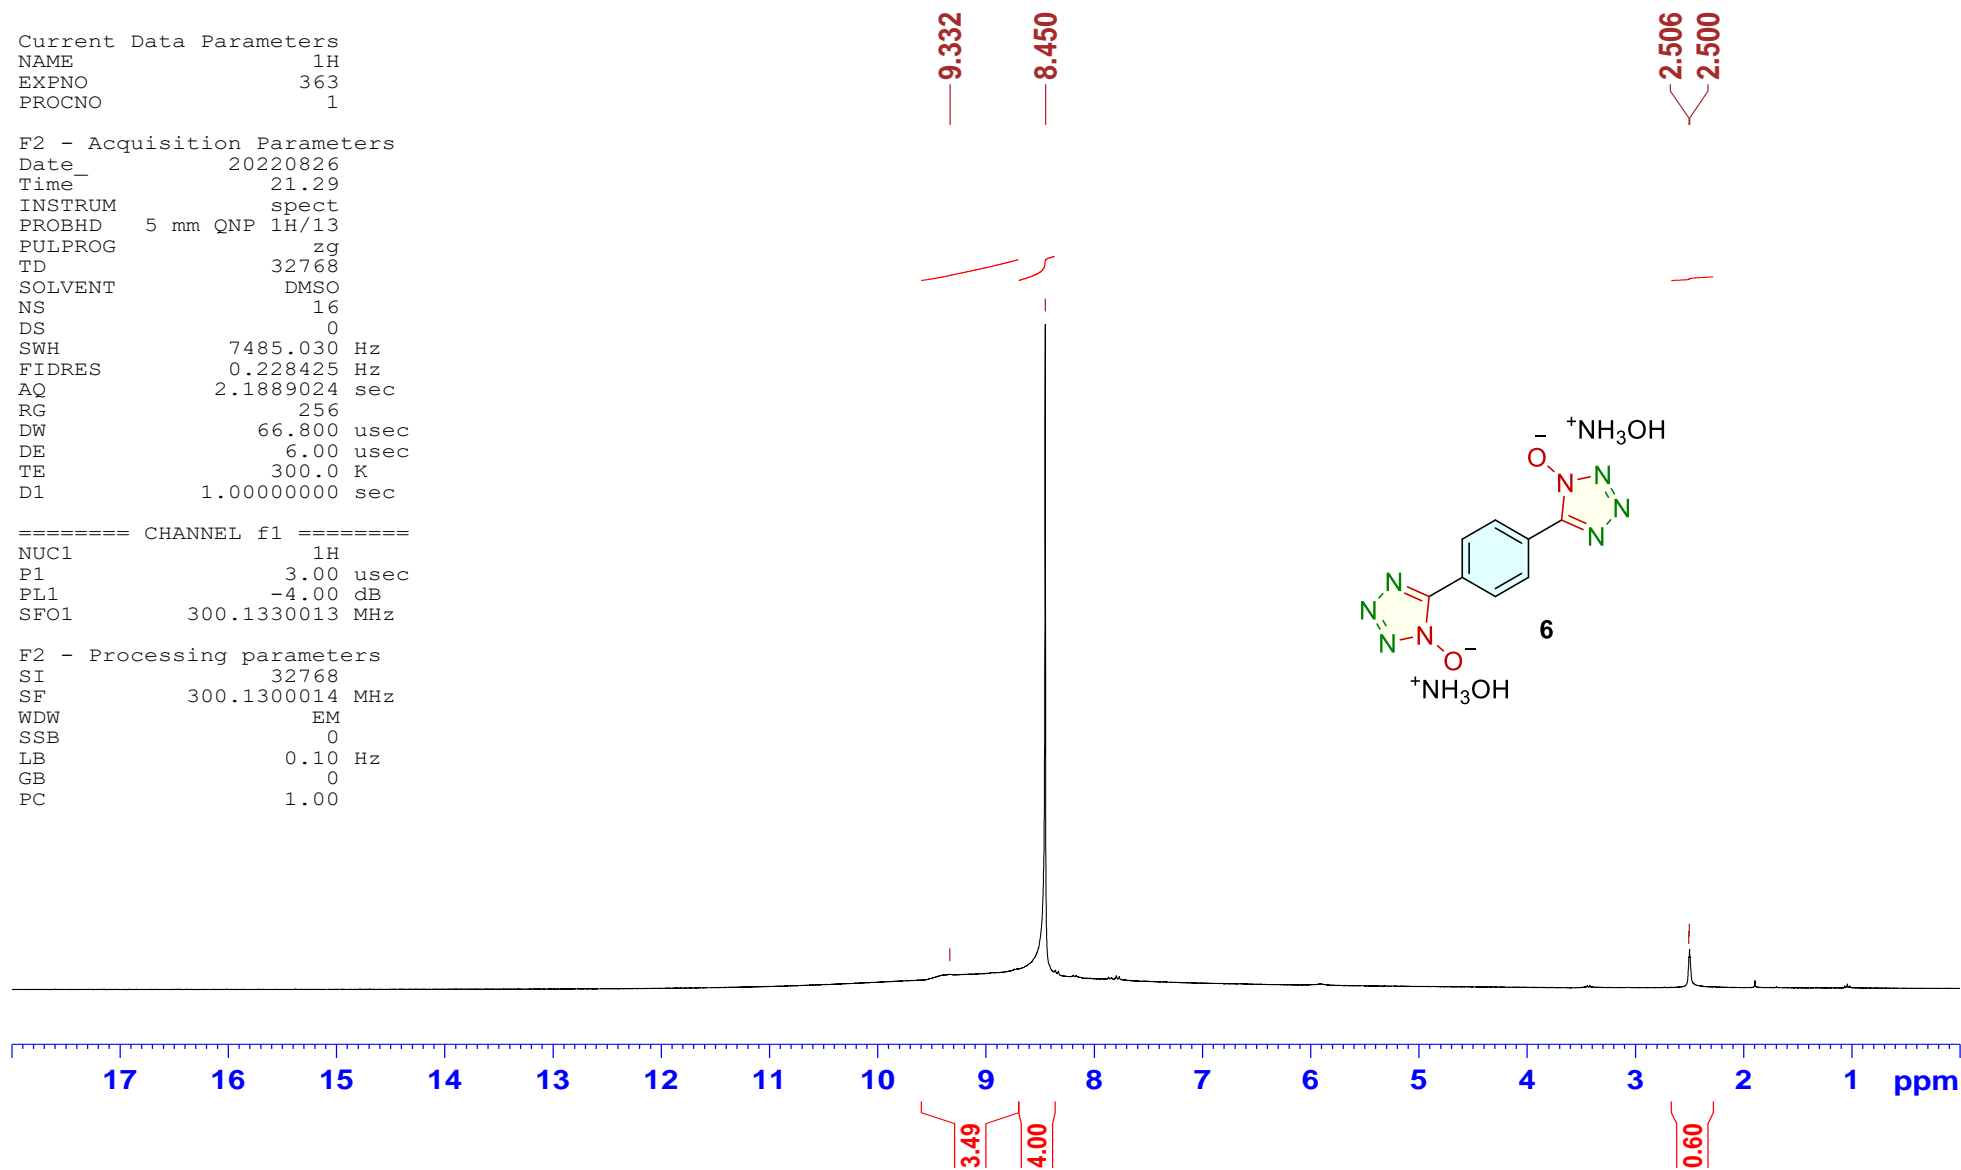

Figure S22. <sup>1</sup>H NMR Spectrum of Compound 6



Current Data Parameters  
NAME 13C  
EXPNO 363  
PROCNO 1

F2 - Acquisition Parameters

Date\_ 20220826  
Time\_ 21.33  
INSTRUM spect  
PROBHD 5 mm QNP 1H/13  
PULPROG zgpg  
TD 32768  
SOLVENT DMSO  
NS 229  
DS 0  
SWH 19960.080 Hz  
FIDRES 0.609133 Hz  
AQ 0.8208384 sec  
RG 20642.5  
DW 25.050 usec  
DE 6.00 usec  
TE 300.0 K  
D1 1.00000000 sec  
d11 0.03000000 sec  
d12 0.00002000 sec

==== CHANNEL f1 =====

NUC1 13C  
P1 4.00 usec  
PL1 -5.00 dB  
SFO1 75.4760505 MHz

==== CHANNEL f2 =====

CPDPRG[2] waltz16  
NUC2 1H  
PCPD2 100.00 usec  
PL2 120.00 dB  
PL12 17.00 dB  
PL13 17.00 dB  
SFO2 300.1312005 MHz

F2 - Processing parameters

SI 32768  
SF 75.4677812 MHz  
WDW EM  
SSB 0  
LB 0.50 Hz  
GB 0

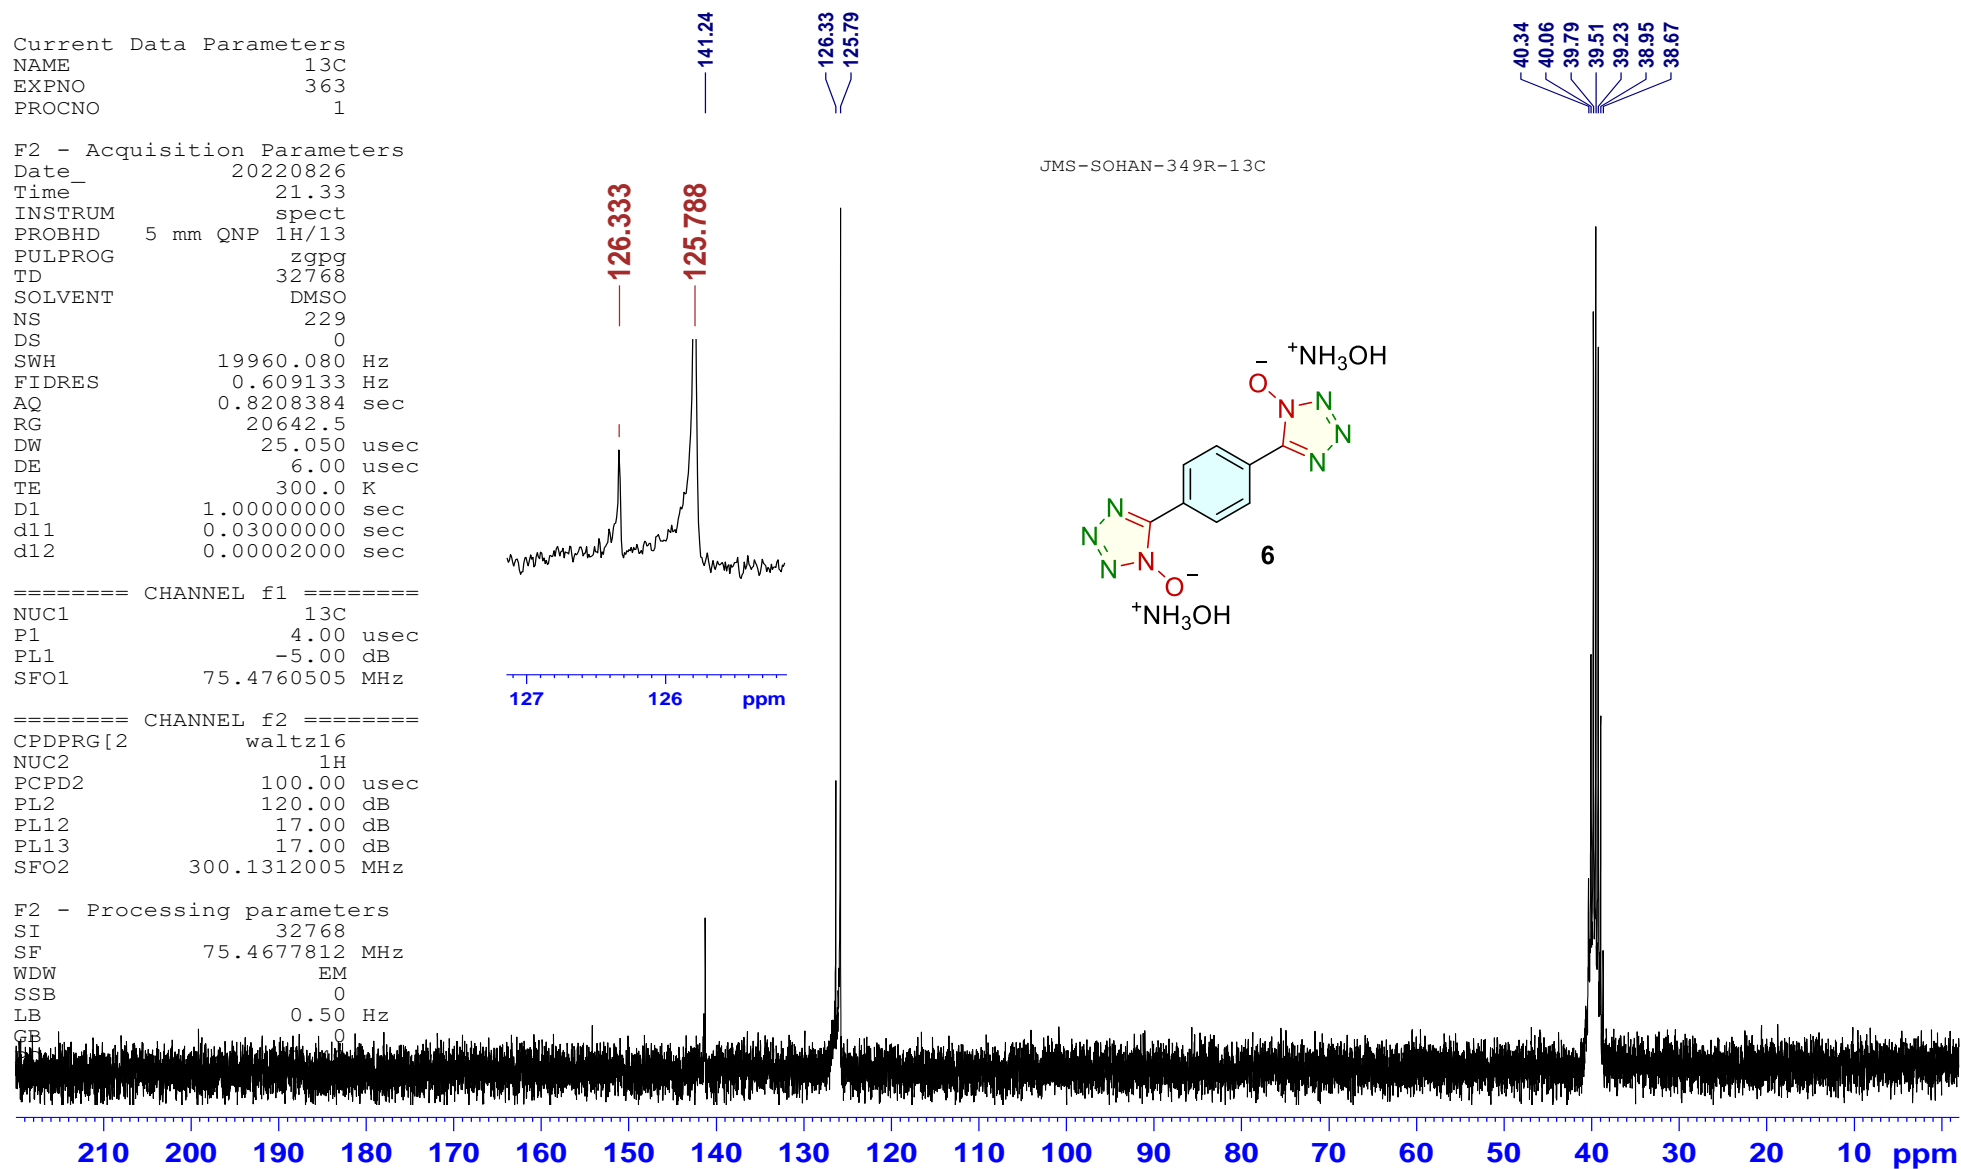

Figure S23. <sup>13</sup>C NMR Spectrum of Compound 6

Current Data Parameters  
NAME DEPT135  
EXPNO 105  
PROCNO 1

F2 - Acquisition Parameters  
Date\_ 20220820  
Time\_ 11.52  
INSTRUM spect  
PROBHD 5 mm QNP 1H/13  
PULPROG dept135  
TD 32768  
SOLVENT DMSO  
NS 36  
DS 16  
SWH 19960.080 Hz  
FIDRES 0.609133 Hz  
AQ 0.8208384 sec  
RG 18390.4  
DW 25.050 usec  
DE 6.00 usec  
TE 300.0 K  
CNST2 140.0000000  
D1 2.000000000 sec  
d2 0.00357143 sec  
d12 0.00002000 sec  
DELTA 0.00000891 sec

==== CHANNEL f1 =====  
NUC1 13C  
P1 7.00 usec  
P2 14.00 usec  
==== CHANNEL f2 =====  
CPDPRG2 waltz16  
NUC2 1H  
P3 6.10 usec  
p4 12.20 usec  
PCPD2 100.00 usec  
PL2 -6.00 dB  
PL12 18.54 dB  
SFO2 300.1312005 MHz

F2 - Processing parameters  
SI 32768  
SF 75.4677790 MHz  
WDW EM  
SSB 0  
LB 1.00 Hz  
GB 0  
PC 1.40

125.79

JMS-SOHAN-349-DEPT135

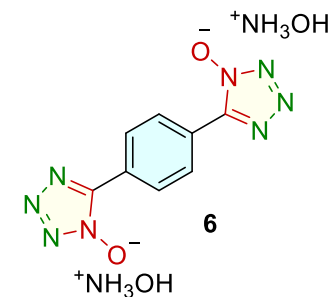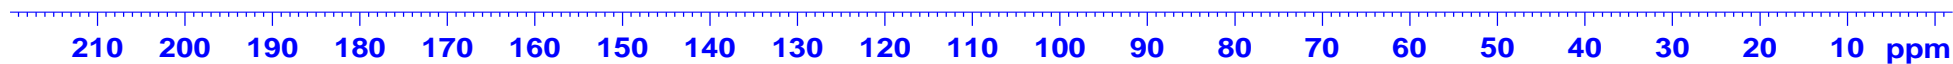

Figure S24. <sup>13</sup>C-DEPT135 NMR Spectrum of Compound 6

15N{1H}\_5861 Sohan 349

Current Data Parameters  
NAME New folder  
EXPNO 5861  
PROCNO 1

F2 - Acquisition Parameters

Date\_ 20220921  
Time\_ 17.00  
INSTRUM spect  
PROBHD 5 mm PABBO BB/  
PULPROG zgig  
TD 16248  
SOLVENT DMSO  
NS 5918  
DS 0  
SWH 34722.223 Hz  
FIDRES 2.137015 Hz  
AQ 0.2339712 sec  
RG 27.83  
DW 14.400 usec  
DE 8.00 usec  
TE 303.2 K  
D1 10.00000000 sec  
D11 0.03000000 sec  
TD0 10240

==== CHANNEL f1 =====

SFO1 50.6963210 MHz  
NUC1 15N  
P1 12.00 usec  
PLW1 155.00000000 W

==== CHANNEL f2 =====

SFO2 500.1920008 MHz  
NUC2 1H  
CPDPRG[2] waltz16  
PCPD2 80.00 usec  
PLW2 26.00000000 W  
PLW12 0.27649999 W

F2 - Processing parameters

SI 32768  
SF 50.7031345 MHz  
WDW EM  
SSB 0  
LB 3.00 Hz  
GB 0  
PC 0.20

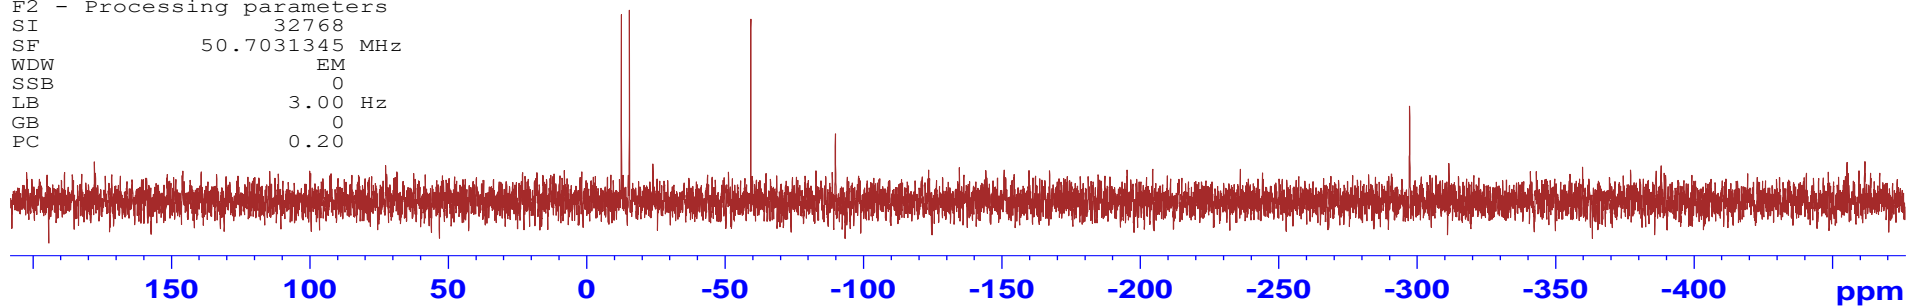

-12.64  
-15.51

-59.36

-89.93

-297.38

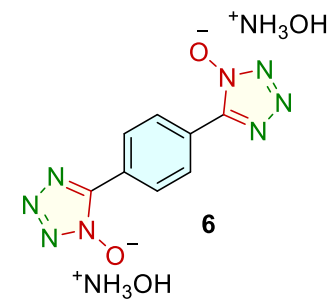

Figure S25. <sup>15</sup>N NMR Spectrum of Compound **6** in DMSO-d<sub>6</sub> (at 50.70 MHz)

Sample: SOHAN-349 at 5°C  
Size: 0.1000 mg  
Method: Ramp  
Comment: Cell constant calibration

DSC

File: C:\...DSC\SOHAN\SOHAN-349 at 5°C.001  
Operator: SOHAN  
Run Date: 21-Aug-2022 21:55  
Instrument: DSC Q2000 V24.11 Build 124

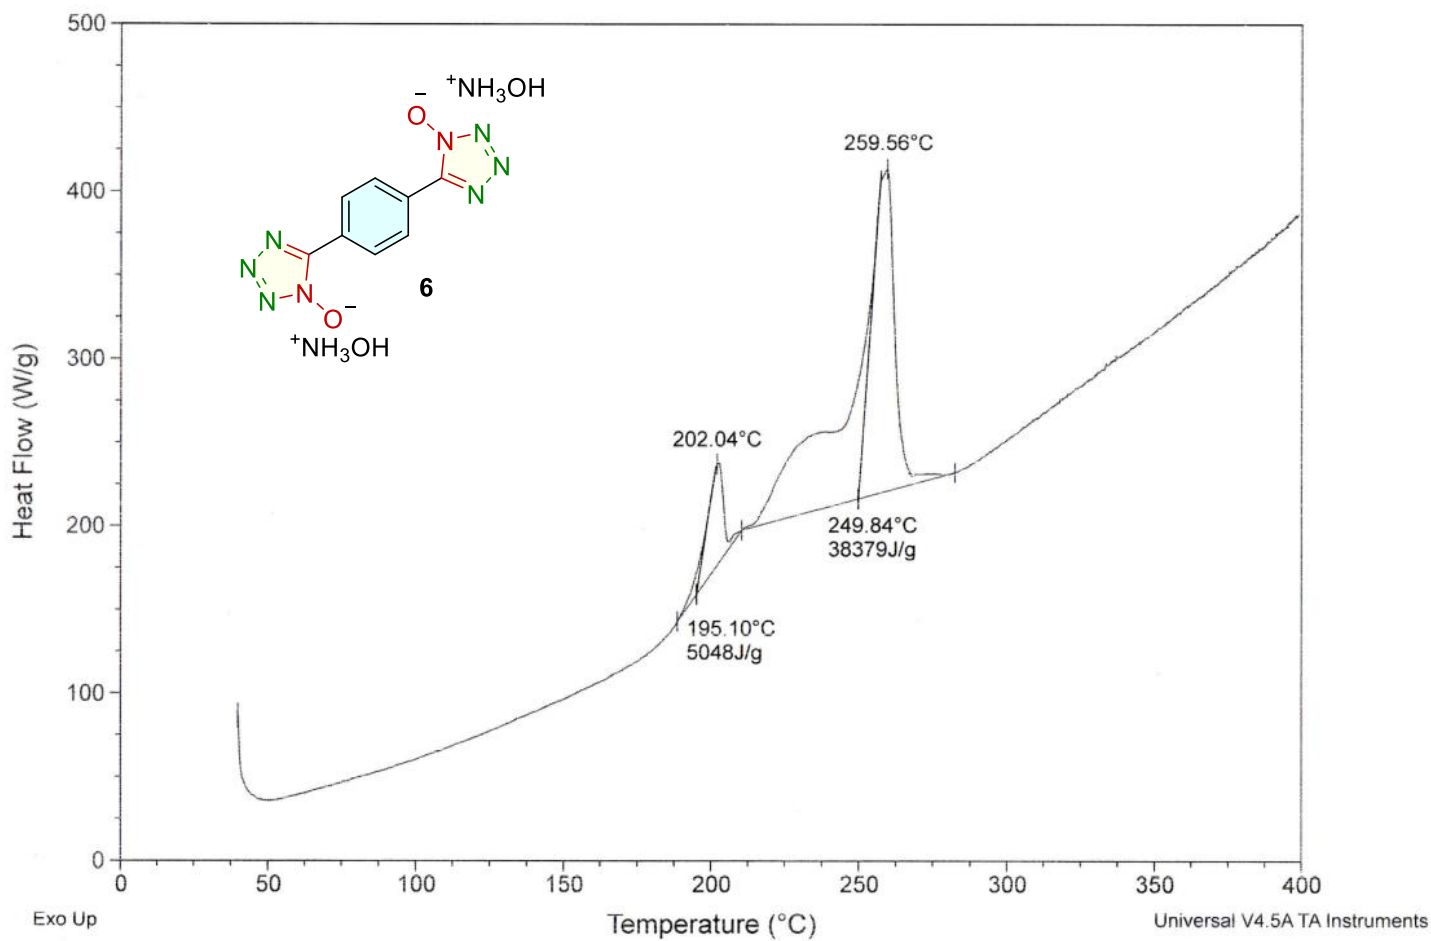

Figure S26. DSC of compound 6 at 5 °C min<sup>-1</sup>

Sample: SOHAN-349 at 5°C  
Size: 2.2080 mg  
Method: Ramp

TGA

File: C:\...TGA\Sohan\SOHAN-349 at 5°C.001  
Operator: SOHAN  
Run Date: 21-Aug-2022 22:39  
Instrument: TGA Q50 V20.13 Build 39

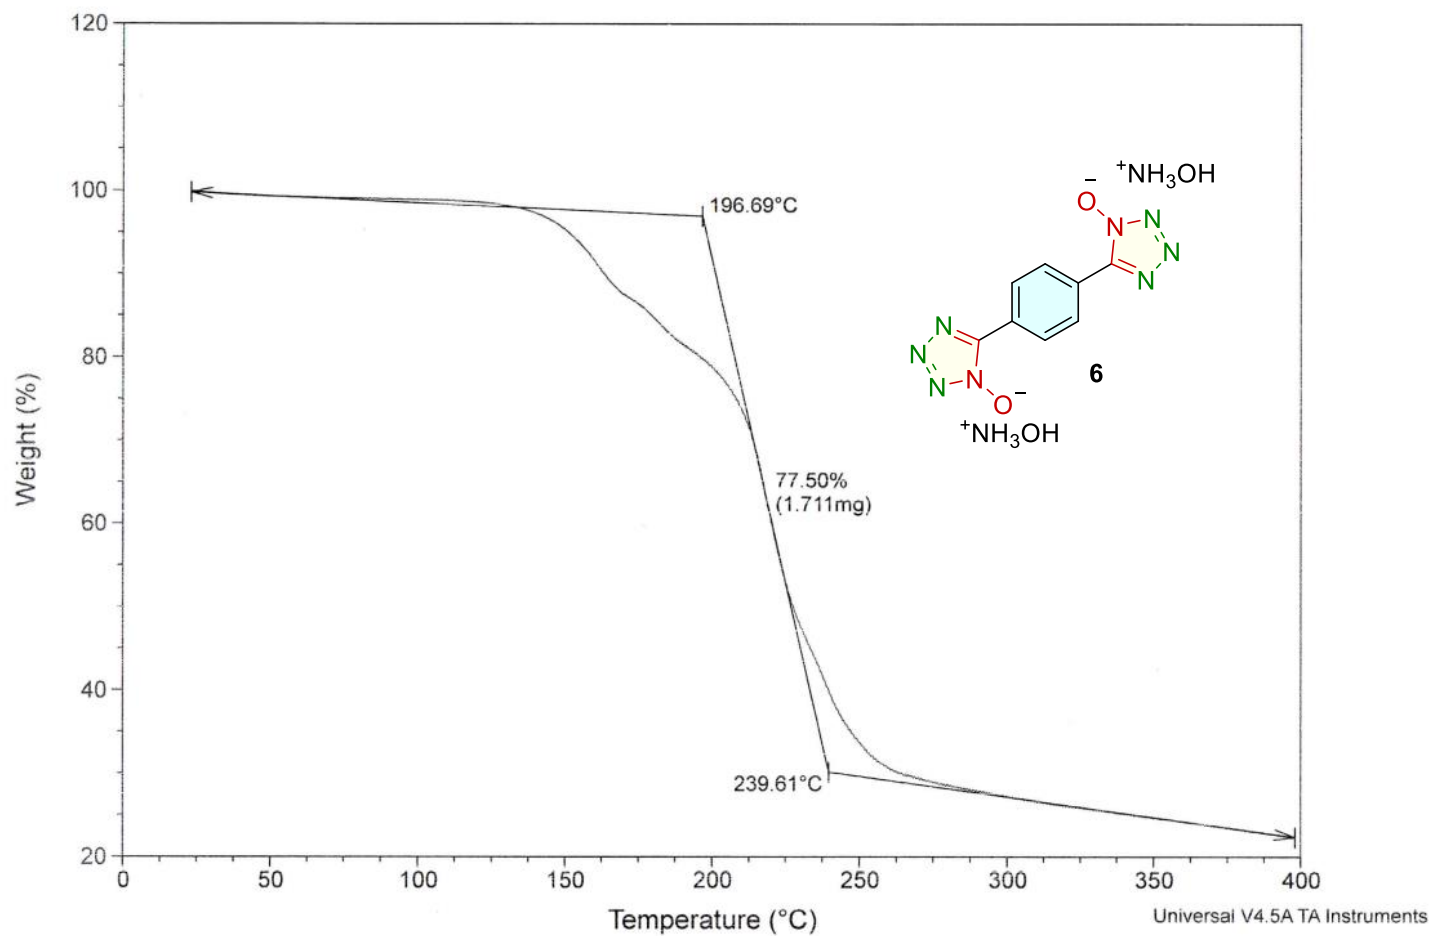

Figure S27. TGA of compound 6 at 5 °C min<sup>-1</sup>

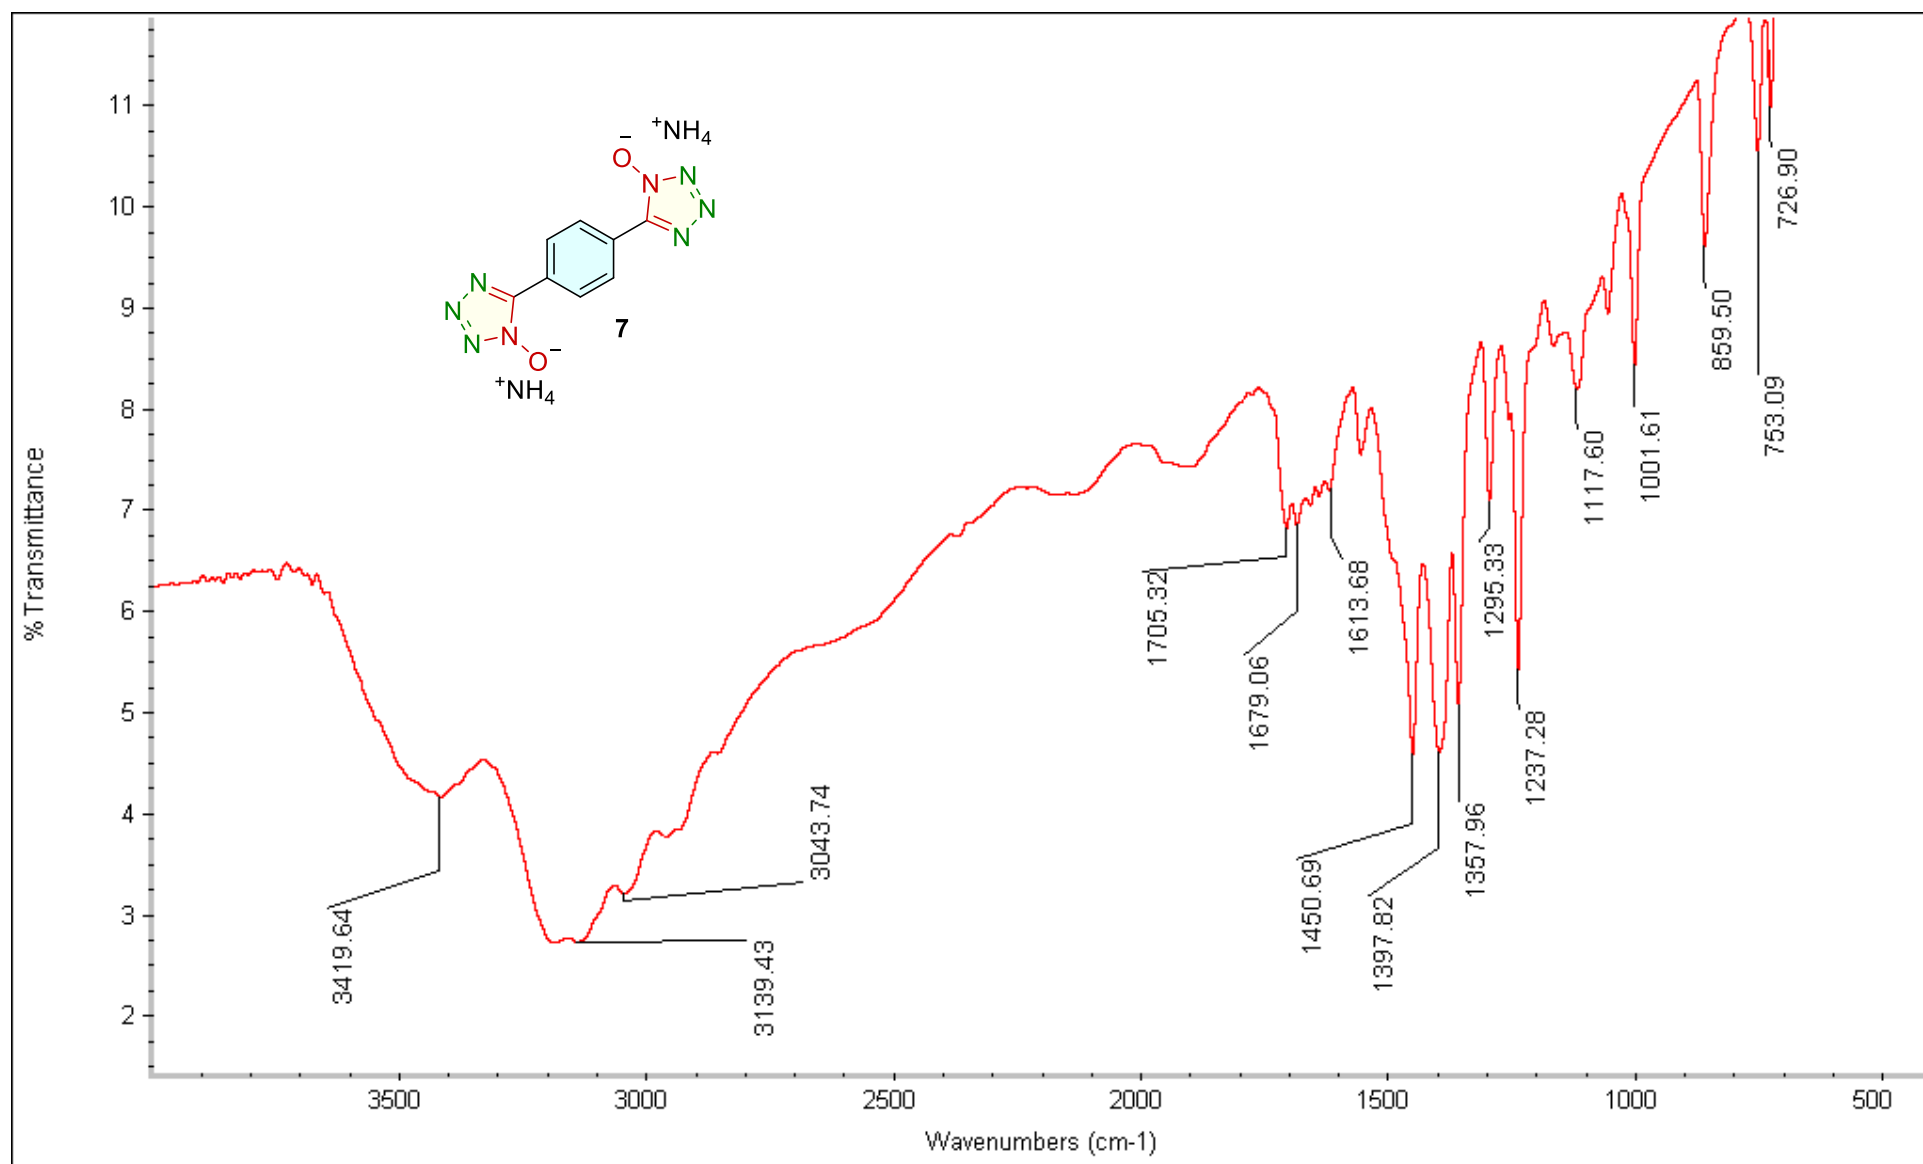

**Figure S28.** FTIR-Spectrum of Compound 7

Current Data Parameters  
NAME 1H  
EXPNO 357  
PROCNO 1

F2 - Acquisition Parameters  
Date\_ 20220820  
Time\_ 11.57  
INSTRUM spect  
PROBHD 5 mm QNP 1H/13  
PULPROG zg  
TD 32768  
SOLVENT DMSO  
NS 13  
DS 0  
SWH 7485.030 Hz  
FIDRES 0.228425 Hz  
AQ 2.1889024 sec  
RG 203.2  
DW 66.800 usec  
DE 6.00 usec  
TE 300.0 K  
D1 1.00000000 sec

==== CHANNEL f1 =====  
NUC1 1H  
P1 3.00 usec  
PL1 -4.00 dB  
SFO1 300.1330013 MHz

F2 - Processing parameters  
SI 32768  
SF 300.1300037 MHz  
WDW EM  
SSB 0  
LB 0.10 Hz  
GB 0  
PC 1.00

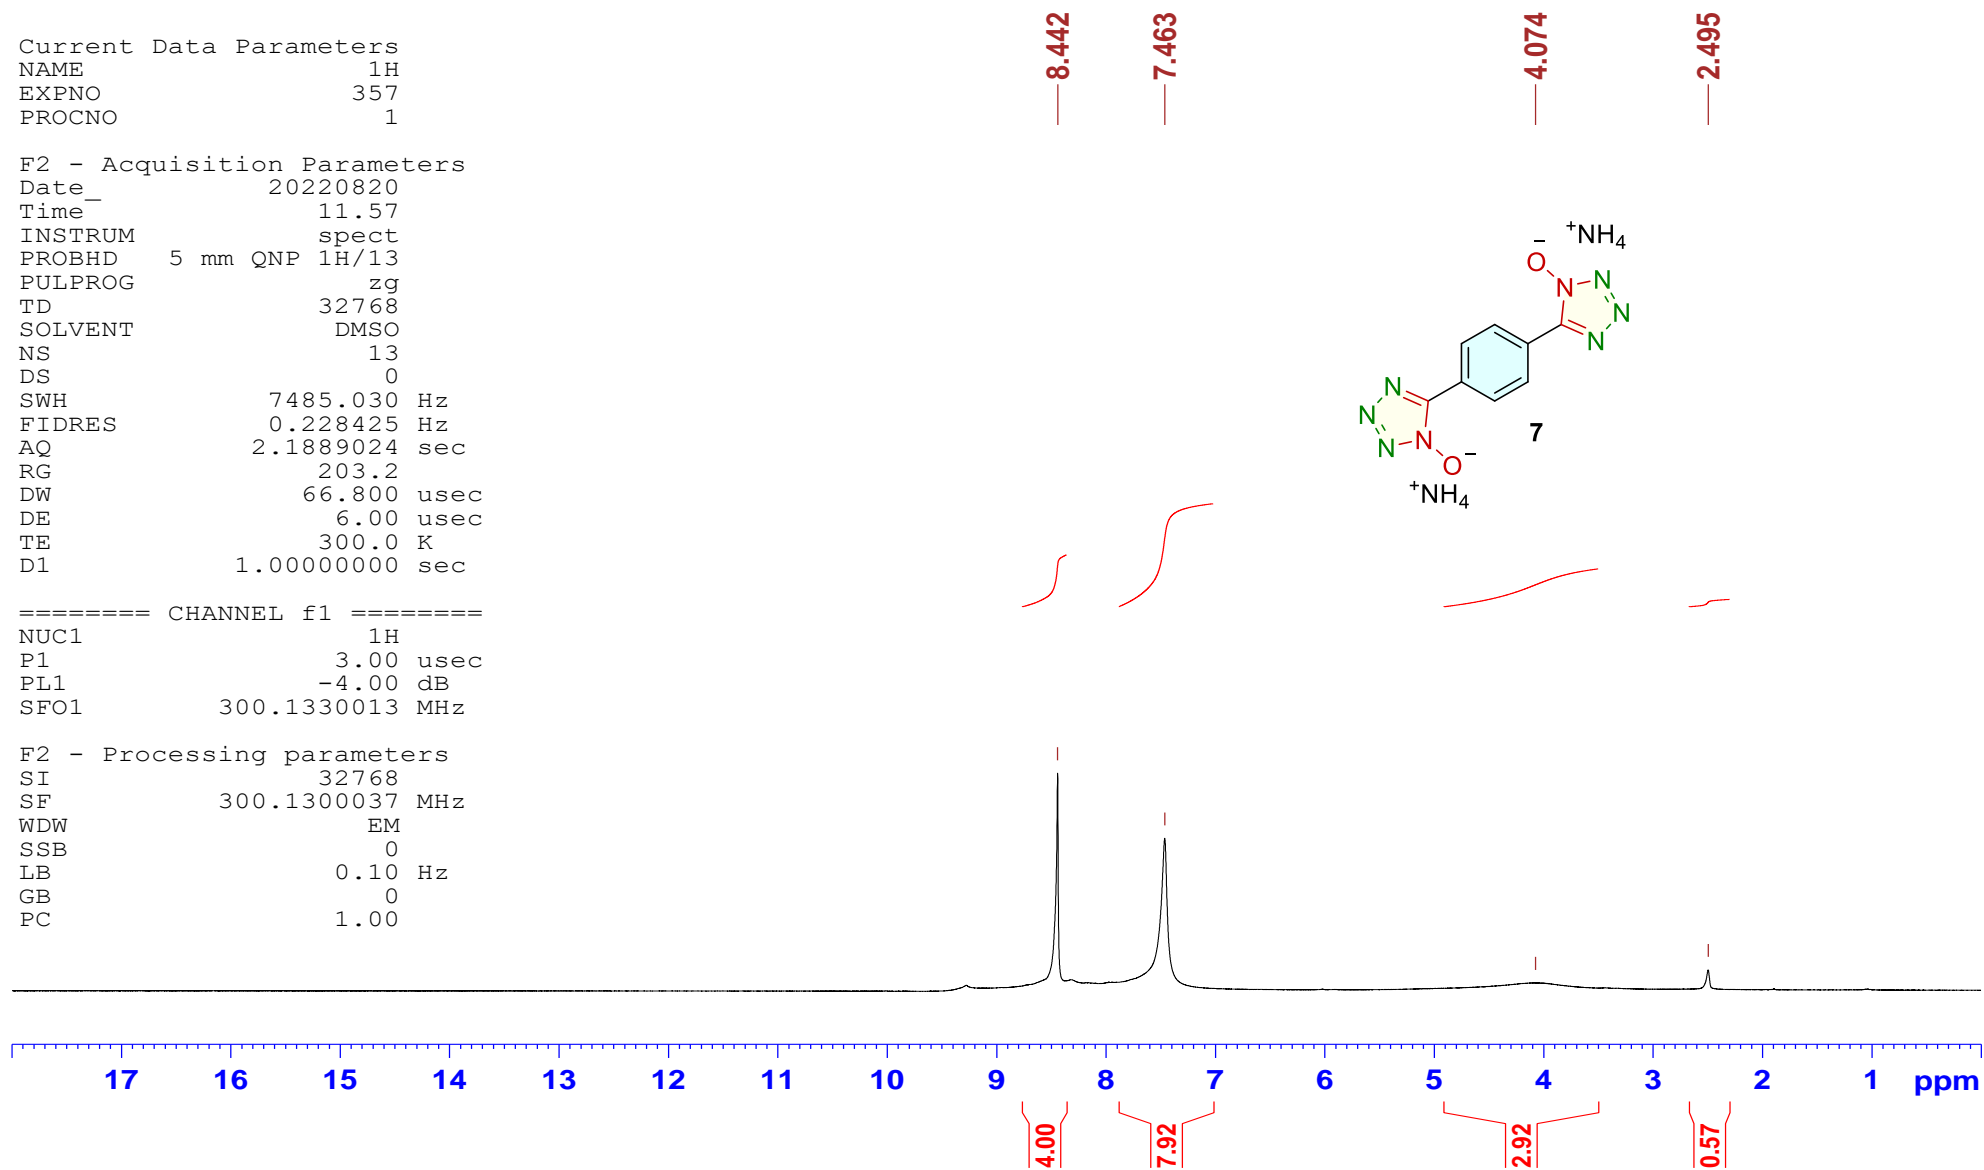

Figure S29. <sup>1</sup>H NMR Spectrum of Compound 7

Current Data Parameters  
NAME 13C  
EXPNO 356  
PROCNO 1

F2 - Acquisition Parameters  
Date\_ 20220820  
Time\_ 11.59  
INSTRUM spect  
PROBHD 5 mm QNP 1H/13  
PULPROG zgpg  
TD 32768  
SOLVENT DMSO  
NS 119  
DS 0  
SWH 19960.080 Hz  
FIDRES 0.609133 Hz  
AQ 0.8208384 sec  
RG 20642.5  
DW 25.050 usec  
DE 6.00 usec  
TE 300.0 K  
D1 1.00000000 sec  
d11 0.03000000 sec  
d12 0.00002000 sec

==== CHANNEL f1 =====  
NUC1 13C  
P1 4.00 usec  
PL1 -5.00 dB  
SFO1 75.4760505 MHz

==== CHANNEL f2 =====  
CPDPRG[2] waltz16  
NUC2 1H  
PCPD2 100.00 usec  
PL2 120.00 dB  
PL12 17.00 dB  
PL13 17.00 dB  
SFO2 300.1312005 MHz

F2 - Processing parameters  
SI 32768  
SF 75.4677791 MHz  
WDW EM  
SSB 0  
LB 1.00 Hz  
GB 0  
PC 1.40

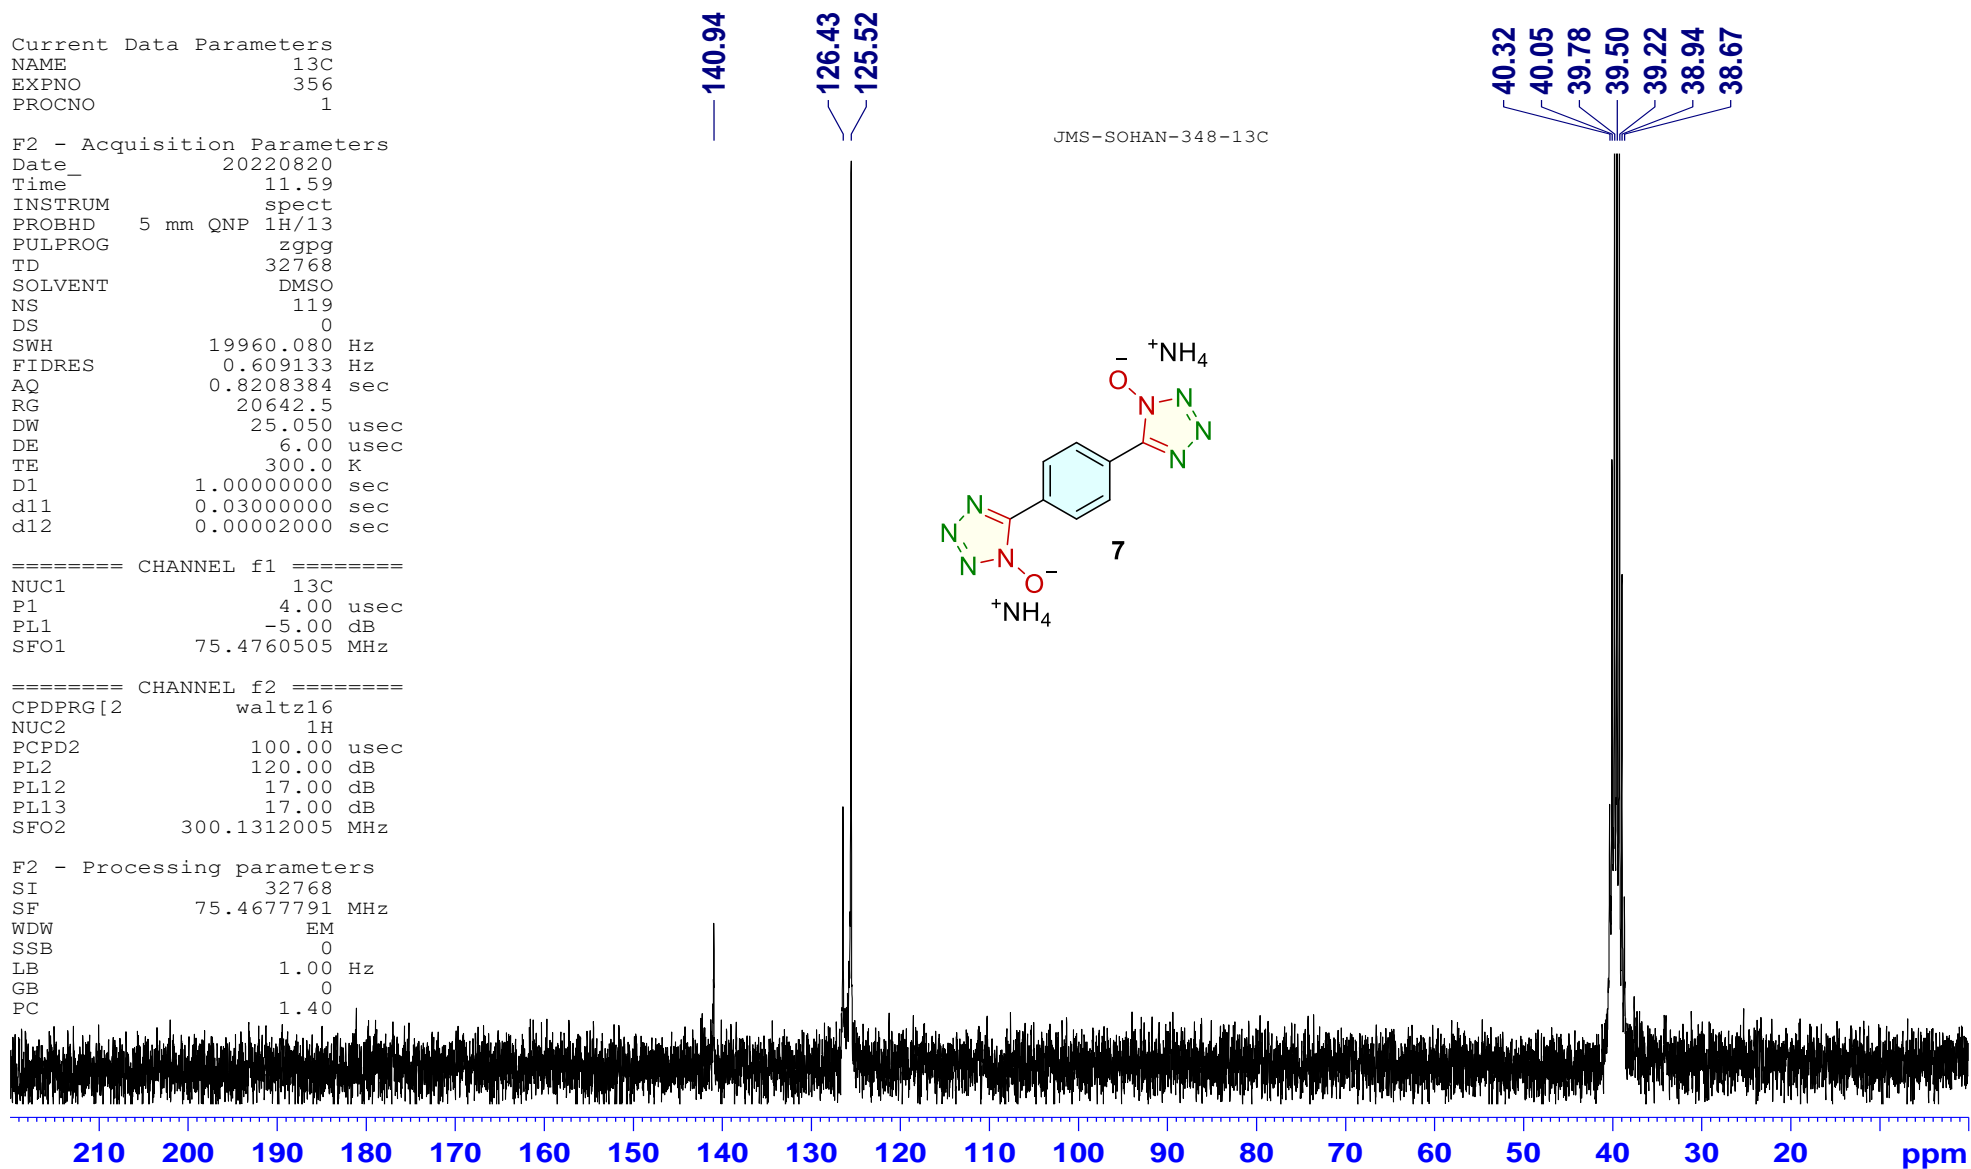

Figure S30. <sup>13</sup>C NMR Spectrum of Compound 7



Sample: SOHAN-348 at 5°C  
Size: 0.1000 mg  
Method: Ramp  
Comment: Cell constant calibration

DSC

File: C:\DSC\SOHAN\SOHAN-348 at 5°C.001  
Operator: SOHAN  
Run Date: 22-Aug-2022 12:31  
Instrument: DSC Q2000 V24.11 Build 124

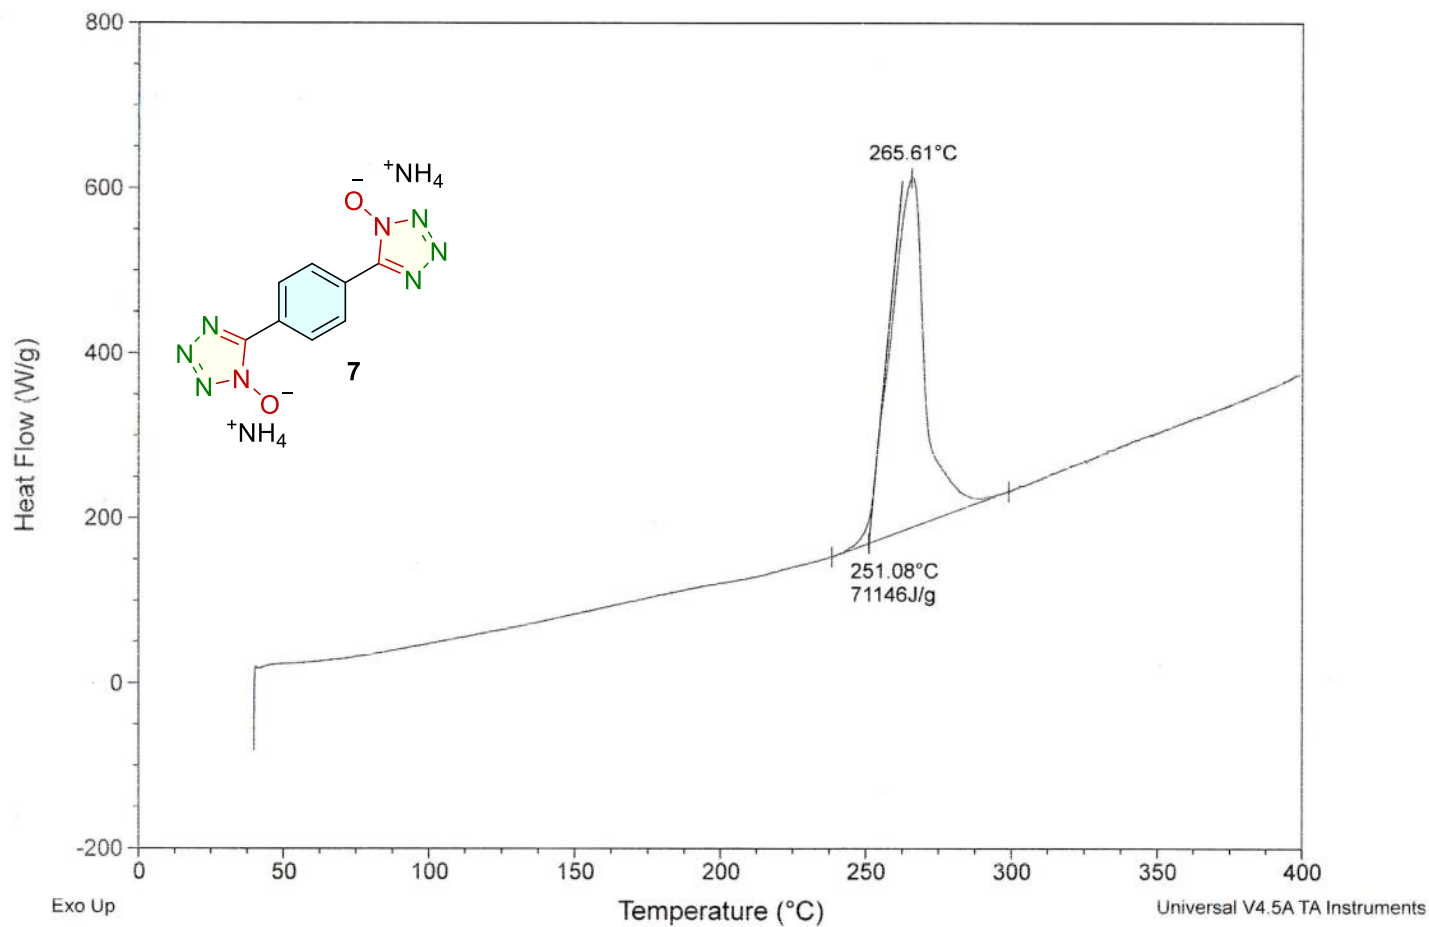

Figure S31. DSC of compound 7 at 5 °C min<sup>-1</sup>

Sample: SOHAN-348 at 5°C  
Size: 1.9460 mg  
Method: Ramp

TGA

File: C:\...TGA\Sohan\SOHAN-348 at 5°C.001  
Operator: SOHAN  
Run Date: 22-Aug-2022 14:50  
Instrument: TGA Q50 V20.13 Build 39

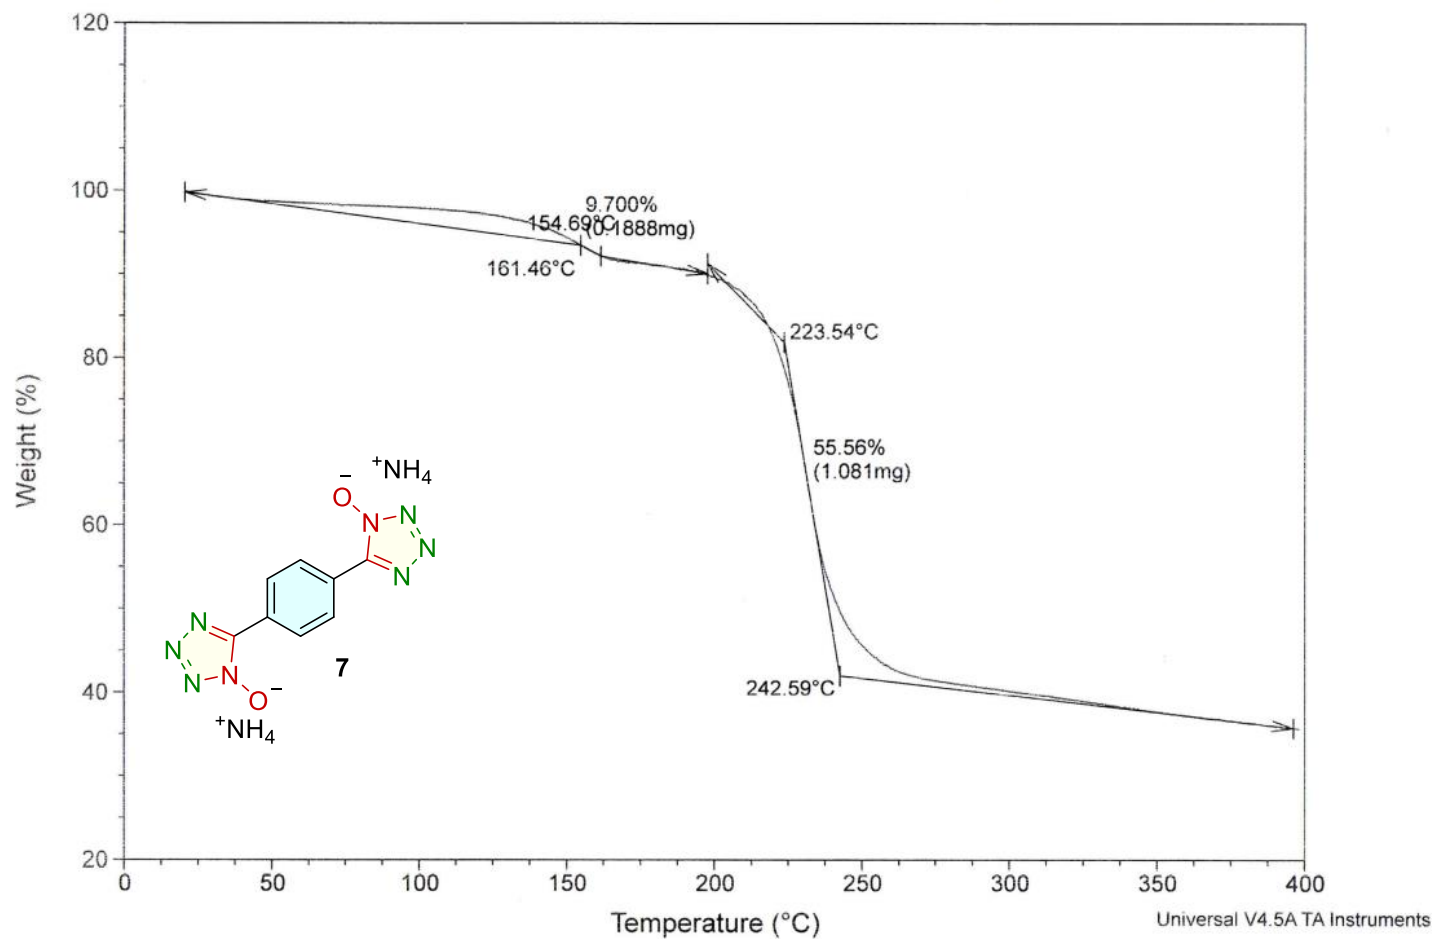

Figure S32. TGA of compound 7 at 5 °C min<sup>-1</sup>

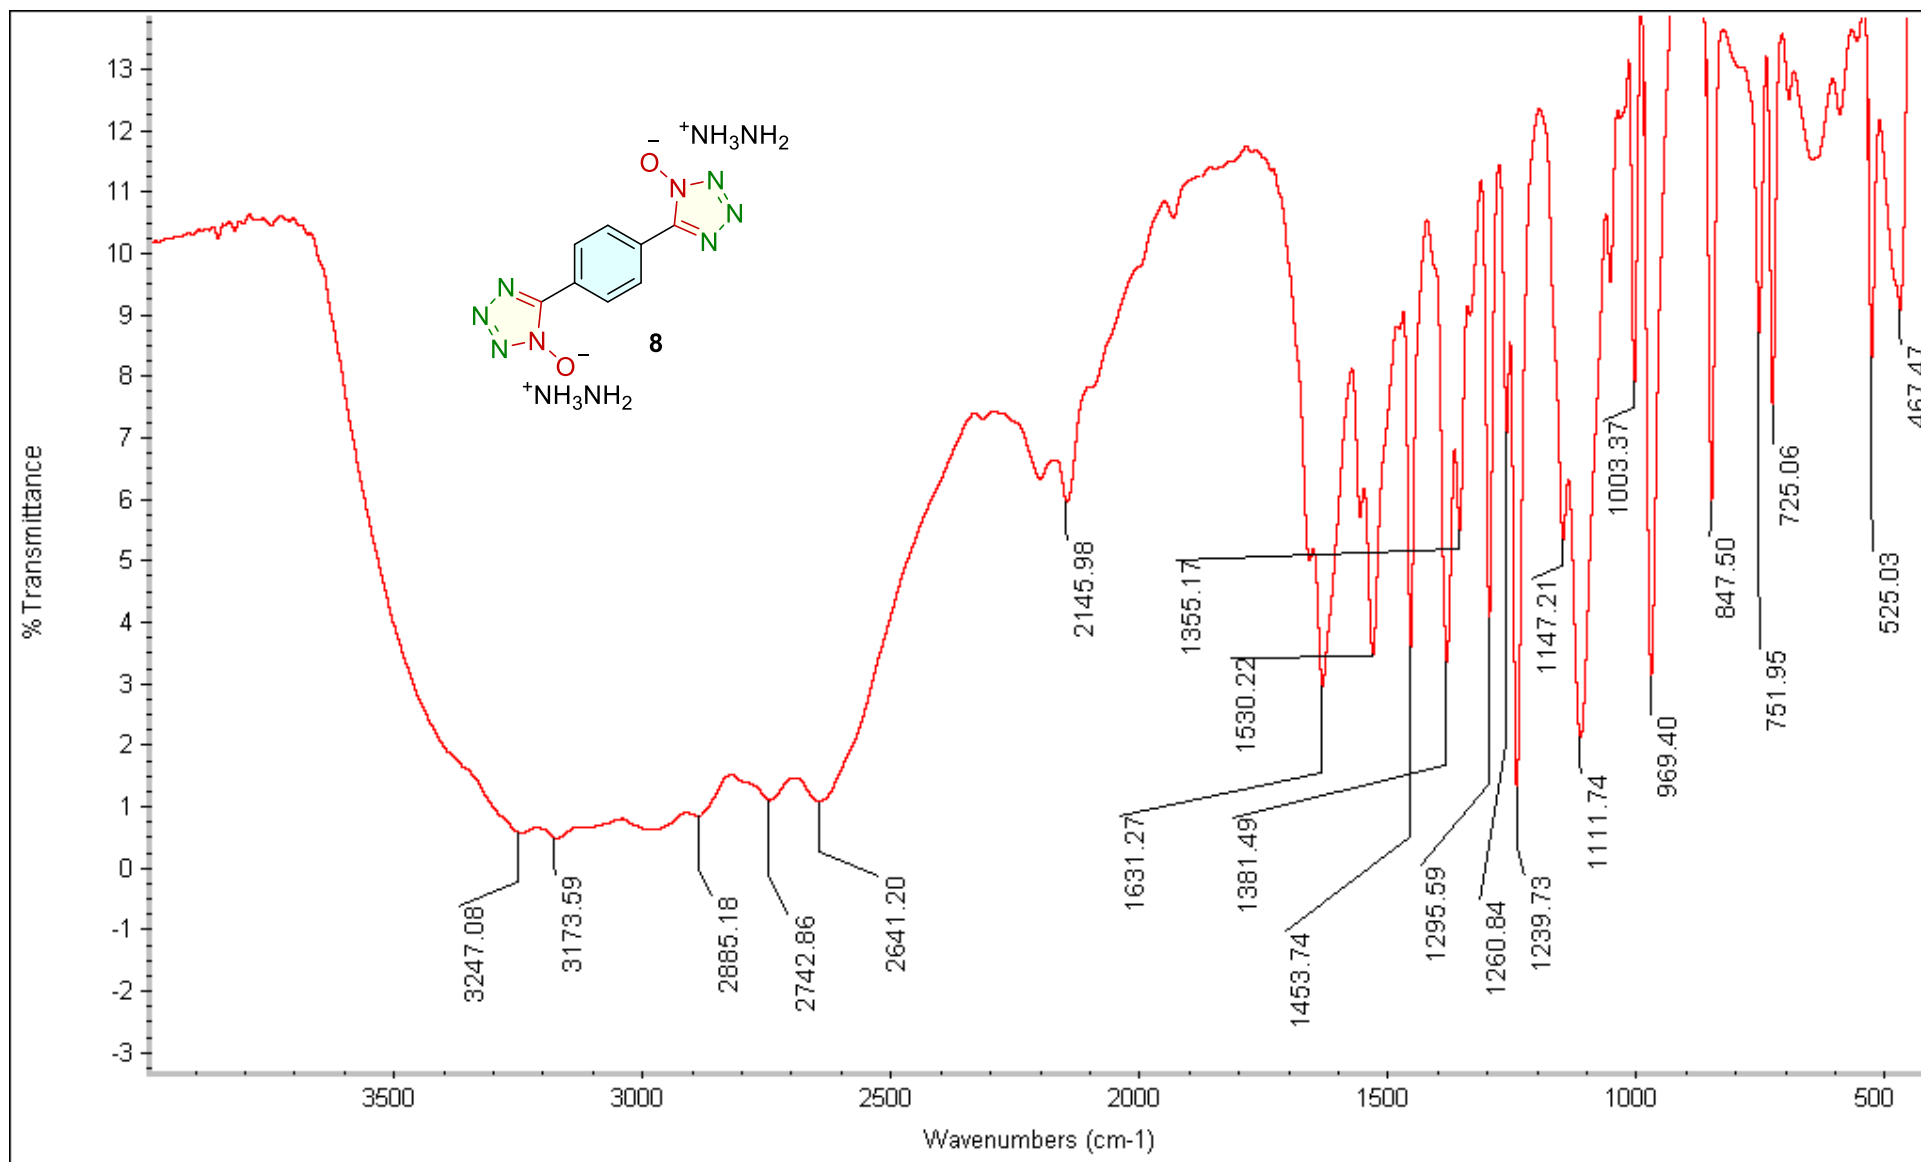

Figure S33. FTIR-Spectrum of Compound 8

Current Data Parameters  
NAME 1H  
EXPNO 360  
PROCNO 1

F2 - Acquisition Parameters  
Date\_ 20220826  
Time\_ 18.55  
INSTRUM spect  
PROBHD 5 mm QNP 1H/13  
PULPROG zg  
TD 32768  
SOLVENT DMSO  
NS 16  
DS 0  
SWH 7485.030 Hz  
FIDRES 0.228425 Hz  
AQ 2.1889024 sec  
RG 32  
DW 66.800 usec  
DE 6.00 usec  
TE 300.0 K  
D1 1.00000000 sec

==== CHANNEL f1 =====  
NUC1 1H  
P1 3.00 usec  
PL1 -4.00 dB  
SFO1 300.1330013 MHz

F2 - Processing parameters  
SI 32768  
SF 300.1300033 MHz  
WDW EM  
SSB 0  
LB 0.10 Hz  
GB 0  
PC 1.00

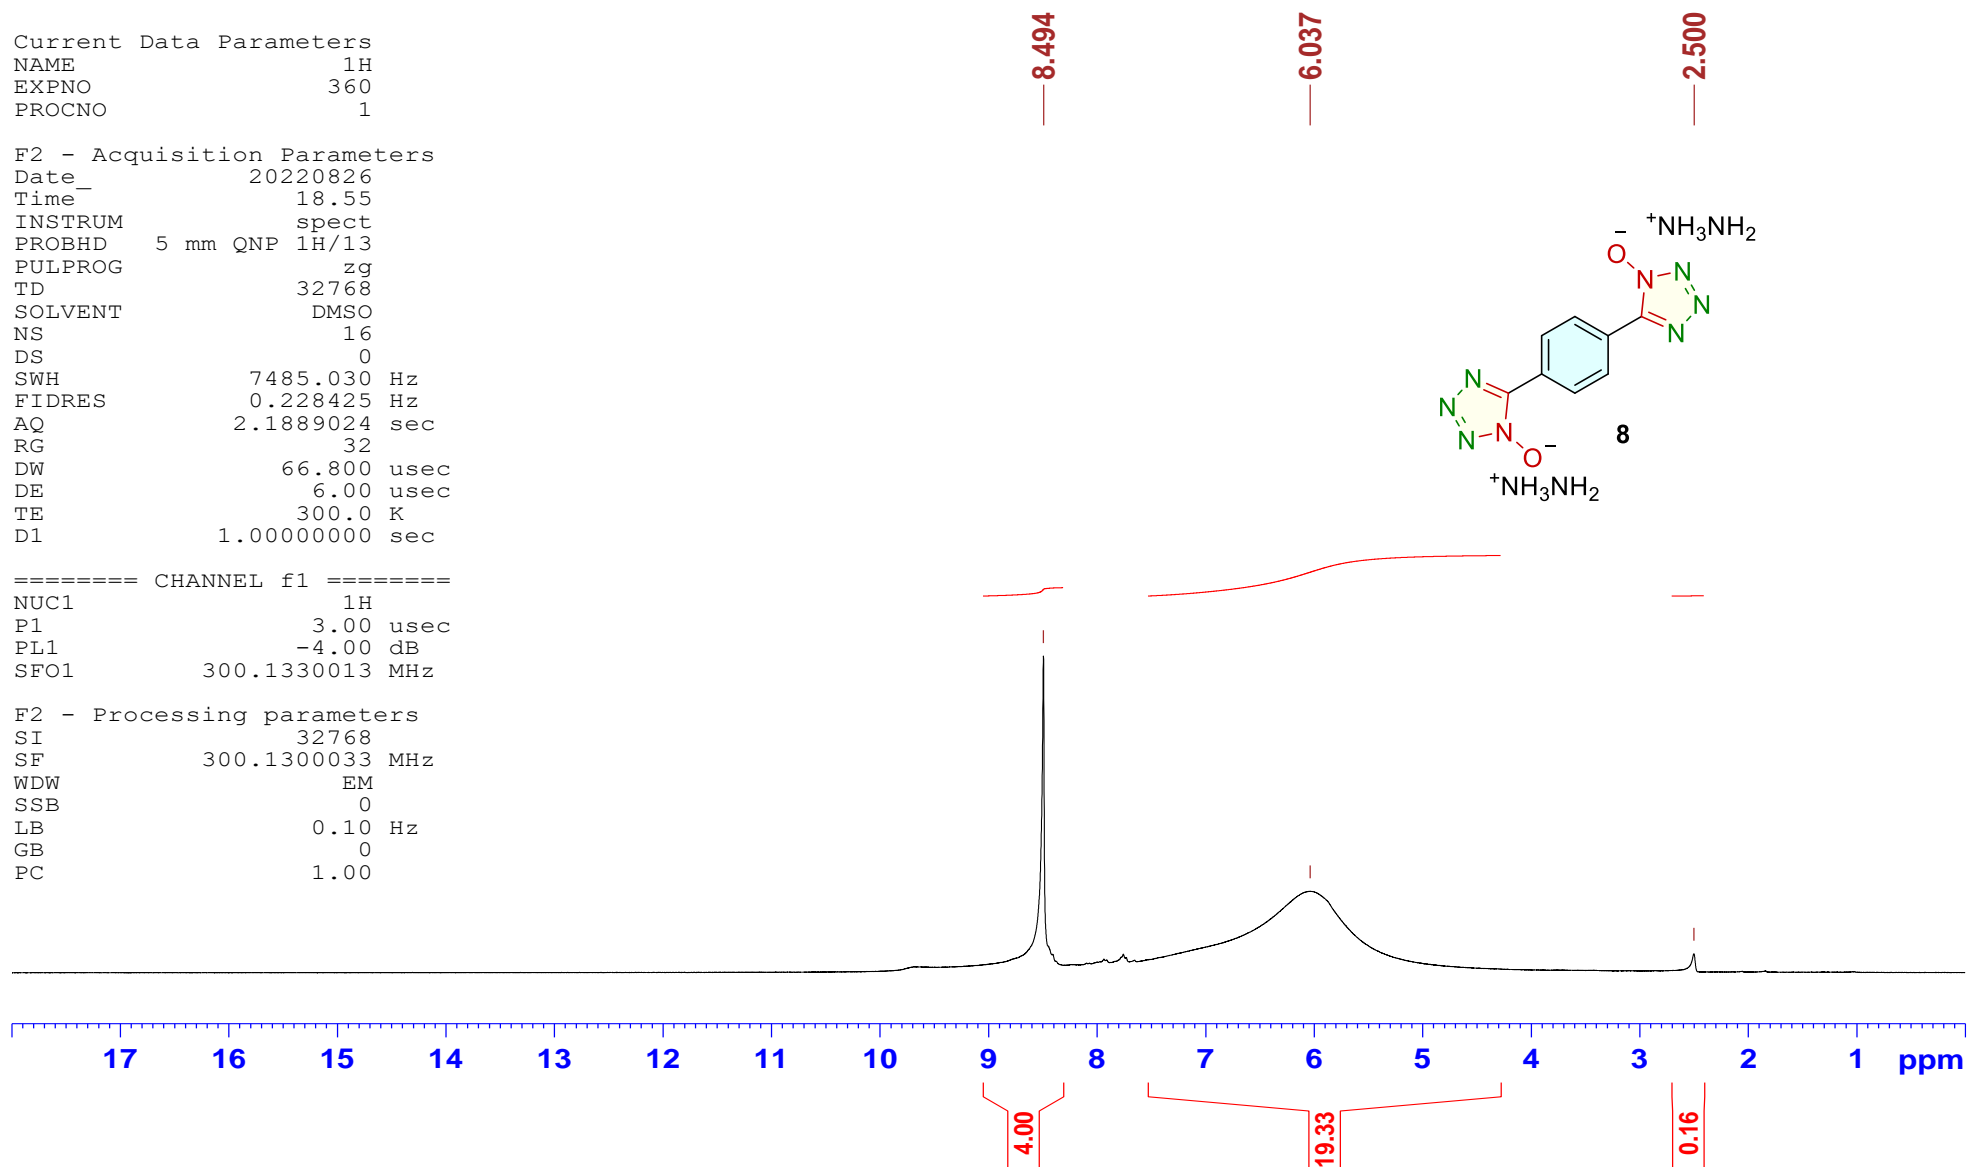

Figure S34. <sup>1</sup>H NMR Spectrum of Compound 8

Current Data Parameters  
NAME 13C  
EXPNO 360  
PROCNO 1

F2 - Acquisition Parameters  
Date\_ 20220826  
Time\_ 18.58  
INSTRUM spect  
PROBHD 5 mm QNP 1H/13  
PULPROG zgpg  
TD 32768  
SOLVENT DMSO  
NS 277  
DS 0  
SWH 19960.080 Hz  
FIDRES 0.609133 Hz  
AQ 0.8208384 sec  
RG 20642.5  
DW 25.050 usec  
DE 6.00 usec  
TE 300.0 K  
D1 1.00000000 sec  
d11 0.03000000 sec  
d12 0.00002000 sec

==== CHANNEL f1 =====  
NUC1 13C  
P1 4.00 usec  
PL1 -5.00 dB  
SFO1 75.4760505 MHz

==== CHANNEL f2 =====  
CPDPRG[2] waltz16  
NUC2 1H  
PCPD2 100.00 usec  
PL2 120.00 dB  
PL12 17.00 dB  
PL13 17.00 dB  
SFO2 300.1312005 MHz

F2 - Processing parameters  
SI 32768  
SF 75.4677747 MHz  
WDW EM  
SSB 0  
LB 0.50 Hz  
GB 0  
PC 1.40

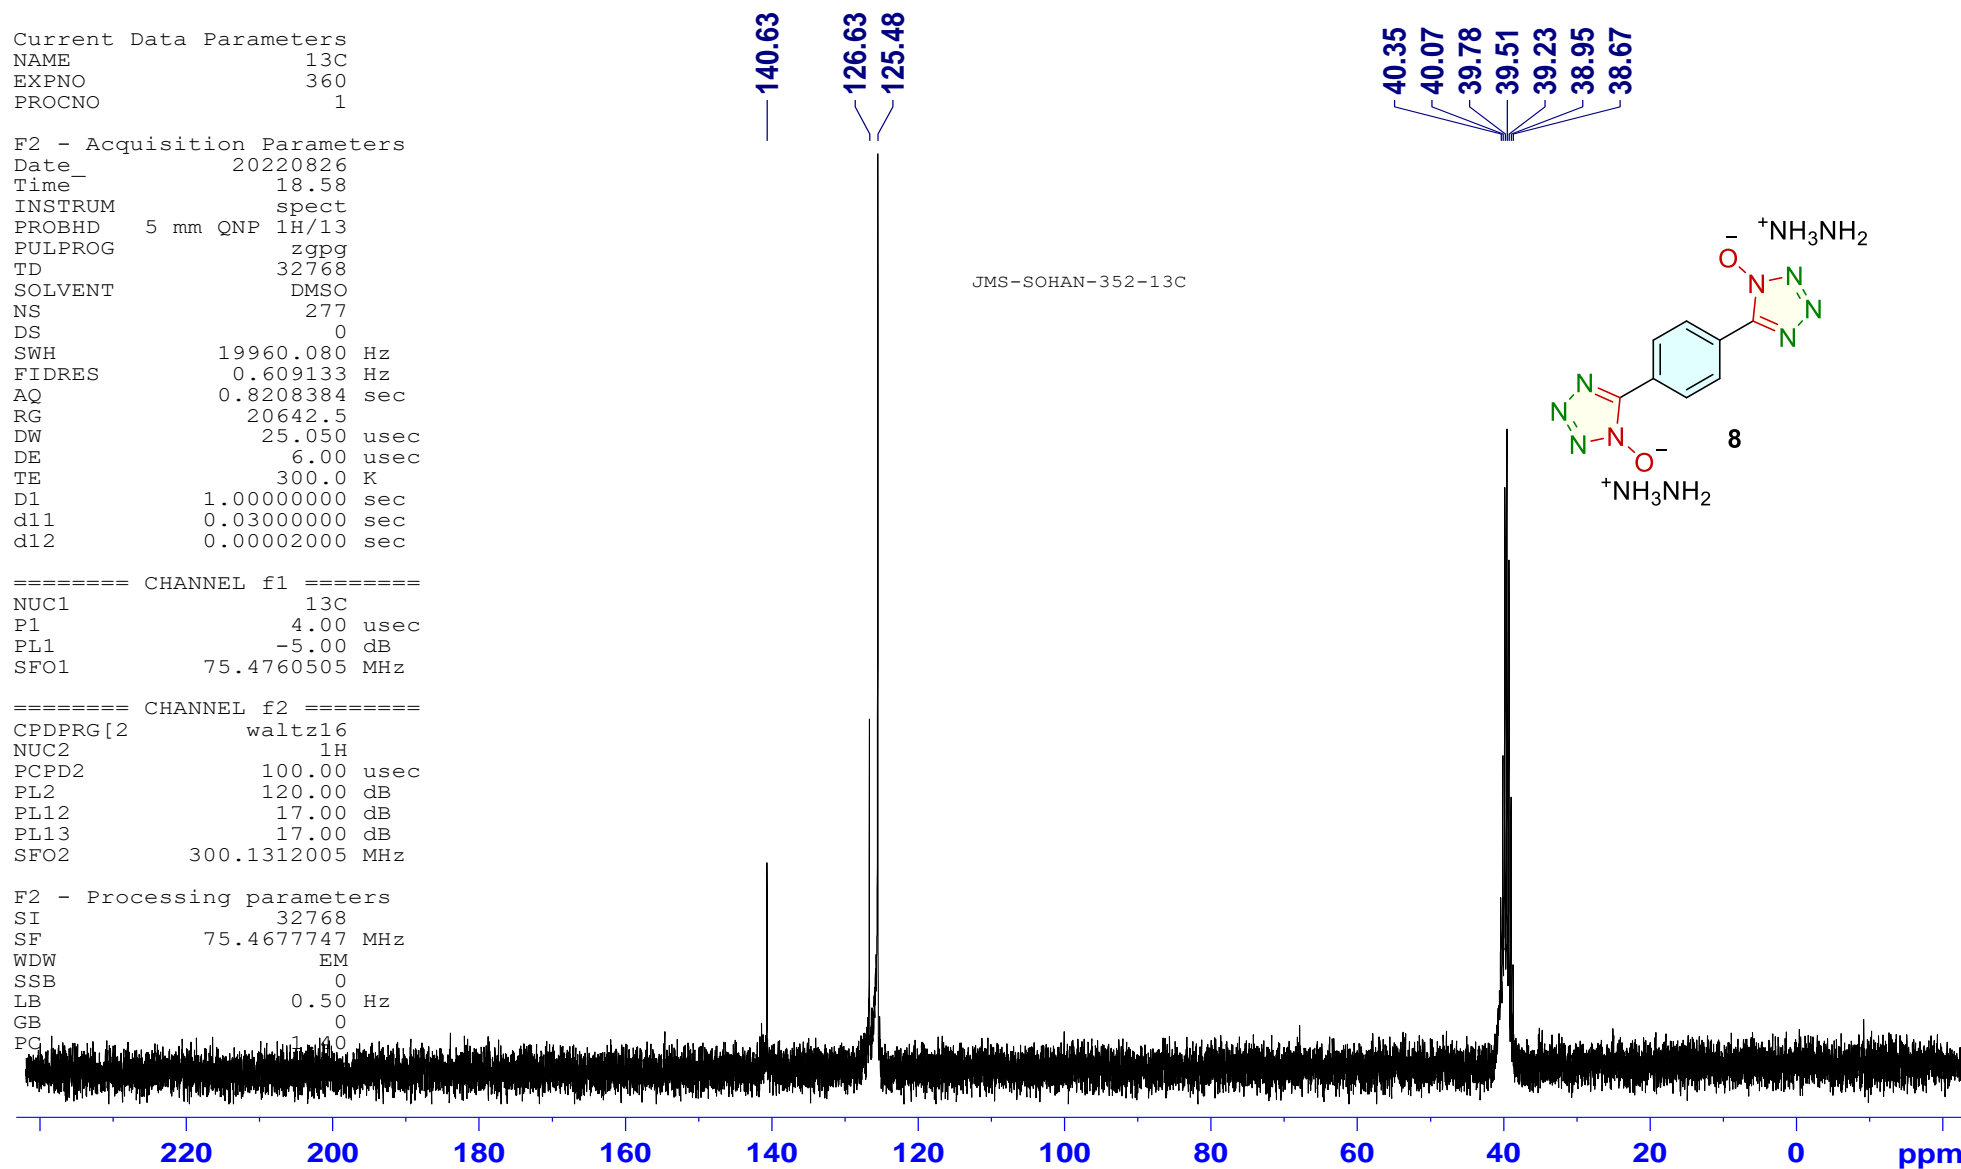

Figure S35. <sup>13</sup>C NMR Spectrum of Compound 8

Current Data Parameters  
NAME DEPT135  
EXPNO 108  
PROCNO 1

F2 - Acquisition Parameters  
Date\_ 20220826  
Time\_ 19.09  
INSTRUM spect  
PROBHD 5 mm QNP 1H/13  
PULPROG dept135  
TD 32768  
SOLVENT DMSO  
NS 27  
DS 16  
SWH 19960.080 Hz  
FIDRES 0.609133 Hz  
AQ 0.8208384 sec  
RG 18390.4  
DW 25.050 usec  
DE 6.00 usec  
TE 300.0 K  
CNST2 140.0000000  
D1 2.000000000 sec  
d2 0.00357143 sec  
d12 0.00002000 sec  
DELTA 0.00000891 sec

==== CHANNEL f1 =====  
NUC1 13C  
P1 7.00 usec  
p2 14.00 usec  
PL1 -5.00 dB  
SFO1 75.4760505 MHz

==== CHANNEL f2 =====  
CPDPRG[2] waltz16  
NUC2 1H  
P3 6.10 usec  
p4 12.20 usec  
PL2 -6.00 dB  
PL12 18.54 dB  
SFO2 300.1312005 MHz

F2 - Processing parameters  
SI 32768  
SF 75.4677747 MHz  
WDW EM  
SSB 0  
LB 1.00 Hz  
GB 0  
PC 1.40

—125.48

JMS-SOHAN-352-DEPT135

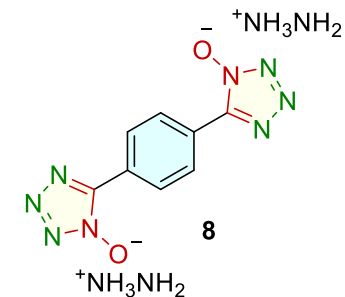

210 200 190 180 170 160 150 140 130 120 110 100 90 80 70 60 50 40 30 20 10 ppm

Figure S36.  $^{13}\text{C}$ -DEPT135 NMR Spectrum of Compound 8

15N{1H}\_5865 Sohan 352

Current Data Parameters  
NAME New folder  
EXPNO 5865  
PROCNO 1

F2 - Acquisition Parameters  
Date\_ 20220922  
Time\_ 10.16  
INSTRUM spect  
PROBHD 5 mm PABBO BB/  
PULPROG zgig  
TD 16248  
SOLVENT DMSO  
NS 635  
DS 0  
SWH 34722.223 Hz  
FIDRES 2.137015 Hz  
AQ 0.2339712 sec  
RG 27.83  
DW 14.400 usec  
DE 8.00 usec  
TE 303.2 K  
D1 10.0000000 sec  
D11 0.0300000 sec  
TD0 10240

==== CHANNEL f1 =====  
SFO1 50.6963210 MHz  
NUC1 15N  
P1 12.00 usec  
PLW1 155.0000000 W

==== CHANNEL f2 =====  
SFO2 500.1920008 MHz  
NUC2 1H  
CPDPRG[2] waltz16  
PCPD2 80.00 usec  
PLW2 26.0000000 W  
PLW12 0.27649999 W

F2 - Processing parameters  
SI 32768  
SF 50.7031345 MHz  
WDW EM  
SSB 0  
LB 5.00 Hz  
GB 0  
PC 0.20

-14.91  
-15.50  
-60.41  
-84.56  
-108.29

-14.907  
-15.495

-331.07

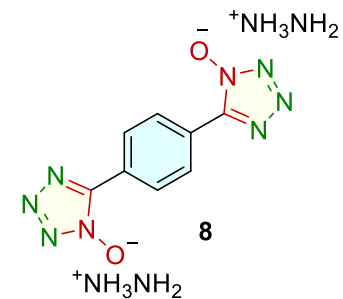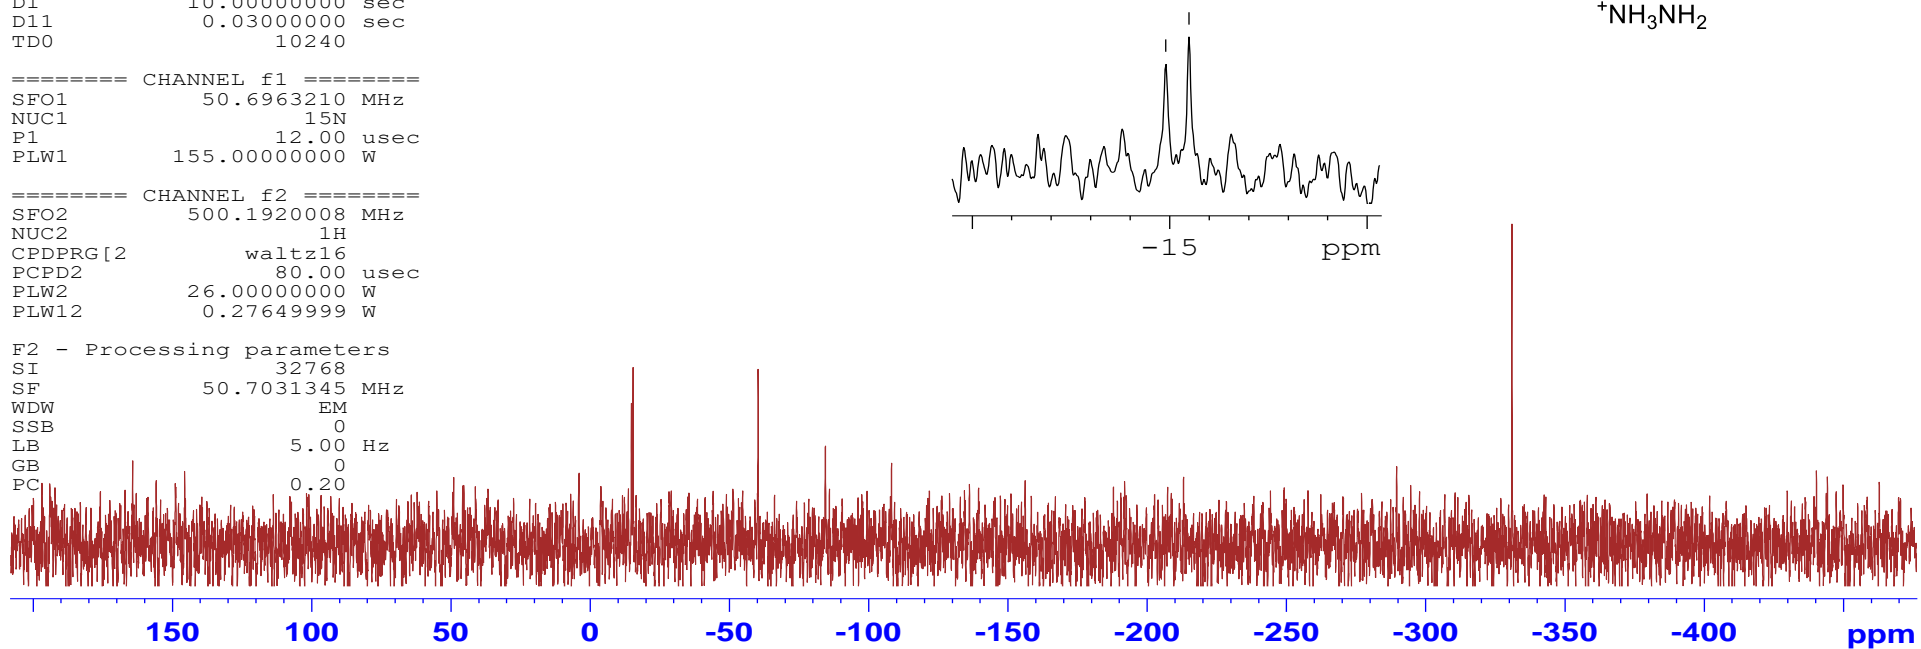

Figure S37.  $^{15}\text{N}$  NMR Spectrum of Compound 8 in DMSO- $d_6$  (at 50.70 MHz)

Sample: SOHAN-352 at 5°C  
Size: 0.1000 mg  
Method: Ramp  
Comment: Cell constant calibration

DSC

File: C:\...DSC\SOHAN\SOHAN-352 at 5°C.001  
Operator: SOHAN  
Run Date: 29-Aug-2022 17:04  
Instrument: DSC Q2000 V24.11 Build 124

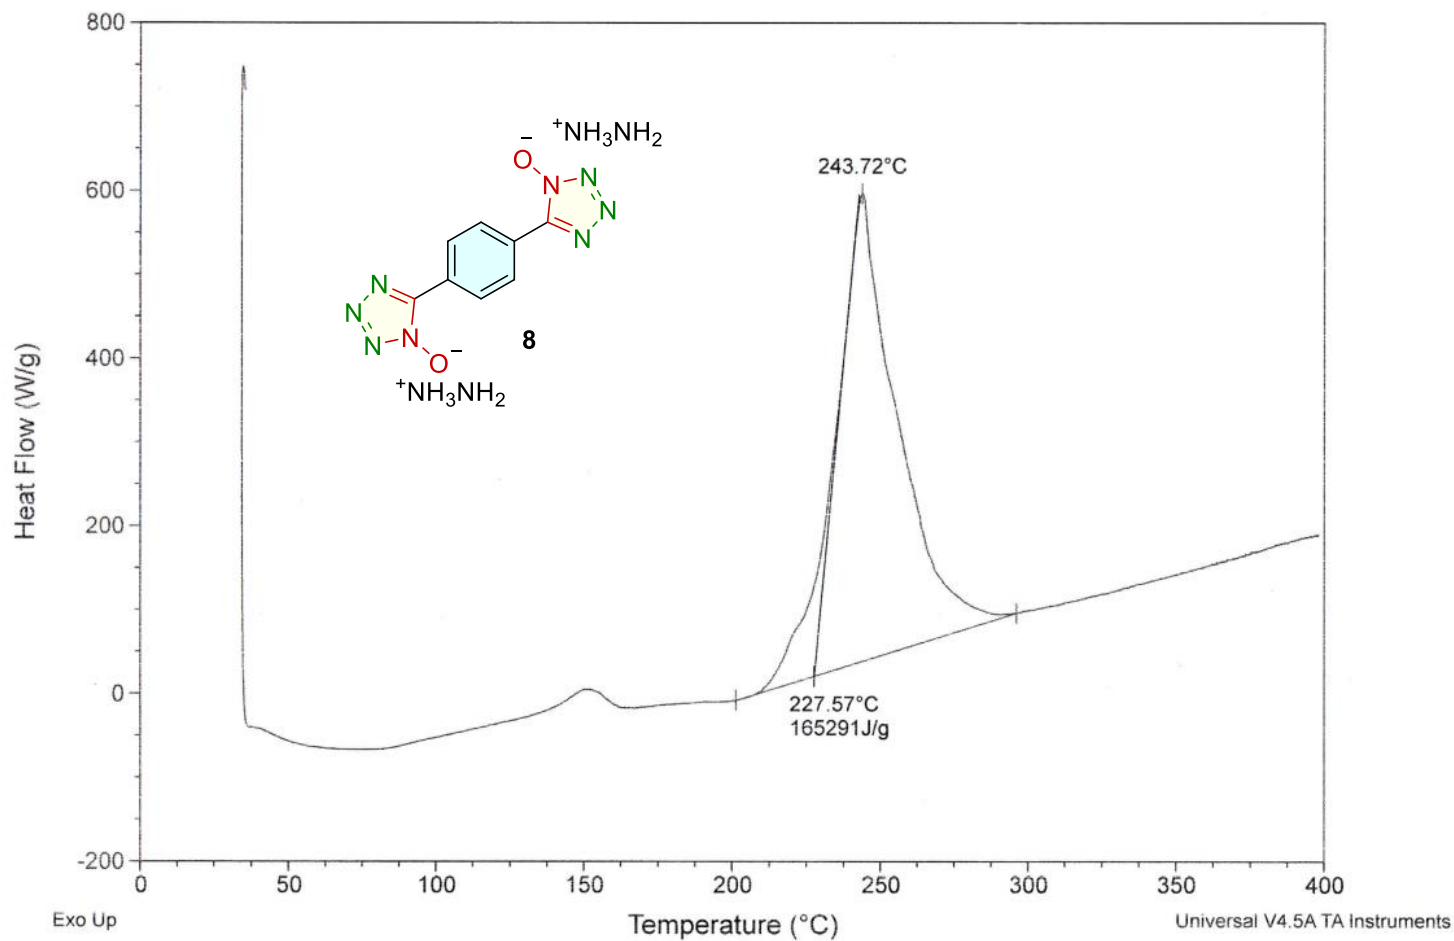

Figure S38. DSC of compound 8 at 5 °C min<sup>-1</sup>



Sample: SOHAN-352 at 5°C  
Size: 2.7310 mg  
Method: Ramp

### TGA

File: C:\...TGA\Sohan\SOHAN-352 at 5°C.001  
Operator: SOHAN  
Run Date: 29-Aug-2022 17:11  
Instrument: TGA Q50 V20.13 Build 39

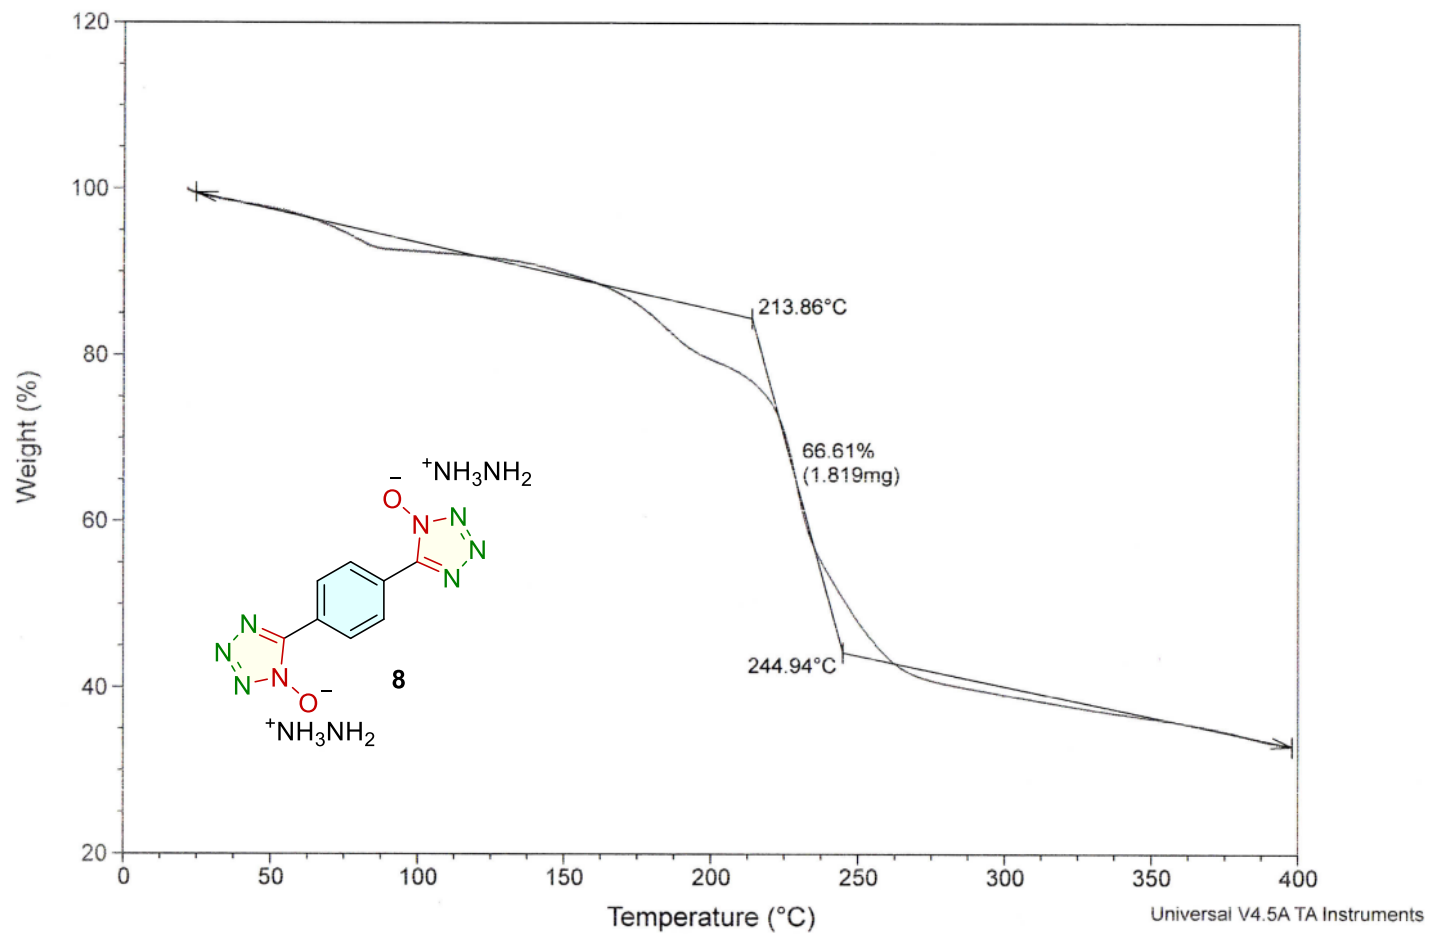

Figure S39. TGA of compound 8 at 5 °C min<sup>-1</sup>

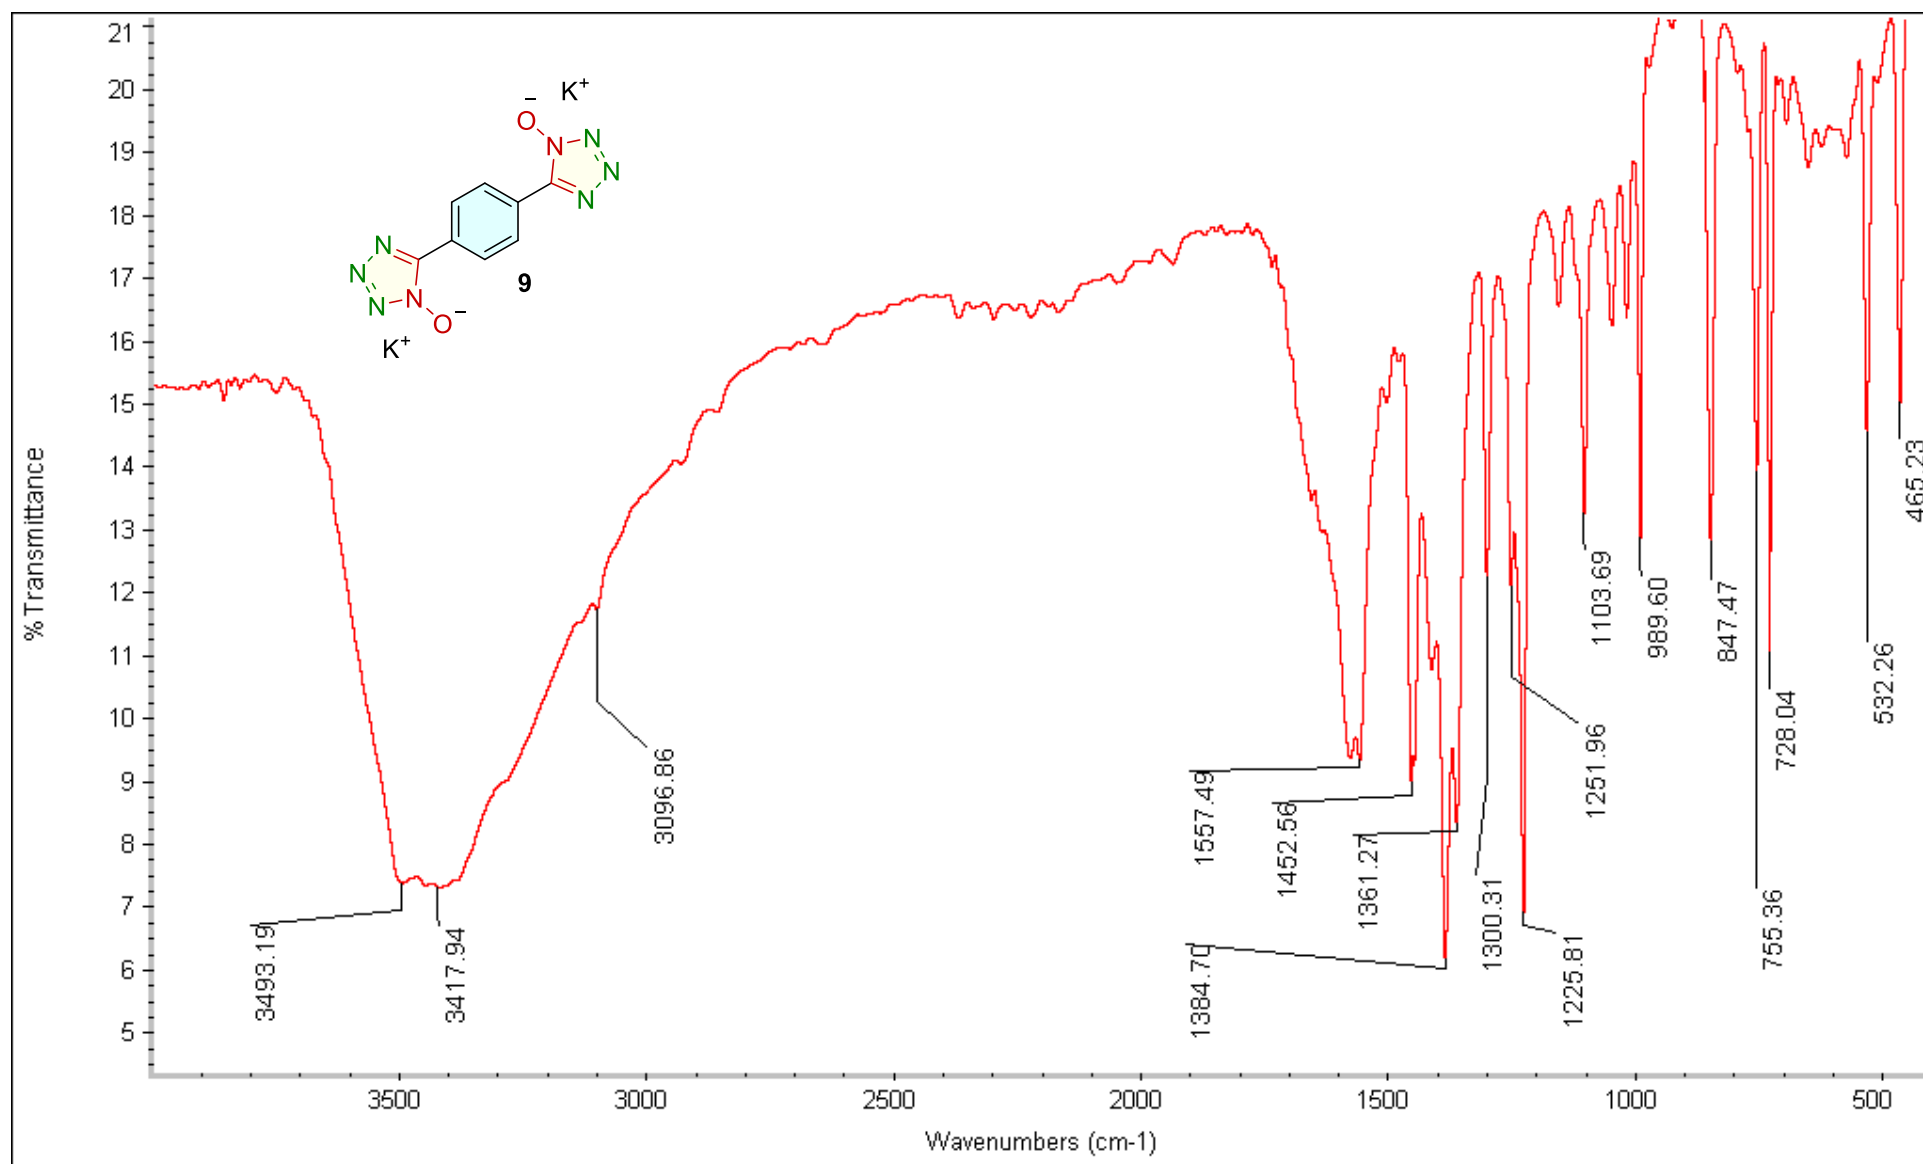

**Figure S40.** FTIR-Spectrum of Compound **9**

Current Data Parameters  
NAME 1H  
EXPNO 361  
PROCNO 1

F2 - Acquisition Parameters  
Date\_ 20220826  
Time\_ 19.12  
INSTRUM spect  
PROBHD 5 mm QNP 1H/13  
PULPROG zg  
TD 32768  
SOLVENT DMSO  
NS 16  
DS 0  
SWH 7485.030 Hz  
FIDRES 0.228425 Hz  
AQ 2.1889024 sec  
RG 32  
DW 66.800 usec  
DE 6.00 usec  
TE 300.0 K  
D1 1.0000000 sec

==== CHANNEL f1 =====  
NUC1 1H  
P1 3.00 usec  
PL1 -4.00 dB  
SFO1 300.1330013 MHz

F2 - Processing parameters  
SI 32768  
SF 300.1300062 MHz  
WDW EM  
SSB 0  
LB 0.10 Hz  
GB 0  
PC 1.00

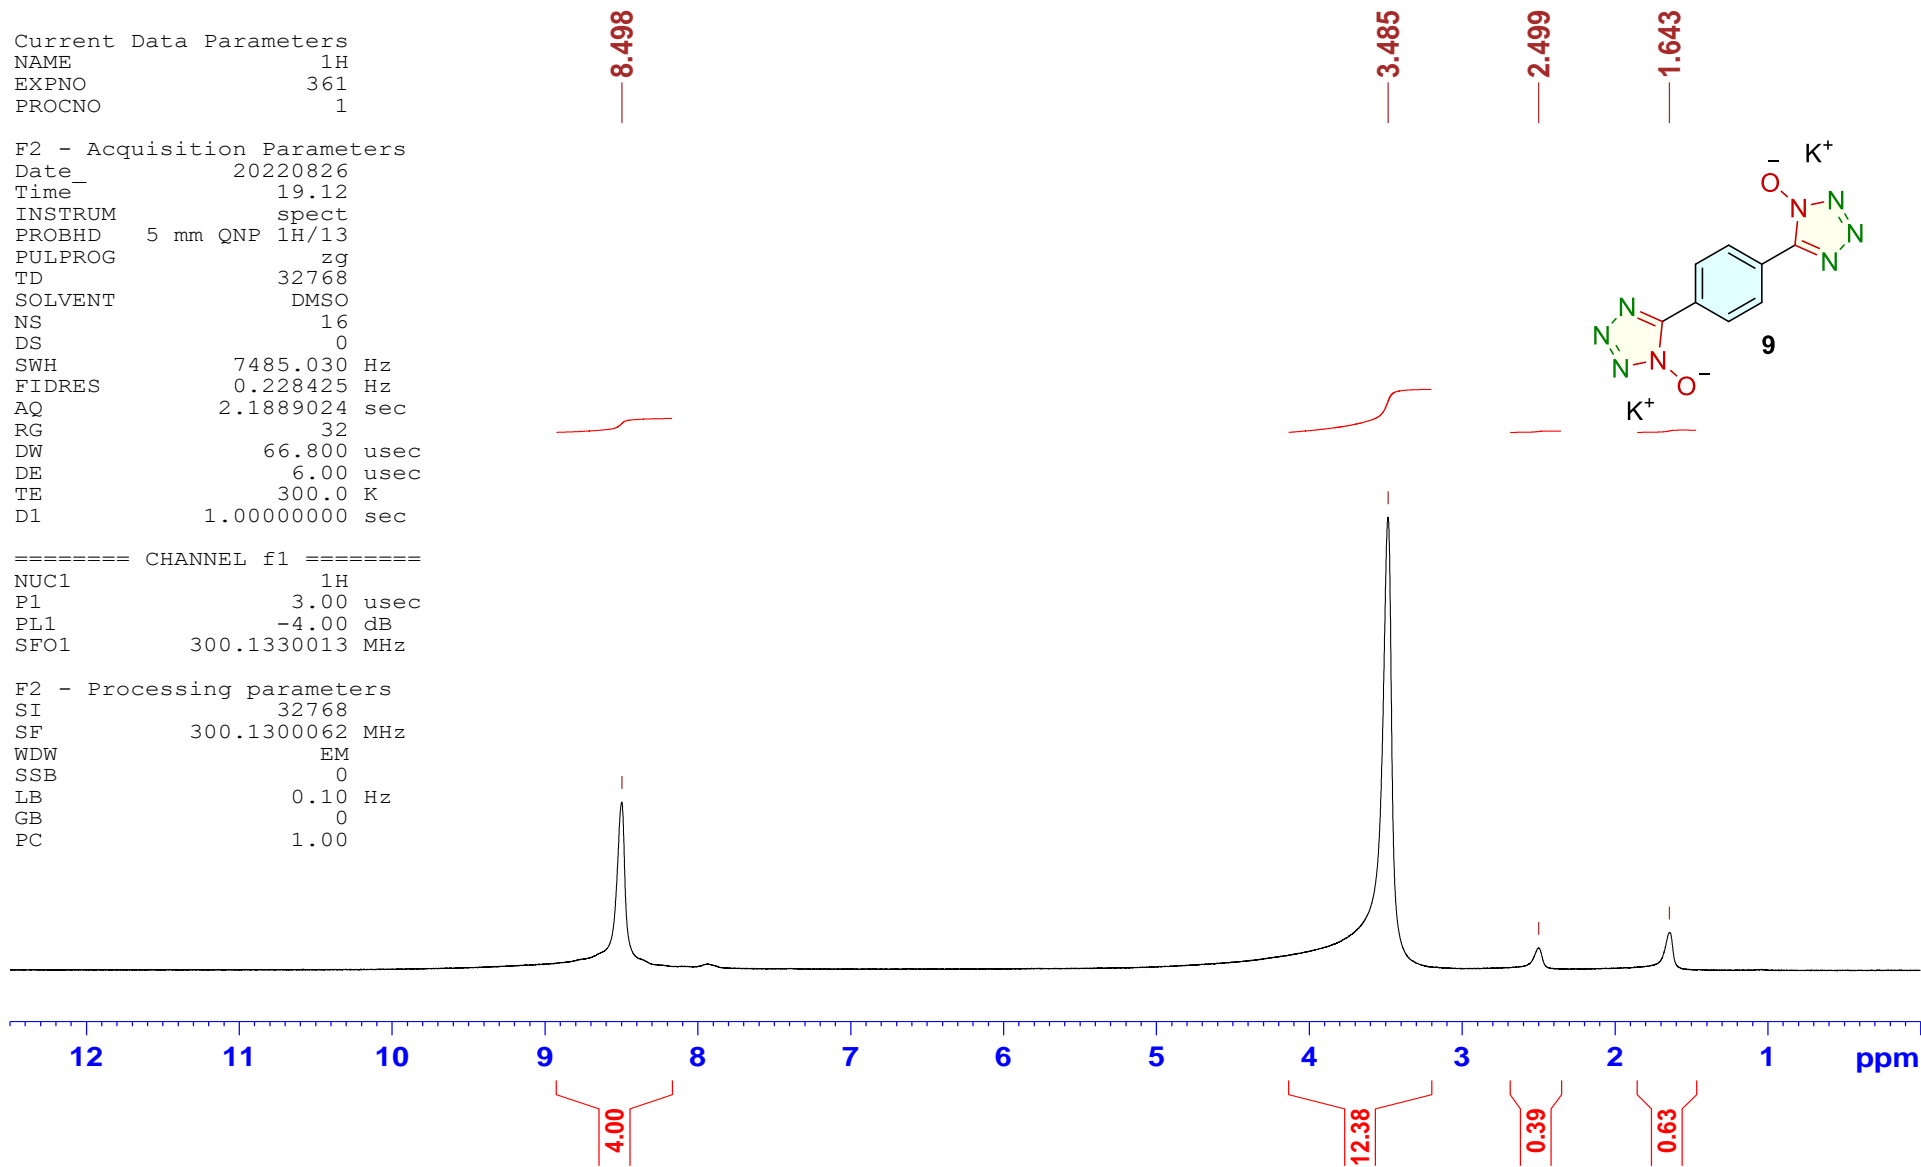

Figure S41. <sup>1</sup>H NMR Spectrum of Compound 9

Current Data Parameters  
NAME 13C  
EXPNO 361  
PROCNO 1

F2 - Acquisition Parameters  
Date\_ 20220826  
Time\_ 19.15  
INSTRUM spect  
PROBHD 5 mm QNP 1H/13  
PULPROG zgpg  
TD 32768  
SOLVENT DMSO  
NS 3413  
DS 0  
SWH 19960.080 Hz  
FIDRES 0.609133 Hz  
AQ 0.8208384 sec  
RG 20642.5  
DW 25.050 usec  
DE 6.00 usec  
TE 300.0 K  
D1 1.0000000 sec  
d11 0.0300000 sec  
d12 0.0000200 sec

==== CHANNEL f1 =====  
NUC1 13C  
P1 4.00 usec  
PL1 -5.00 dB  
SFO1 75.4760505 MHz

==== CHANNEL f2 =====  
CPDPRG[2] waltz16  
NUC2 1H  
PCPD2 100.00 usec  
PL2 120.00 dB  
PL12 17.00 dB  
PL13 17.00 dB  
SFO2 300.1312005 MHz

F2 - Processing parameters  
SI 32768  
SF 75.4677840 MHz  
WDW EM  
SSB 0  
LB 0.50 Hz  
GB 0  
PC 1.40

140.00  
126.73  
124.79

40.34  
40.07  
39.79  
39.51  
39.23  
38.96  
38.68

JMS-SOHAN-353-13C

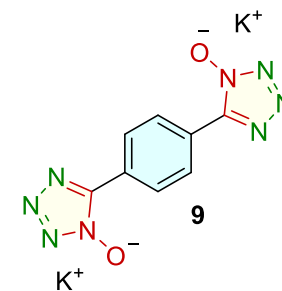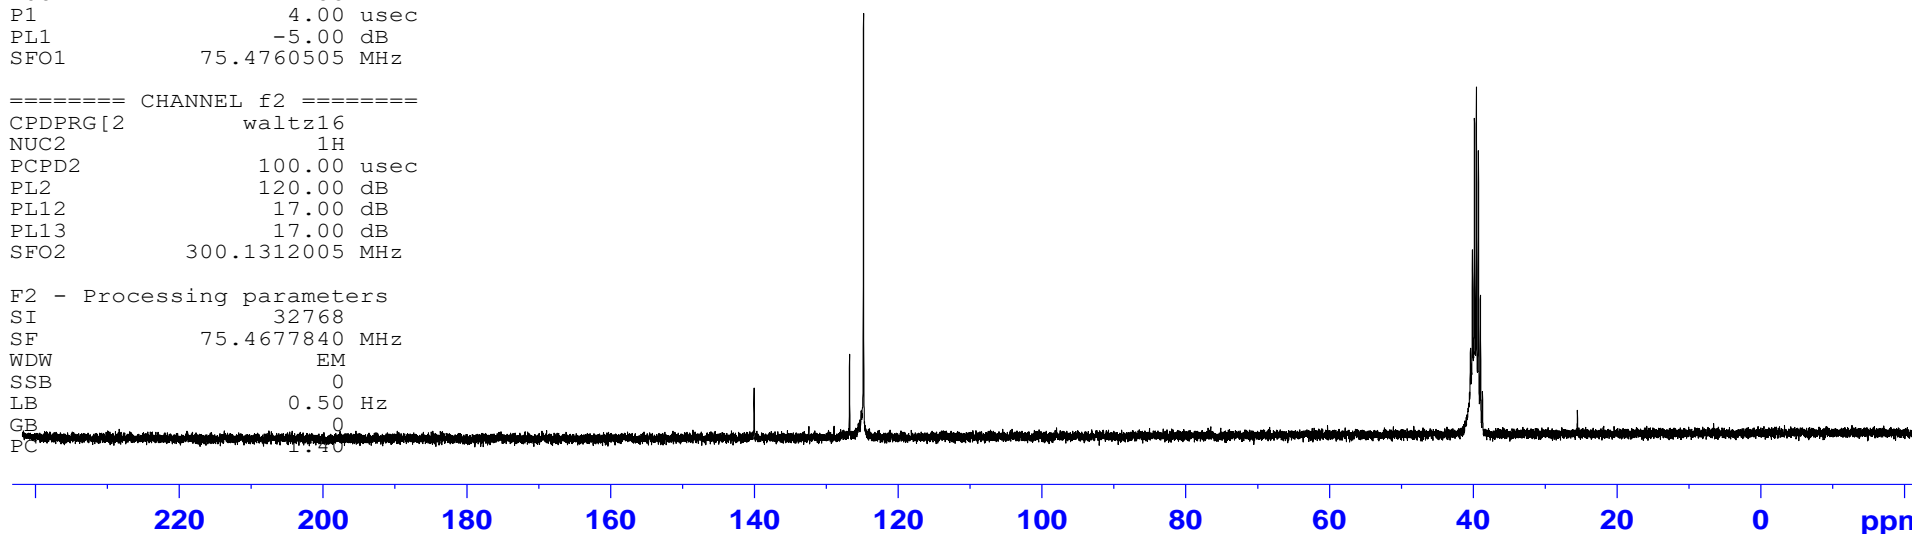

Figure S42. <sup>13</sup>C NMR Spectrum of Compound 9

Sample: SOHAN-353 at 5°C  
Size: 0.1000 mg  
Method: Ramp  
Comment: Cell constant calibration

DSC

File: C:\...DSC\SOHAN\SOHAN-353 at 5°C.001  
Operator: SOHAN  
Run Date: 29-Aug-2022 21:23  
Instrument: DSC Q2000 V24.11 Build 124

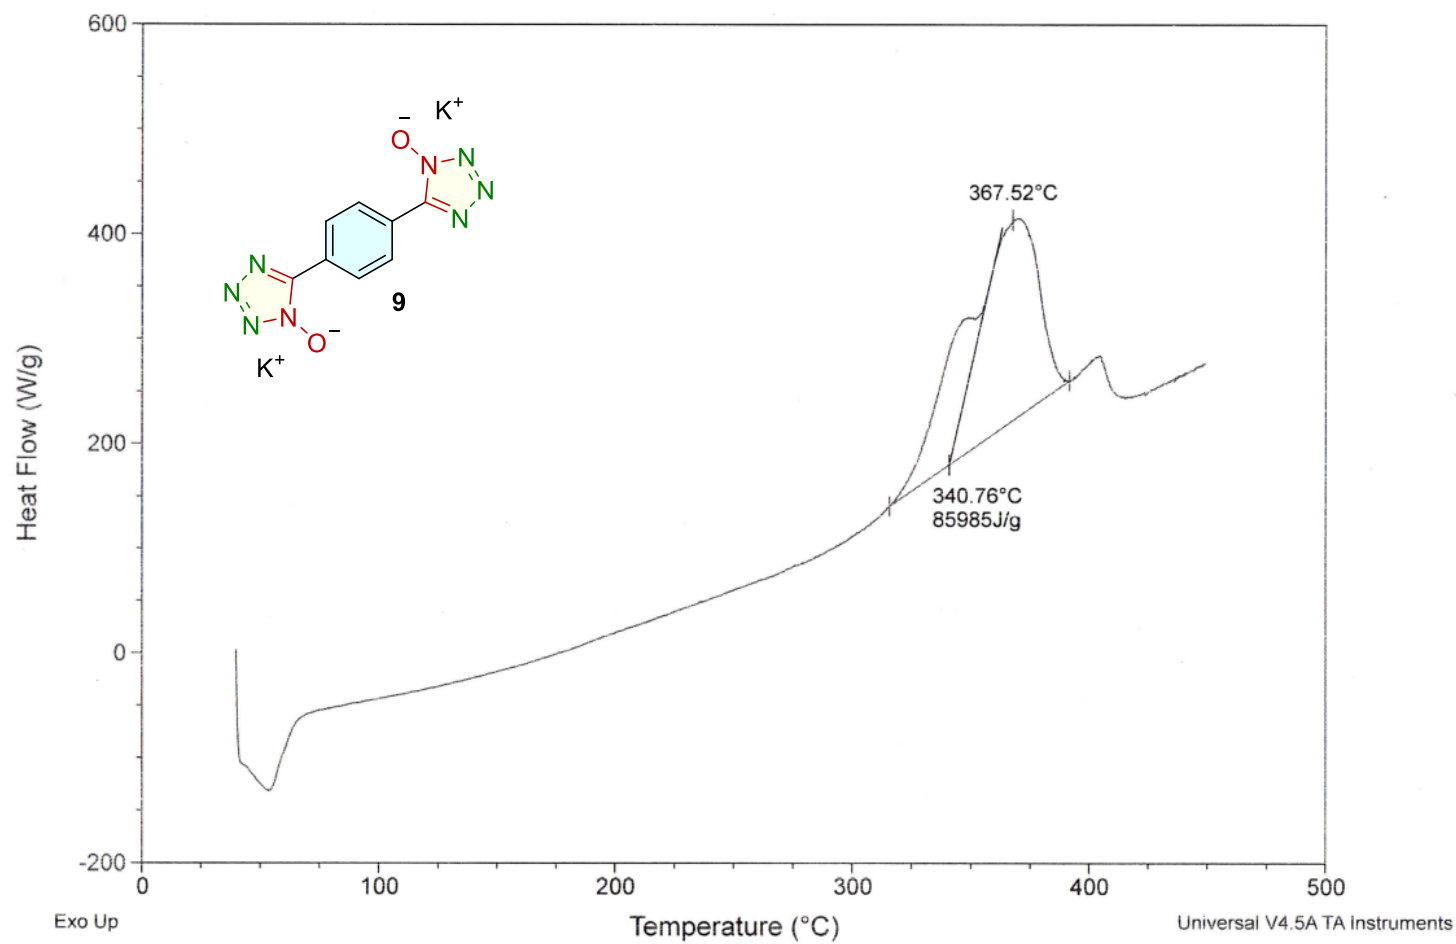

Figure S43. DSC of compound 9 at 5 °C min<sup>-1</sup>

Sample: SOHAN-353 at 5°C  
Size: 2.4230 mg  
Method: Ramp

### TGA

File: C:\...TGA\Sohan\SOHAN-353 at 5°C.001  
Operator: SOHAN  
Run Date: 29-Aug-2022 21:37  
Instrument: TGA Q50 V20.13 Build 39

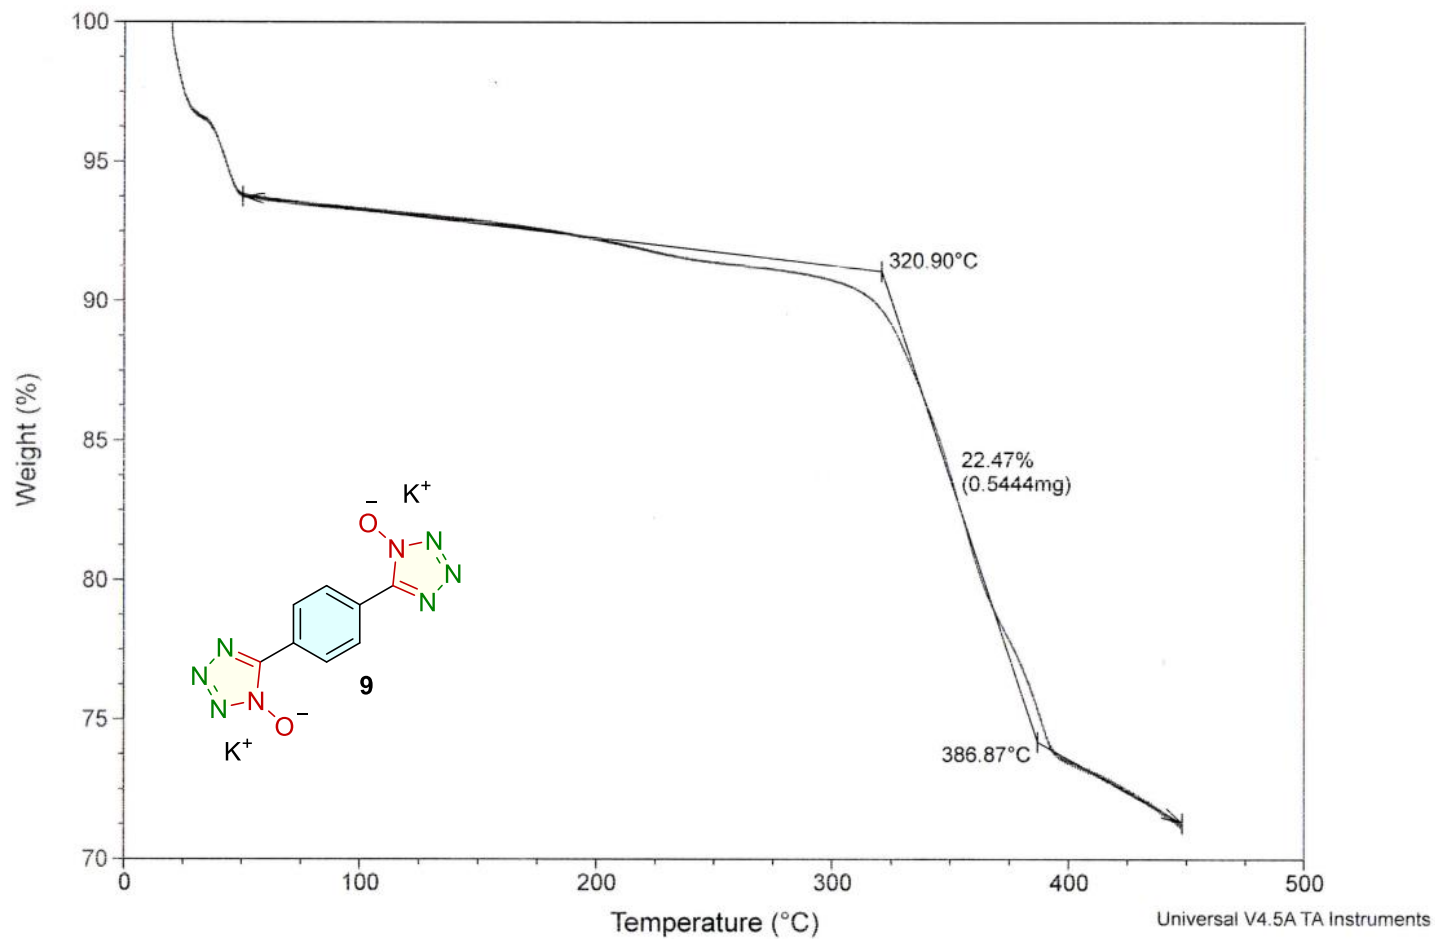

Figure S44. TGA of compound 9 at 5 °C min<sup>-1</sup>

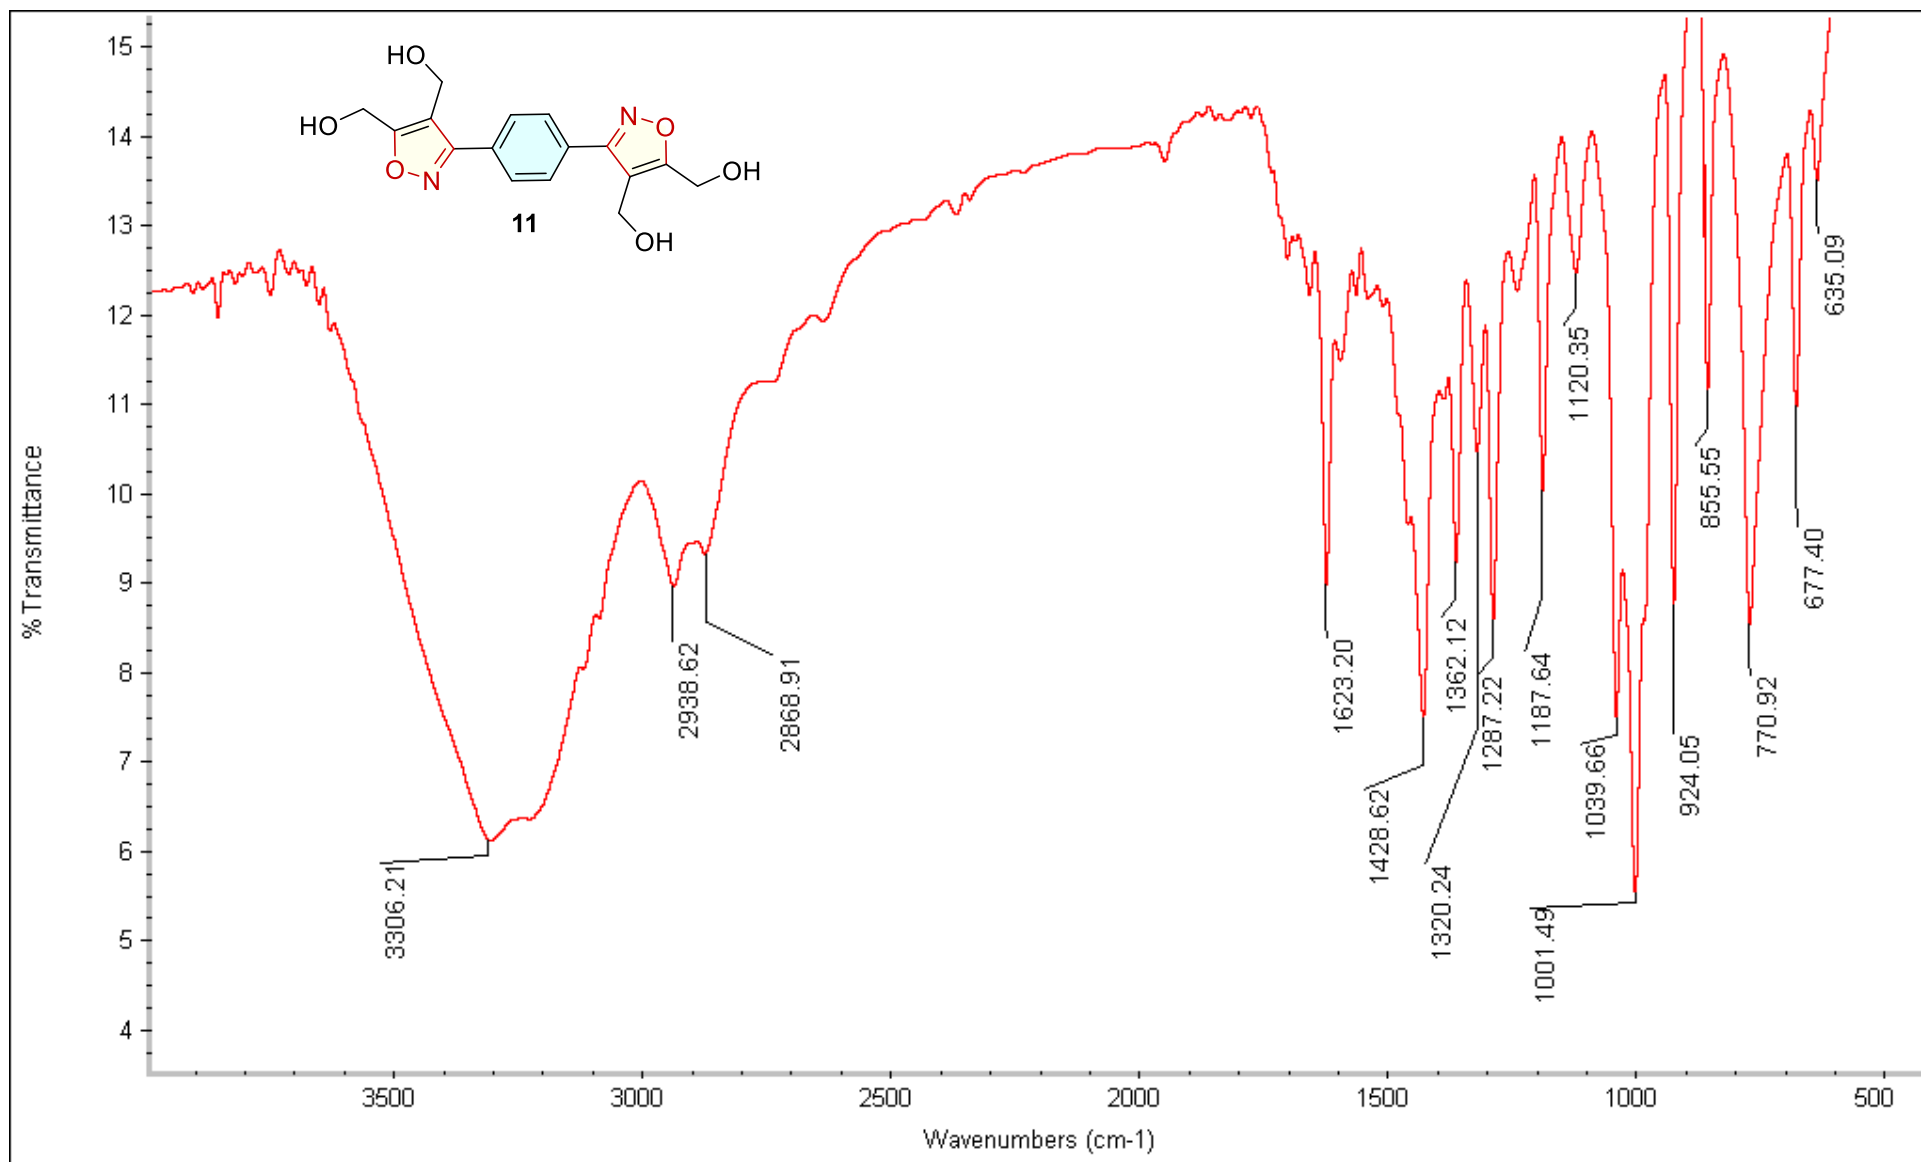

Figure S45. FTIR-Spectrum of Compound 11

Current Data Parameters  
NAME 1H  
EXPNO 343  
PROCNO 1

F2 - Acquisition Parameters  
Date\_ 20220808  
Time\_ 23.08  
INSTRUM spect  
PROBHD 5 mm QNP 1H/13  
PULPROG zg  
TD 32768  
SOLVENT DMSO  
NS 2  
DS 0  
SWH 7485.030 Hz  
FIDRES 0.228425 Hz  
AQ 2.1889024 sec  
RG 71.8  
DW 66.800 usec  
DE 6.00 usec  
TE 300.0 K  
D1 1.00000000 sec

==== CHANNEL f1 =====  
NUC1 1H  
P1 3.00 usec  
PL1 -4.00 dB  
SFO1 300.1330013 MHz

F2 - Processing parameters  
SI 32768  
SF 300.1300021 MHz  
WDW EM  
SSB 0  
LB 0.10 Hz  
GB 0  
PC 1.00

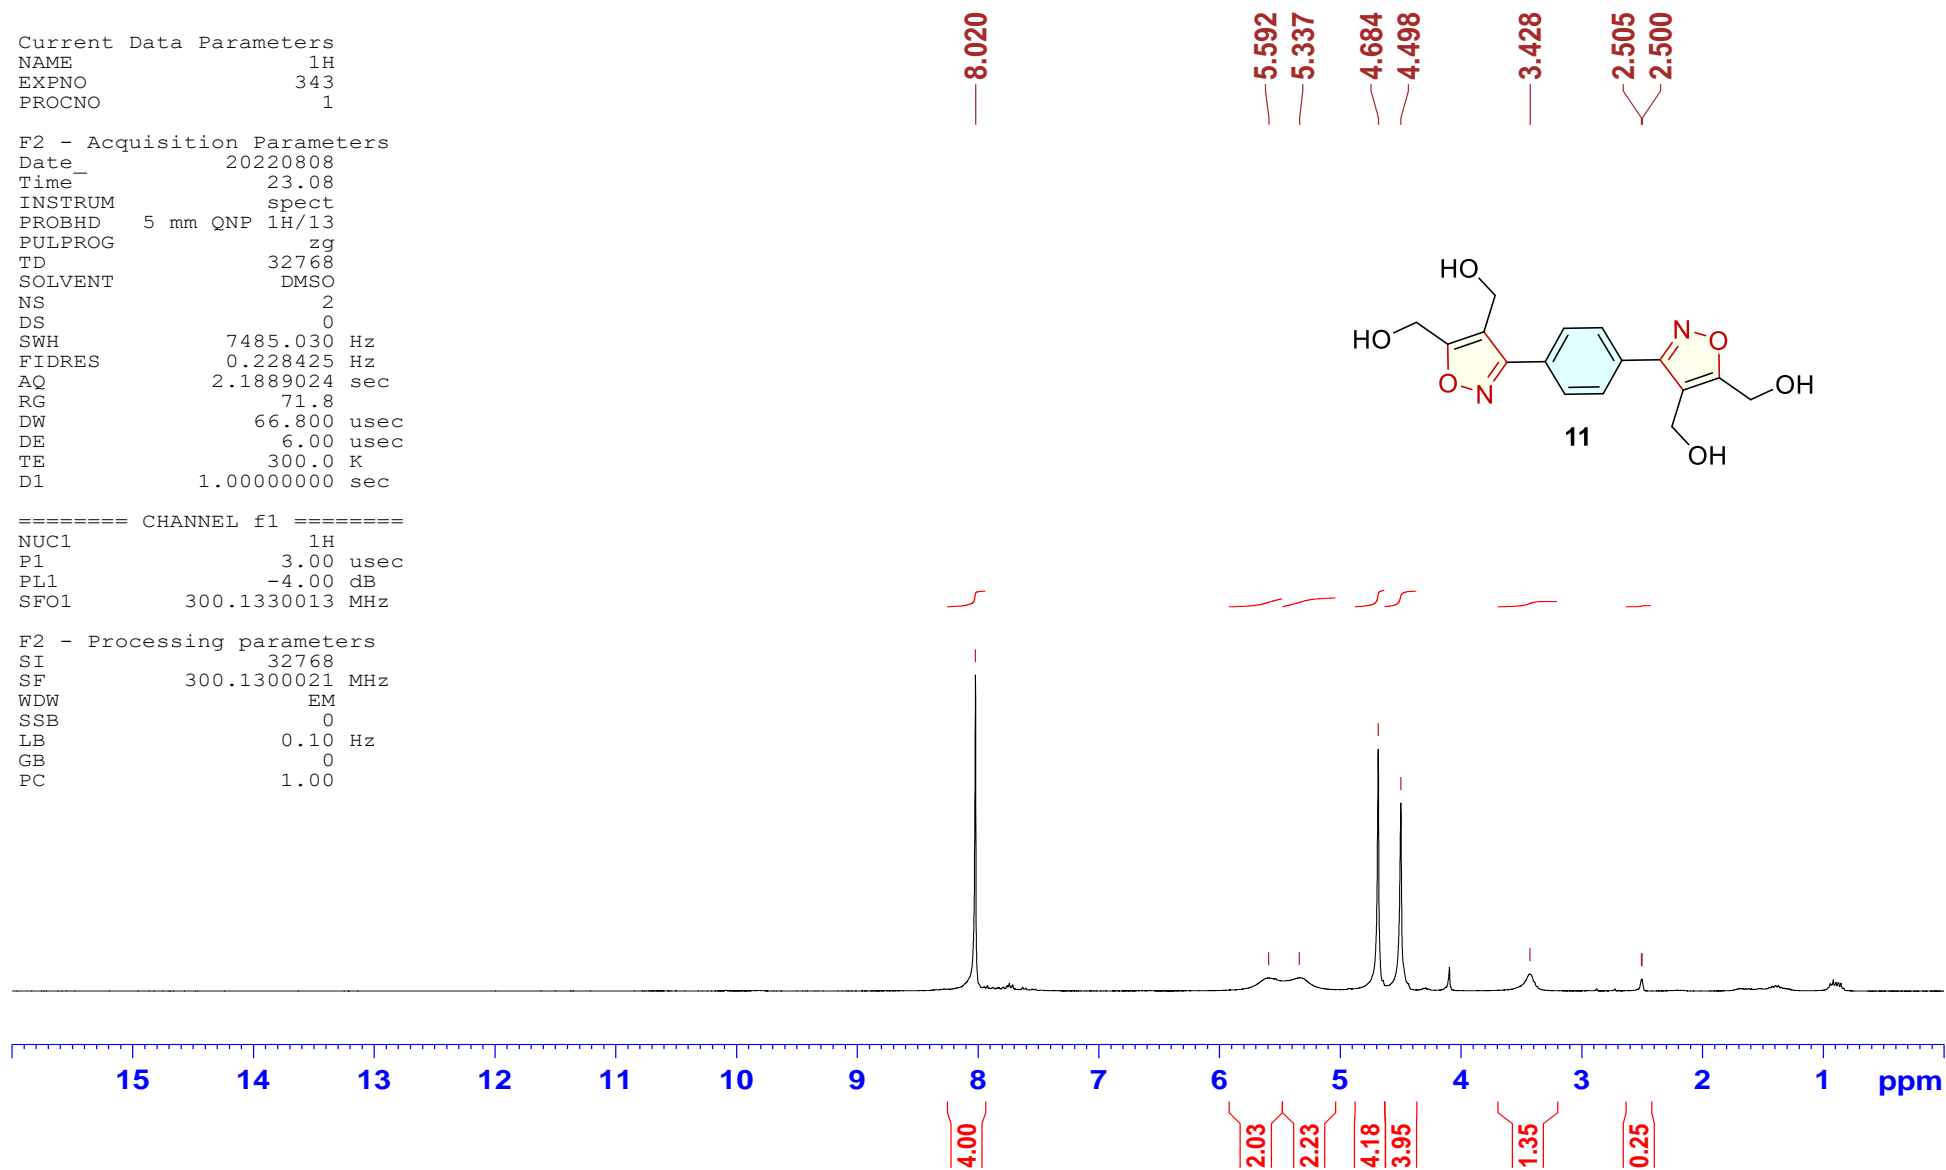

Figure S46. <sup>1</sup>H NMR Spectrum of Compound 11



Current Data Parameters  
NAME 13C  
EXPNO 343  
PROCNO 1

F2 - Acquisition Parameters  
Date\_ 20220808  
Time\_ 23.15  
INSTRUM spect  
PROBHD 5 mm QNP 1H/13  
PULPROG zgpg  
TD 32768  
SOLVENT DMSO  
NS 24  
DS 0  
SWH 19960.080 Hz  
FIDRES 0.609133 Hz  
AQ 0.8208384 sec  
RG 20642.5  
DW 25.050 usec  
DE 6.00 usec  
TE 300.0 K  
D1 1.00000000 sec  
d11 0.03000000 sec  
d12 0.00002000 sec

==== CHANNEL f1 =====  
NUC1 13C  
P1 4.00 usec  
PL1 -5.00 dB  
SFO1 75.4760505 MHz

==== CHANNEL f2 =====  
CPDPRG[2] waltz16  
NUC2 1H  
PCPD2 100.00 usec  
PL2 120.00 dB  
PL12 17.00 dB  
PL13 17.00 dB  
SFO2 300.1312005 MHz

F2 - Processing parameters  
SI 32768  
SF 75.4677814 MHz  
WDW EM  
SSB 0  
LB 1.00 Hz  
GB 0  
PC 1.40

170.32

161.44

130.26

128.56

114.63

JMS-SOHAN-338-13C

53.28  
51.44  
40.34  
40.06  
39.78  
39.50  
39.23  
38.95  
38.67

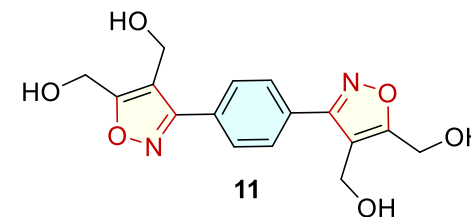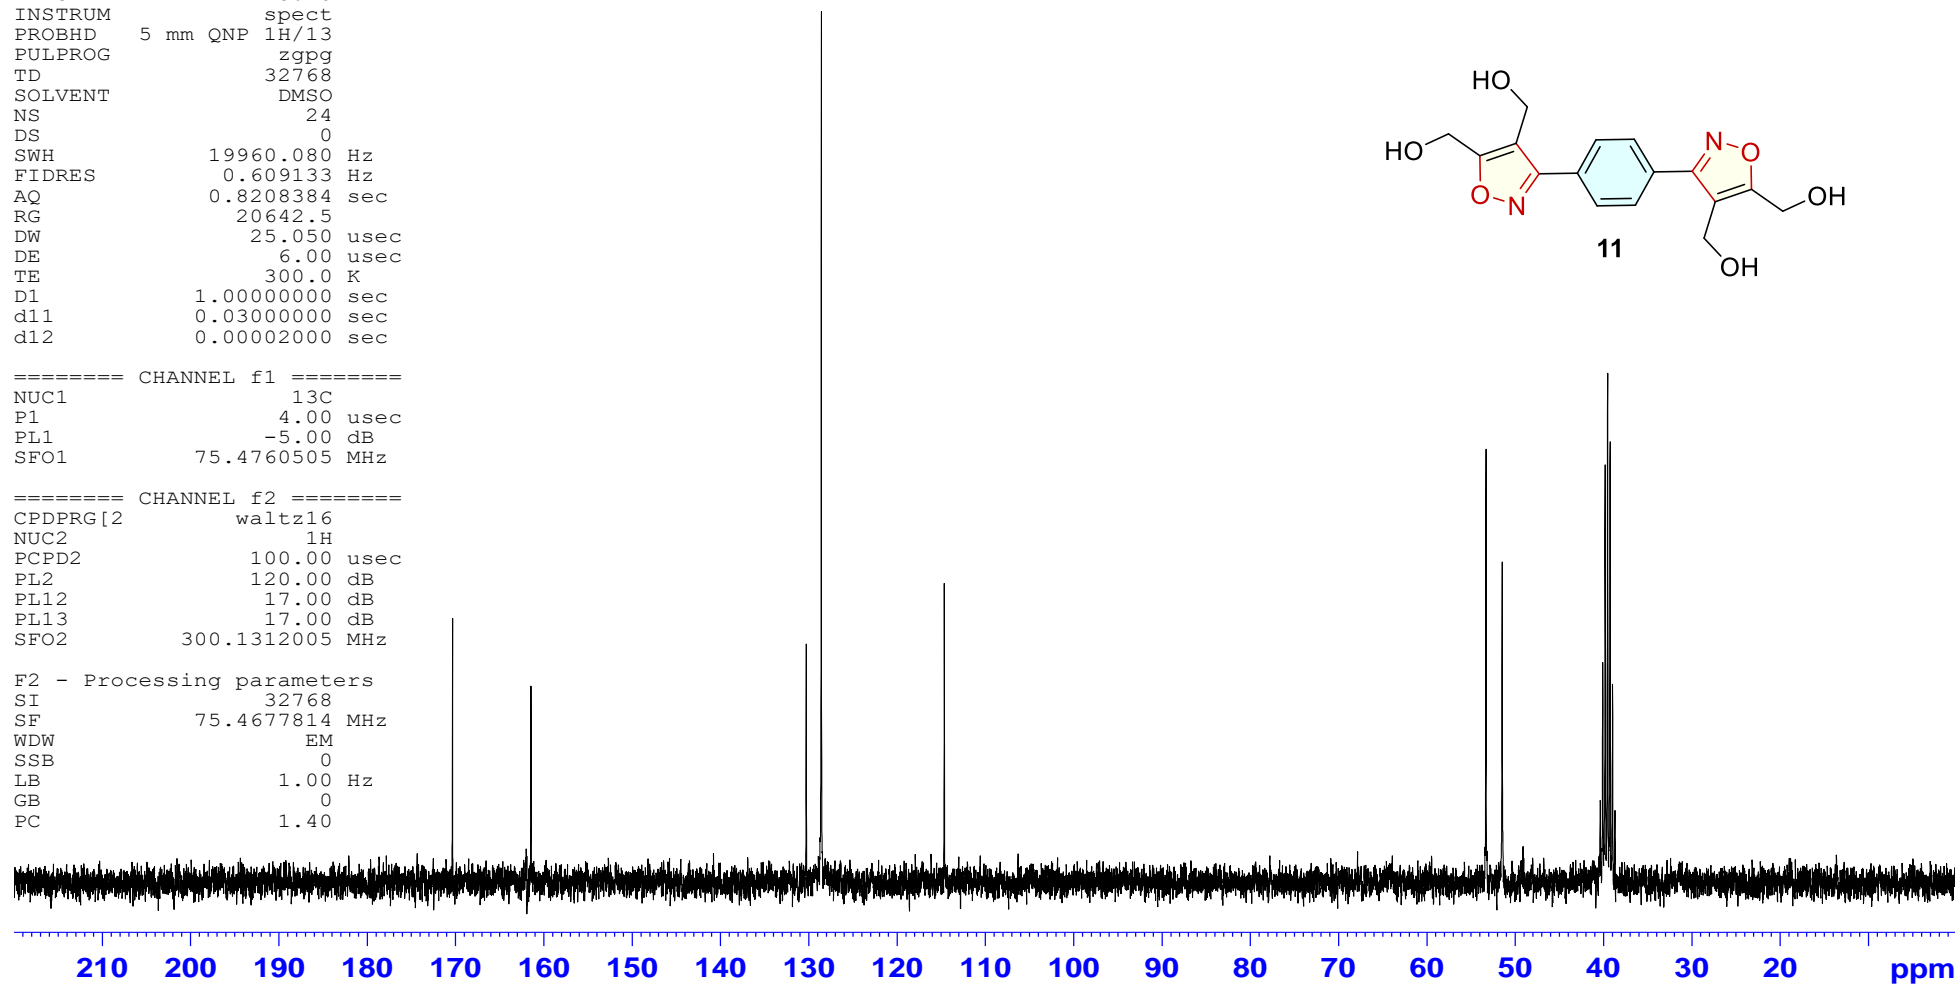

Figure S47. <sup>13</sup>C NMR Spectrum of Compound 11

Current Data Parameters  
NAME DEPT135  
EXPNO 99  
PROCNO 1

F2 - Acquisition Parameters  
Date\_ 20220808  
Time\_ 23.24  
INSTRUM spect  
PROBHD 5 mm QNP 1H/13  
PULPROG dept135  
TD 32768  
SOLVENT DMSO  
NS 9  
DS 16  
SWH 19960.080 Hz  
FIDRES 0.609133 Hz  
AQ 0.8208384 sec  
RG 18390.4  
DW 25.050 usec  
DE 6.00 usec  
TE 300.0 K  
CNST2 140.0000000  
D1 2.00000000 sec  
d2 0.00357143 sec  
d12 0.00002000 sec  
DELTA 0.00000891 sec

==== CHANNEL f1 =====  
NUC1 13C  
P1 7.00 usec  
p2 14.00 usec  
P2 14.00 usec

==== CHANNEL f2 =====  
CPDPRG[2] waltz16  
NUC2 1H  
P3 6.10 usec  
p4 12.20 usec  
PCPD2 100.00 usec  
PL2 -6.00 dB  
PL12 18.54 dB  
SFO2 300.1312005 MHz

F2 - Processing parameters  
SI 32768  
SF 75.4677817 MHz  
WDW EM  
SSB 0  
LB 1.00 Hz  
GB 0  
PC 1.40

128.55

53.27  
51.44

JMS-SOHAN-338-DEPT135

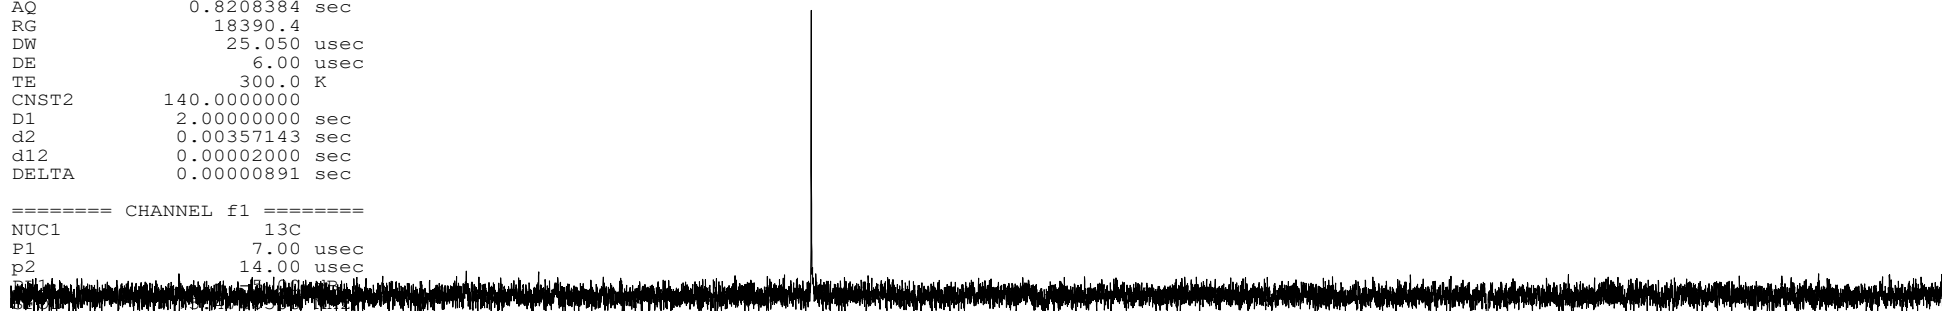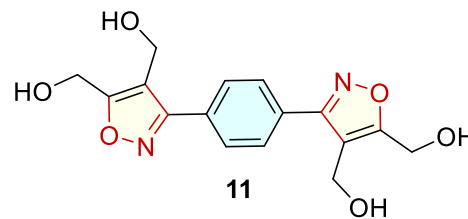

210 200 190 180 170 160 150 140 130 120 110 100 90 80 70 60 50 40 30 20 10 ppm

Figure S48. <sup>13</sup>C-DEPT135 NMR Spectrum of Compound 11

Sample: SOHAN-338 at 5°C  
Size: 0.1000 mg  
Method: Ramp  
Comment: Cell constant calibration

DSC

File: C:\...\DSC\SOHAN\SOHAN-338 at 5°C.001  
Operator: SOHAN  
Run Date: 22-Aug-2022 20:37  
Instrument: DSC Q2000 V24.11 Build 124

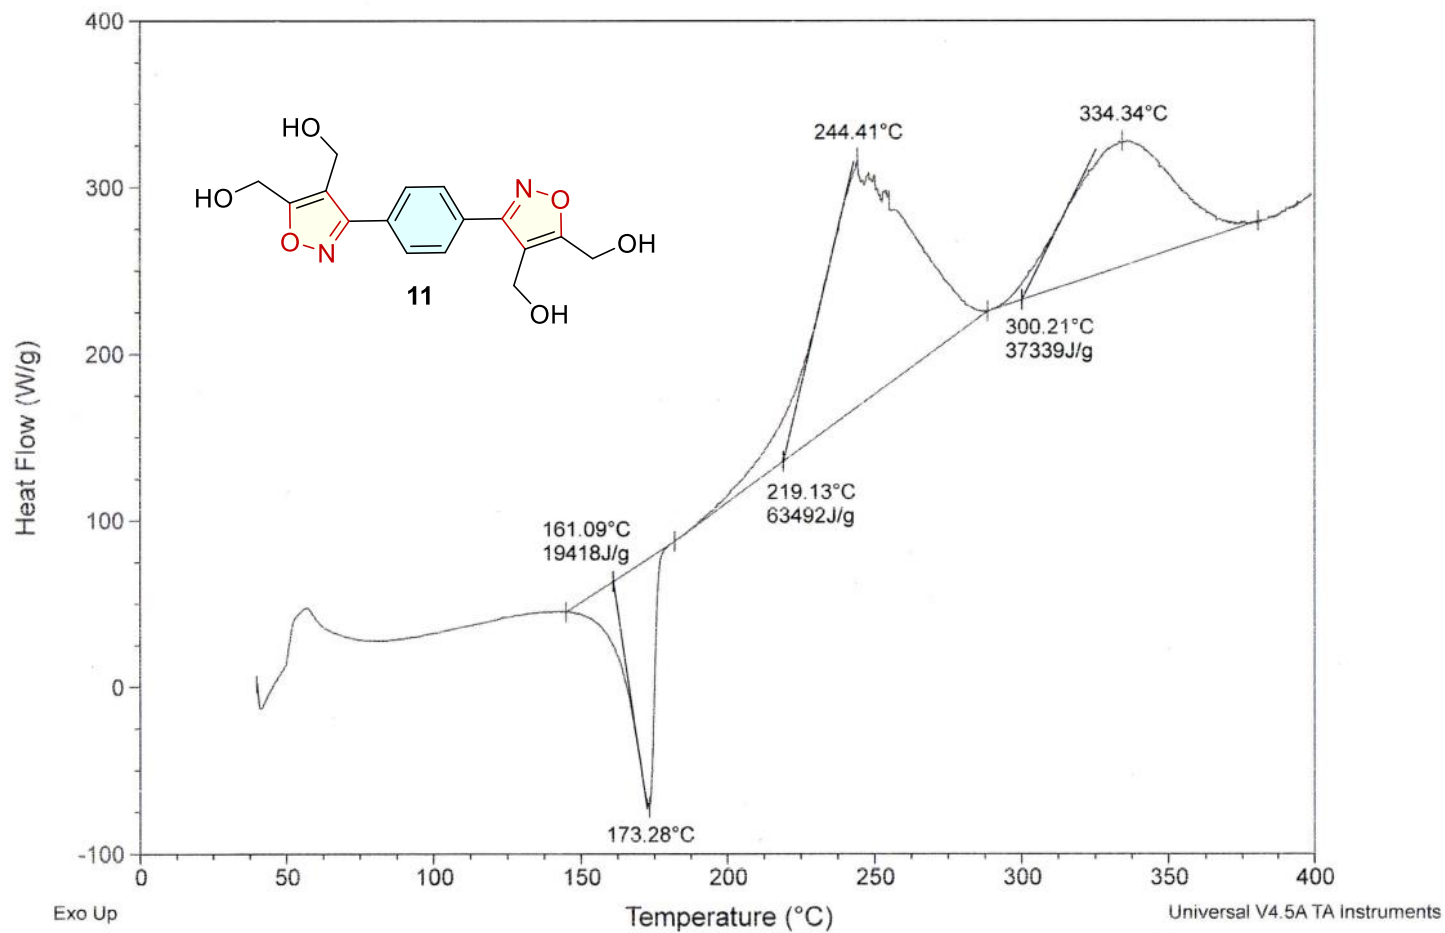

Figure S49. DSC of compound 11 at 5 °C min<sup>-1</sup>

Sample: SOHAN-338 at 5°C  
Size: 1.8990 mg  
Method: Ramp

### TGA

File: C:\...TGA\Sohan\SOHAN-338 at 5°C.001  
Operator: SOHAN  
Run Date: 22-Aug-2022 20:52  
Instrument: TGA Q50 V20.13 Build 39

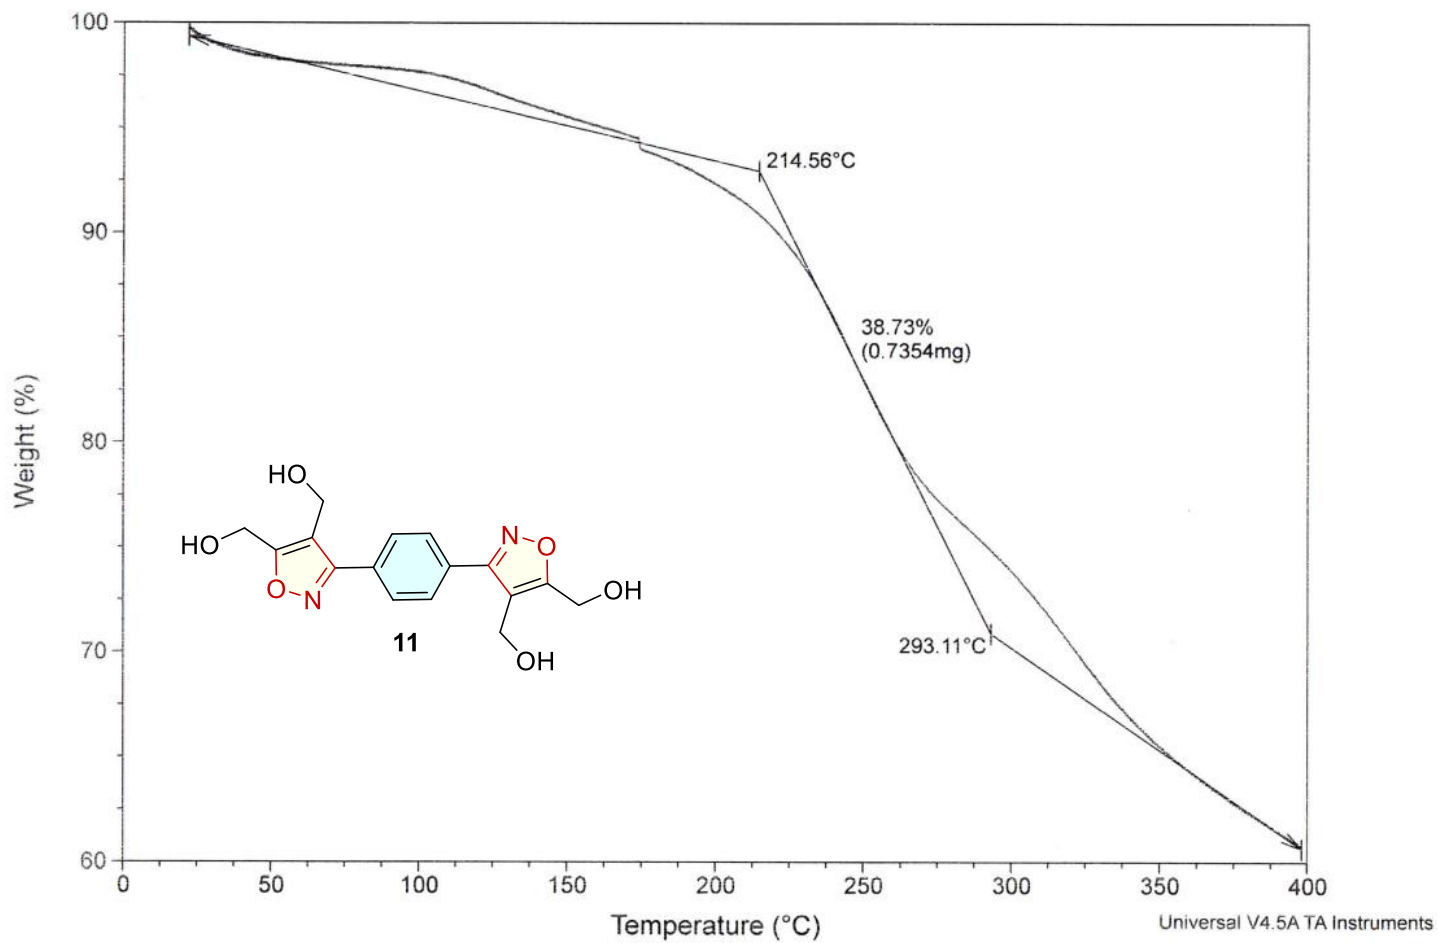

Figure S50. TGA of compound 11 at 5 °C min<sup>-1</sup>

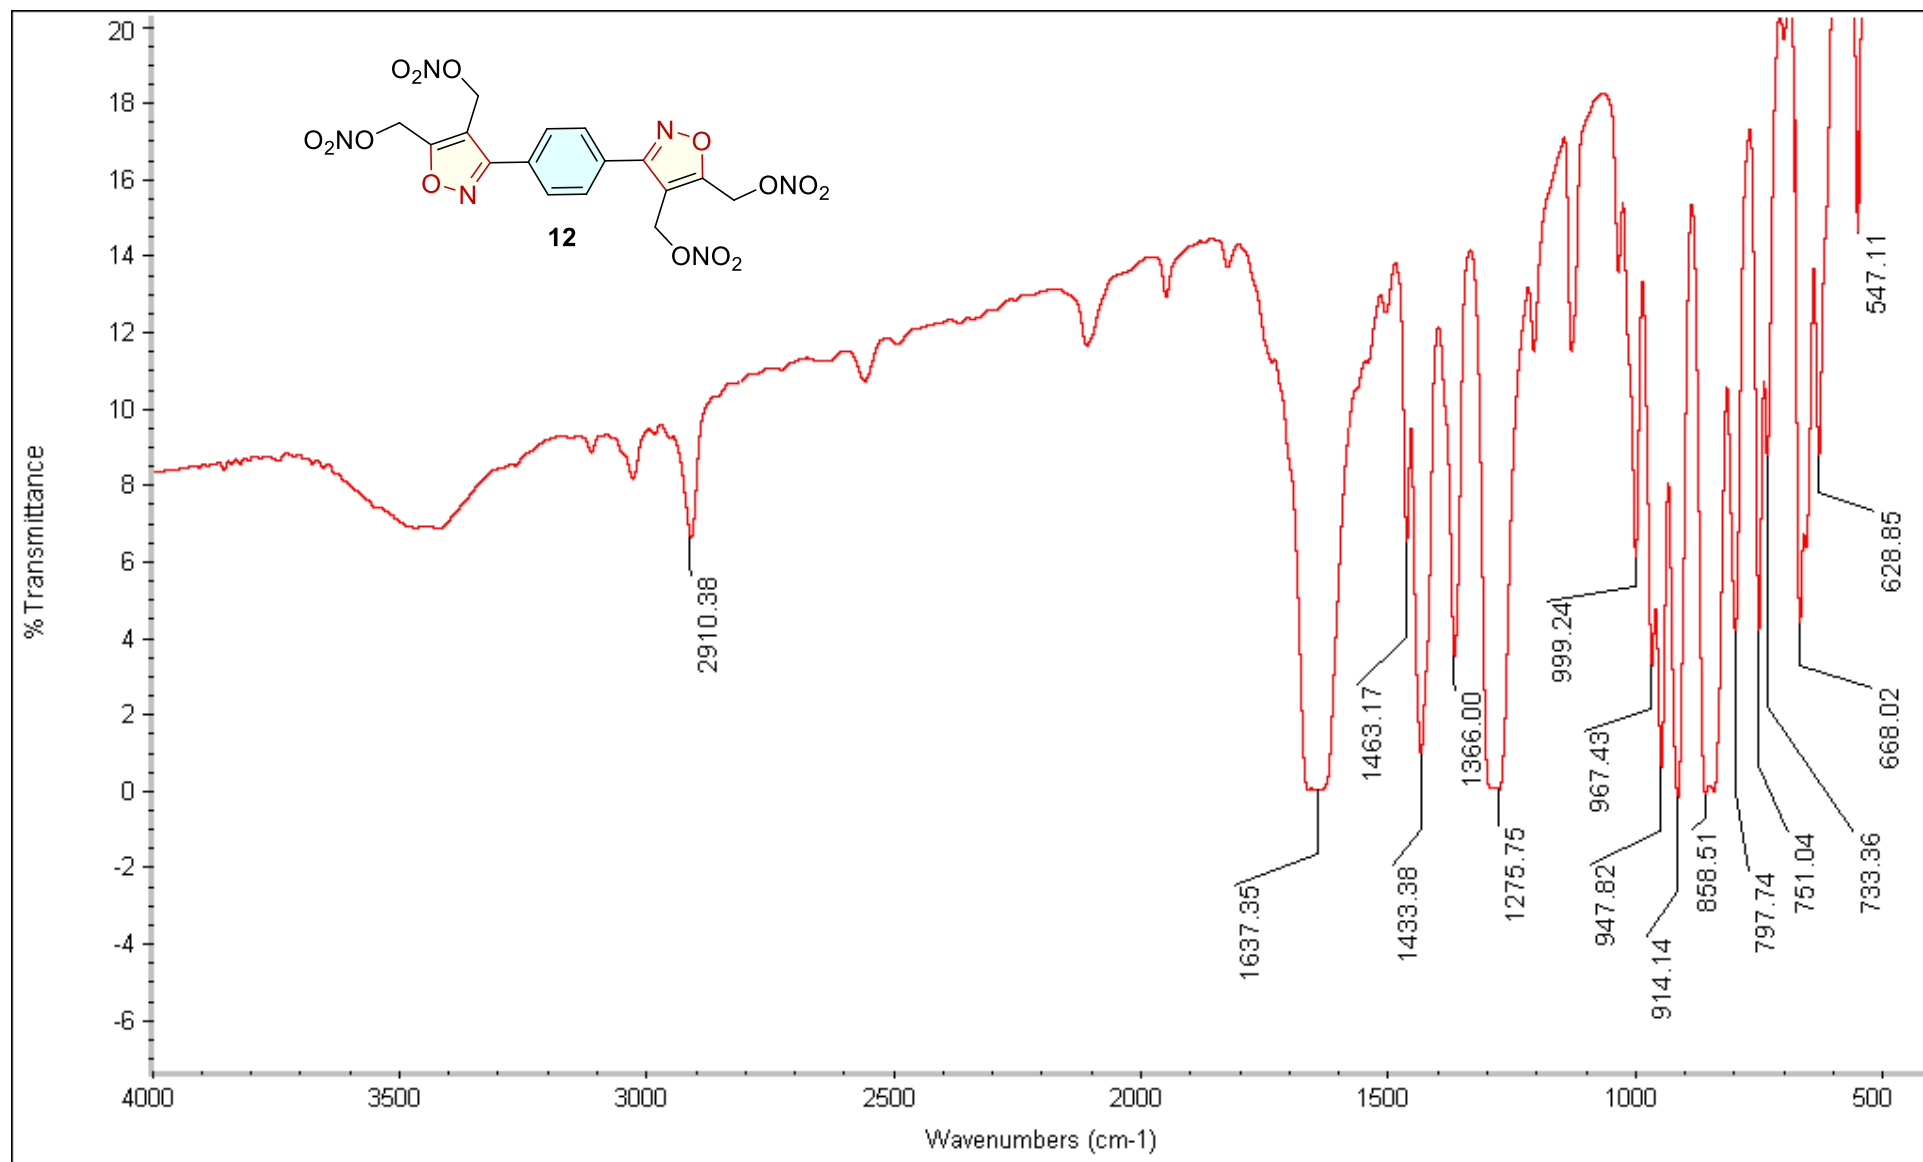

Figure S51. FTIR-Spectrum of Compound 12

Current Data Parameters  
NAME 1H  
EXPNO 352  
PROCNO 1

F2 - Acquisition Parameters  
Date\_ 20220819  
Time\_ 1.33  
INSTRUM spect  
PROBHD 5 mm QNP 1H/13  
PULPROG zg  
TD 32768  
SOLVENT DMSO  
NS 5  
DS 0  
SWH 7485.030 Hz  
FIDRES 0.228425 Hz  
AQ 2.1889024 sec  
RG 161.3  
DW 66.800 usec  
DE 6.00 usec  
TE 300.0 K  
D1 1.00000000 sec

==== CHANNEL f1 =====  
NUC1 1H  
P1 3.00 usec  
PL1 -4.00 dB  
SFO1 300.1330013 MHz

F2 - Processing parameters  
SI 32768  
SF 300.1300035 MHz  
WDW EM  
SSB 0  
LB 0.10 Hz  
GB 0  
PC 1.00

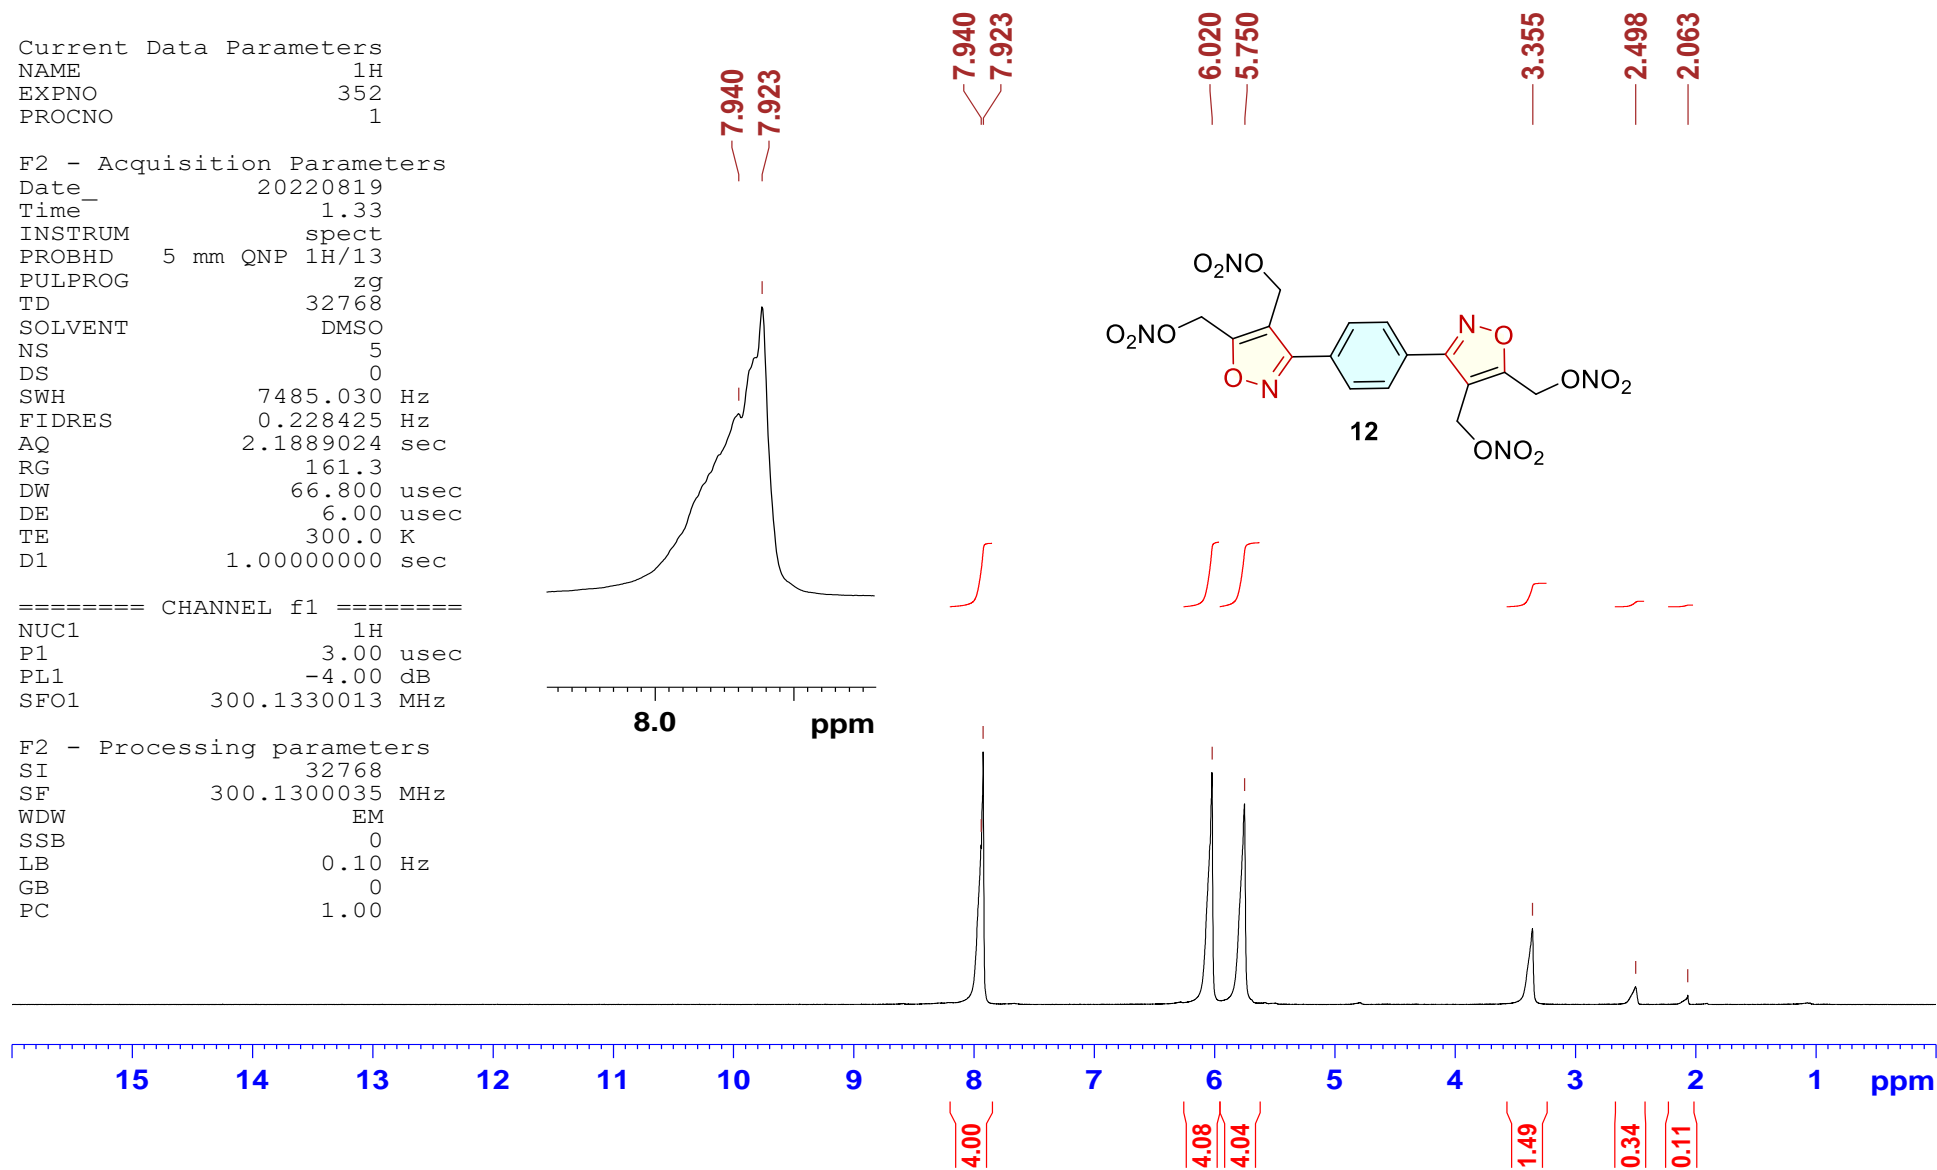

Figure S52. <sup>1</sup>H NMR Spectrum of Compound 12

Current Data Parameters  
 NAME 13C  
 EXPNO 351  
 PROCNO 1

F2 - Acquisition Parameters  
 Date\_ 20220819  
 Time\_ 1.34  
 INSTRUM spect  
 PROBHD 5 mm QNP 1H/13  
 PULPROG zgpg  
 TD 32768  
 SOLVENT DMSO  
 NS 115  
 DS 0  
 SWH 19960.080 Hz  
 FIDRES 0.609133 Hz  
 AQ 0.8208384 sec  
 RG 20642.5  
 DW 25.050 usec  
 DE 6.00 usec  
 TE 300.0 K  
 D1 1.00000000 sec  
 d11 0.03000000 sec  
 d12 0.00002000 sec

==== CHANNEL f1 =====  
 NUC1 13C  
 P1 4.00 usec  
 PL1 -5.00 dB  
 SFO1 75.4760505 MHz

==== CHANNEL f2 =====  
 CPDPRG[2] waltz16  
 NUC2 1H  
 PCPD2 100.00 usec  
 PL2 120.00 dB  
 PL12 17.00 dB  
 PL13 17.00 dB  
 SFO2 300.1312005 MHz

F2 - Processing parameters  
 SI 32768  
 SF 75.4677821 MHz  
 WDW EM  
 SSB 0  
 LB 1.00 Hz  
 GB 0  
 PC 1.40

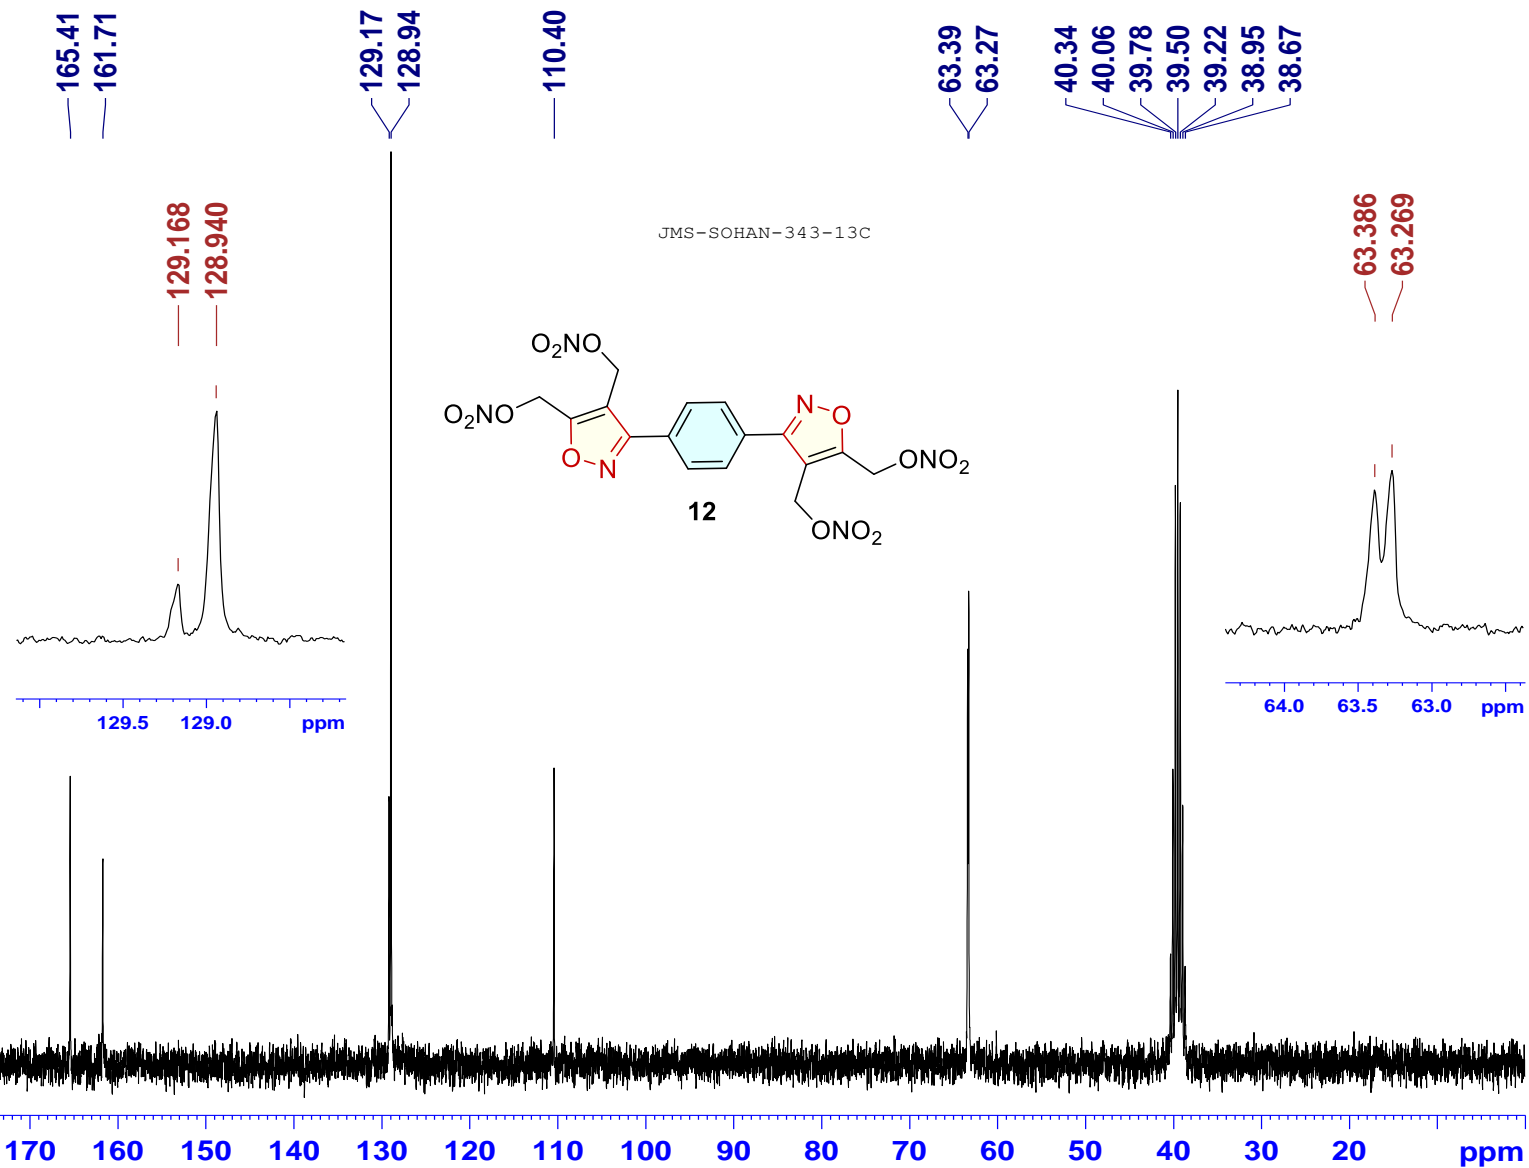

Figure S53. <sup>13</sup>C NMR Spectrum of Compound 12

15N{1H}\_5894 Sohan 343

Current Data Parameters  
NAME New folder  
EXPNO 5894  
PROCNO 1

F2 - Acquisition Parameters  
Date\_ 20220926  
Time\_ 18.07  
INSTRUM spect  
PROBHD 5 mm PABBO BB/  
PULPROG zgig  
TD 16248  
SOLVENT DMSO  
NS 5626  
DS 0  
SWH 40760.871 Hz  
FIDRES 2.508670 Hz  
AQ 0.1993088 sec  
RG 27.83  
DW 12.267 usec  
DE 8.00 usec  
TE 303.2 K  
D1 10.0000000 sec  
D11 0.03000000 sec  
TD0 10240

==== CHANNEL f1 =====  
SFO1 50.6963210 MHz  
NUC1 15N  
P1 12.00 usec  
PLW1 155.00000000 W

==== CHANNEL f2 =====  
SFO2 500.1920008 MHz  
NUC2 1H  
CPDPRG[2] waltz16  
PCPD2 80.00 usec  
PLW2 26.00000000 W  
PLW12 0.27649999 W

F2 - Processing parameters  
SI 32768  
SF 50.7031345 MHz  
WDW EM  
SSB 0  
LB 1.00 Hz  
GB 0  
PC 0.20

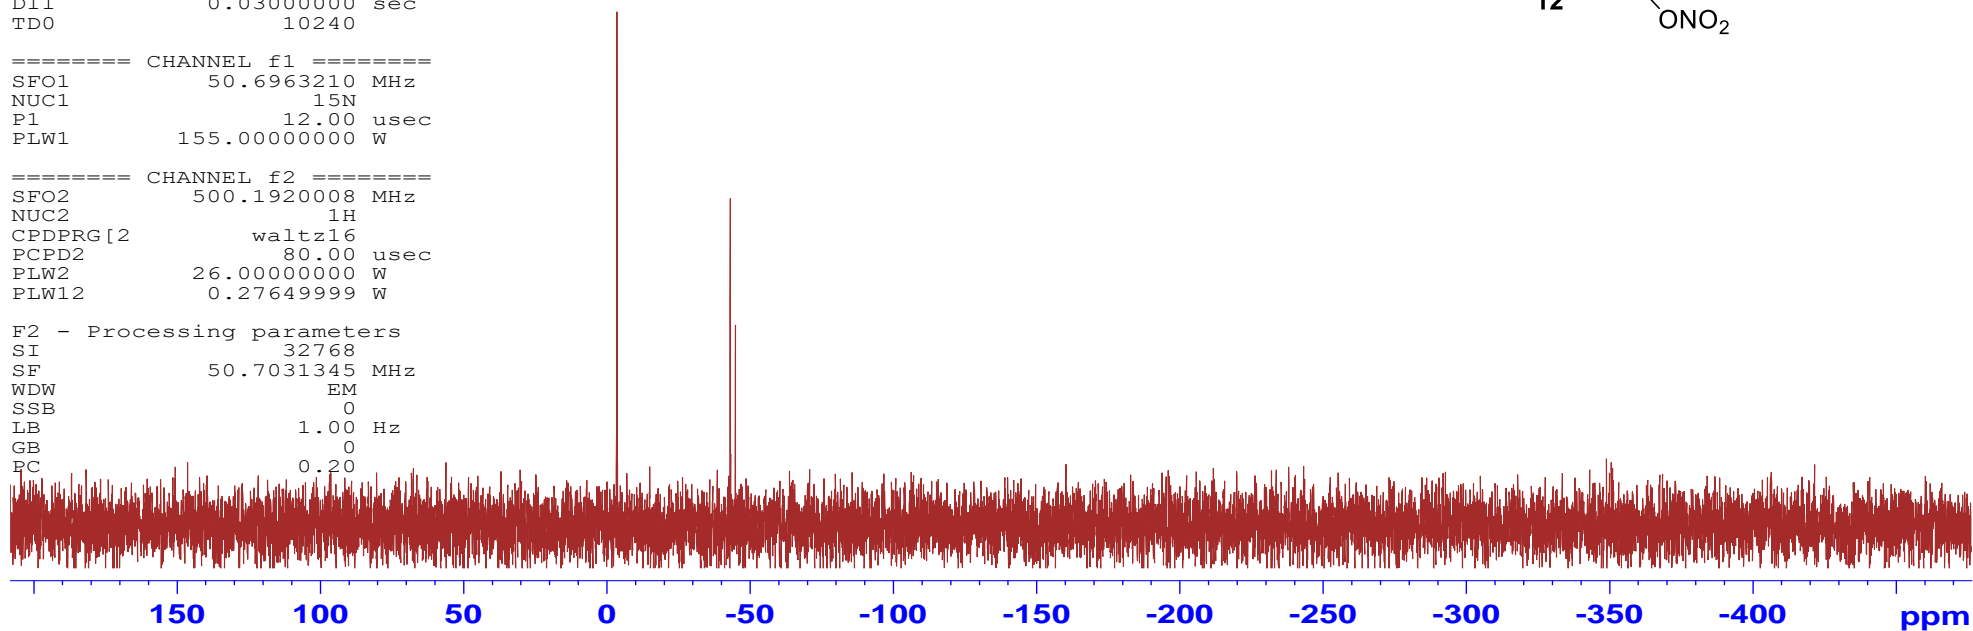

Figure S54. <sup>15</sup>N NMR Spectrum of Compound 12 in DMSO-d<sub>6</sub> (at 50.70 MHz)



Sample: SOHAN-343 at 5°C  
Size: 0.1000 mg  
Method: Ramp  
Comment: Cell constant calibration

DSC

File: C:\DSC\SOHAN\SOHAN-343 at 5°C.001  
Operator: SOHAN  
Run Date: 22-Aug-2022 09:40  
Instrument: DSC Q2000 V24.11 Build 124

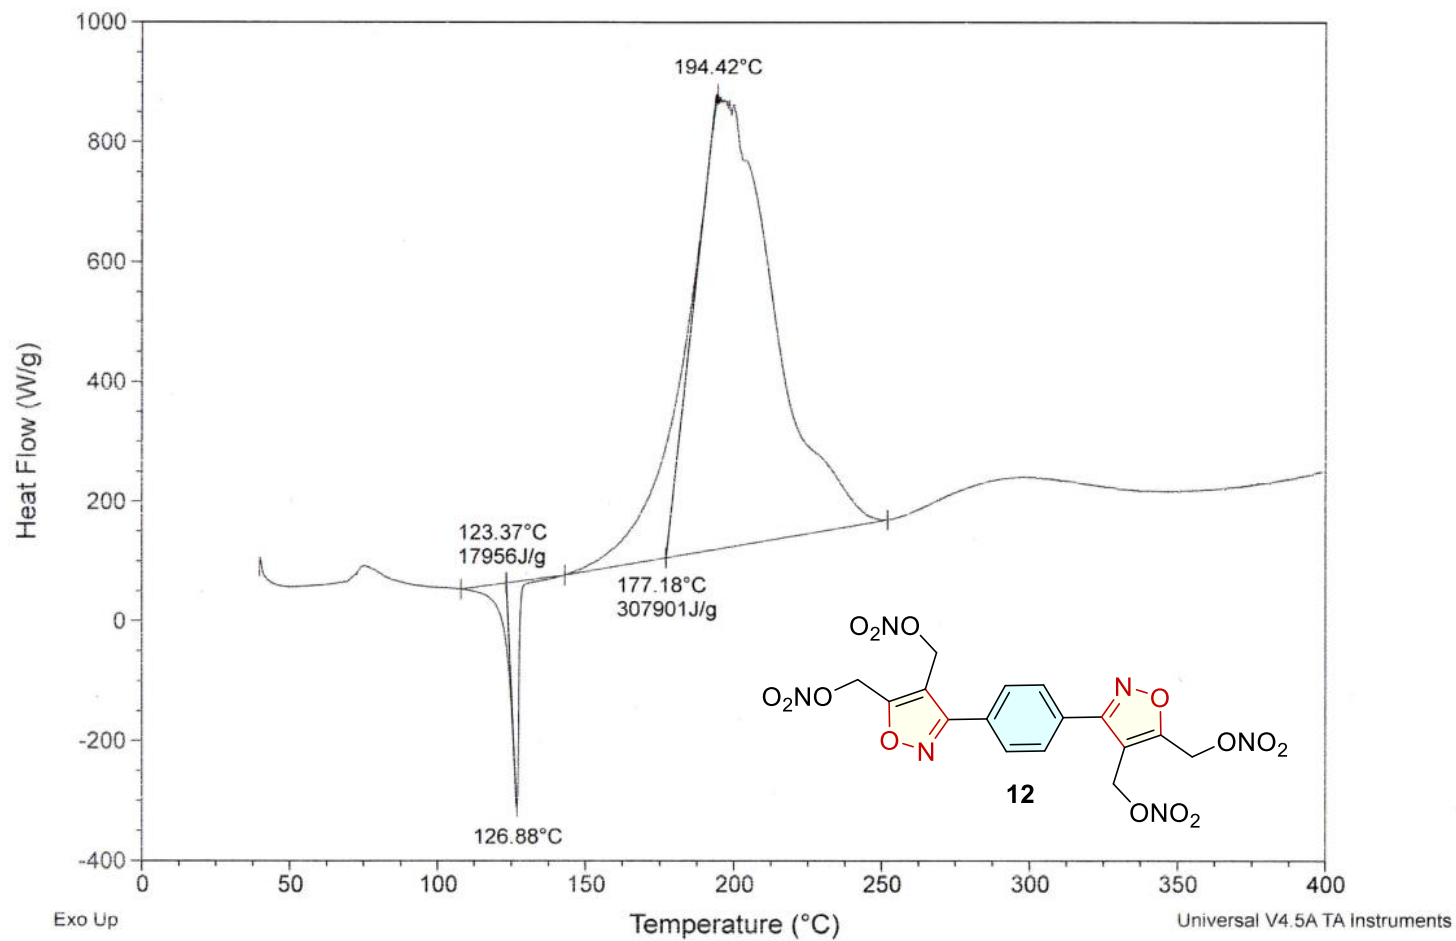

Figure S55. DSC of compound 12 at 5 °C min<sup>-1</sup>

Sample: SOHAN-343 at 5°C  
Size: 2.1230 mg  
Method: Ramp

TGA

File: C:\...TGA\Sohan\SOHAN-343 at 5°C.001  
Operator: SOHAN  
Run Date: 22-Aug-2022 09:53  
Instrument: TGA Q50 V20.13 Build 39

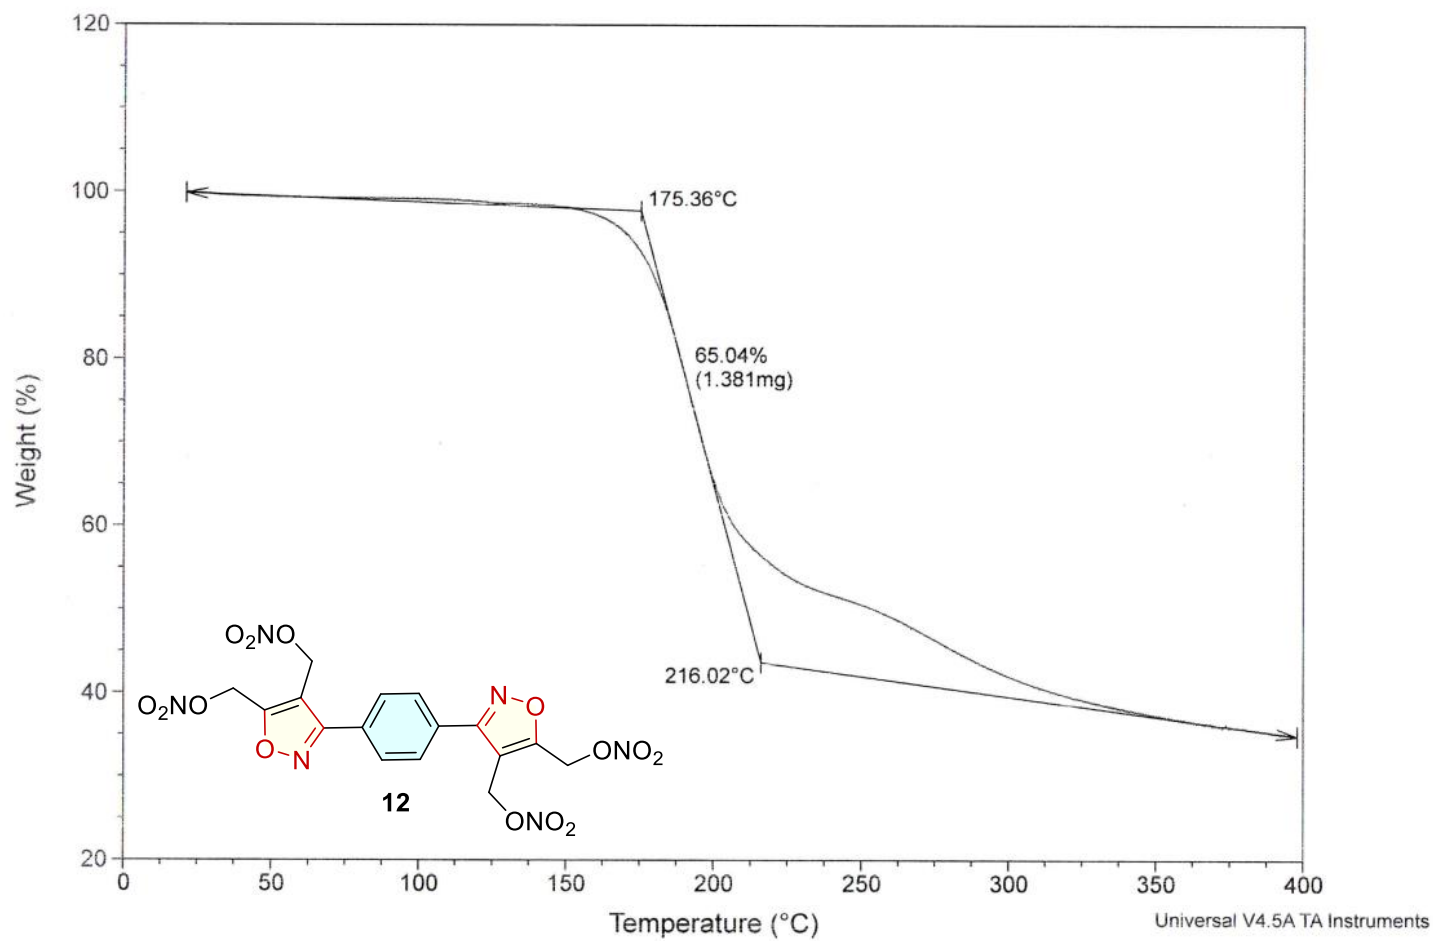

Figure S56. TGA of compound 12 at 5 °C min<sup>-1</sup>

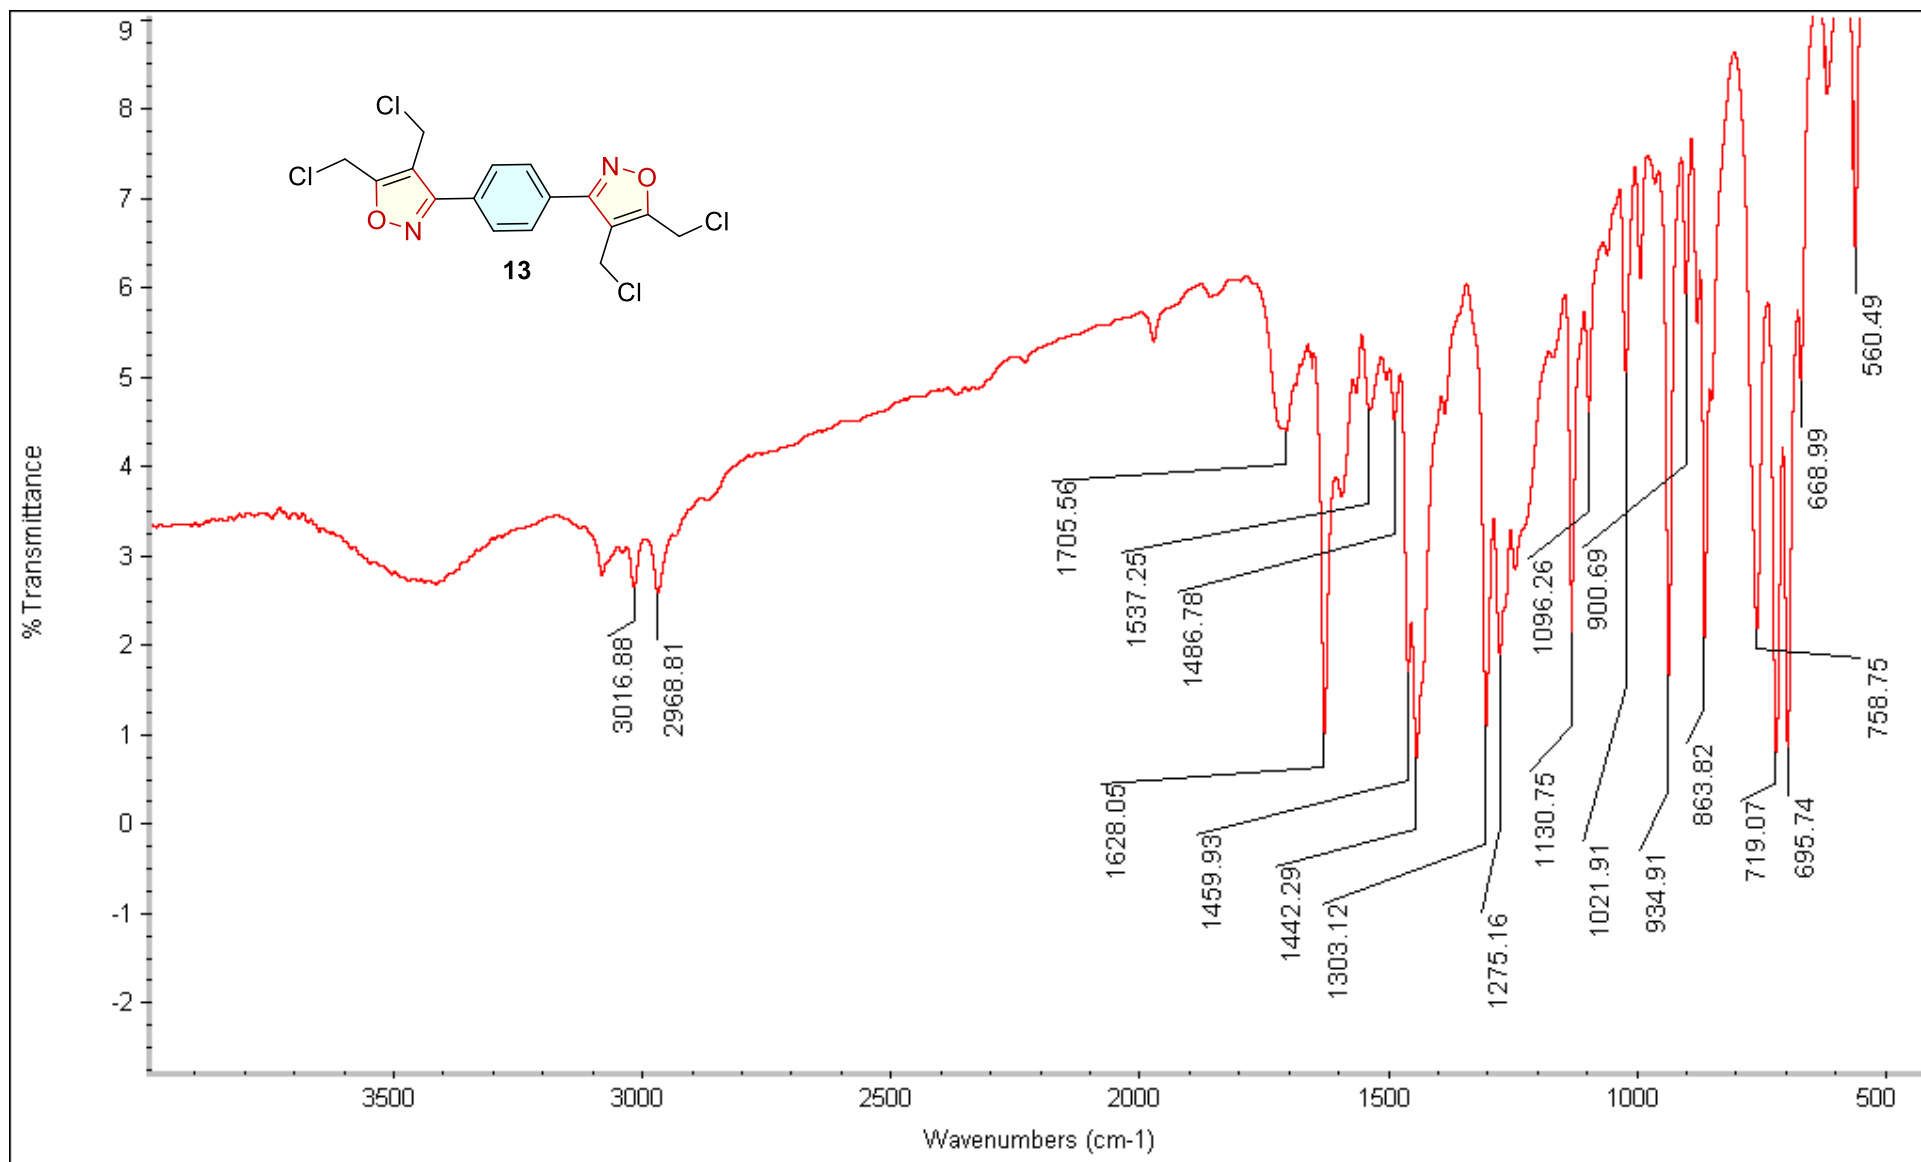

**Figure S57.** FTIR-Spectrum of Compound 13

Current Data Parameters  
NAME 1H  
EXPNO 349  
PROCNO 1

F2 - Acquisition Parameters  
Date\_ 20220817  
Time\_ 12.15  
INSTRUM spect  
PROBHD 5 mm QNP 1H/13  
PULPROG zg  
TD 32768  
SOLVENT DMSO  
NS 8  
DS 0  
SWH 7485.030 Hz  
FIDRES 0.228425 Hz  
AQ 2.1889024 sec  
RG 128  
DW 66.800 usec  
DE 6.00 usec  
TE 300.0 K  
D1 1.00000000 sec

==== CHANNEL f1 =====  
NUC1 1H  
P1 3.00 usec  
PL1 -4.00 dB  
SFO1 300.1330013 MHz

F2 - Processing parameters  
SI 32768  
SF 300.1300021 MHz  
WDW EM  
SSB 0  
LB 0.10 Hz  
GB 0  
PC 1.00

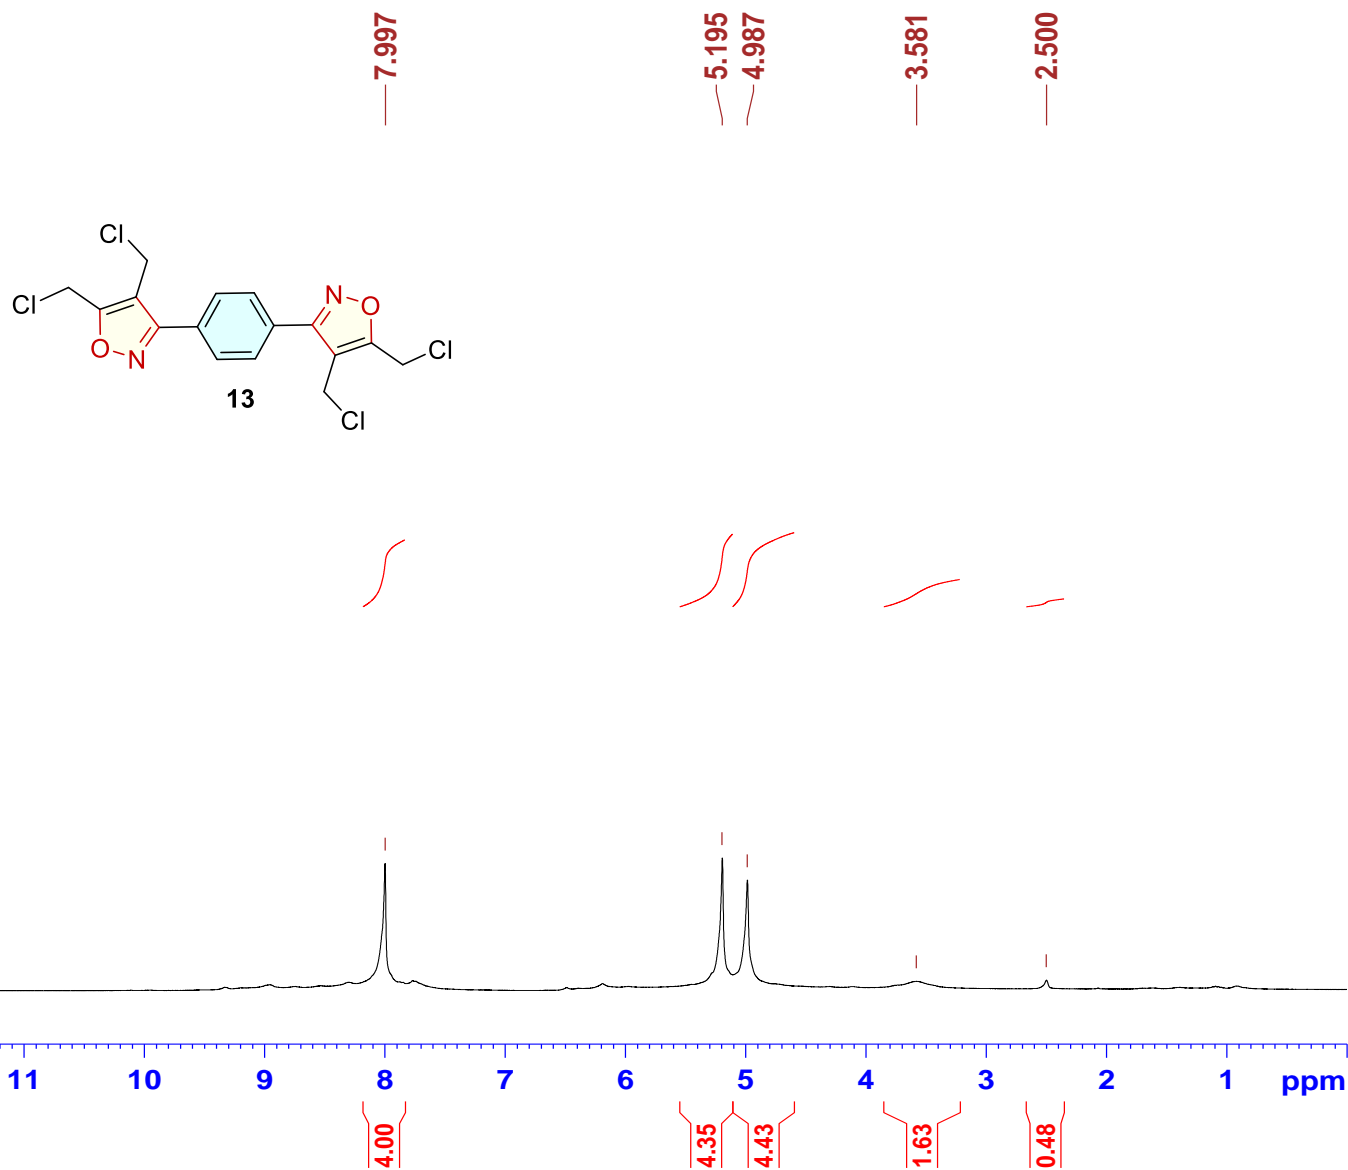

Figure S58. <sup>1</sup>H NMR Spectrum of Compound 13

Current Data Parameters  
NAME 13C  
EXPNO 349  
PROCNO 1

F2 - Acquisition Parameters  
Date\_ 20220817  
Time\_ 12.37  
INSTRUM spect  
PROBHD 5 mm QNP 1H/13  
PULPROG zgpg  
TD 32768  
SOLVENT DMSO  
NS 197  
DS 0  
SWH 19960.080 Hz  
FIDRES 0.609133 Hz  
AQ 0.8208384 sec  
RG 20642.5  
DW 25.050 usec  
DE 6.00 usec  
TE 300.0 K  
D1 1.00000000 sec  
d11 0.03000000 sec  
d12 0.00002000 sec

=====  
CHANNEL f1  
NUC1 13C  
P1 4.00 usec  
PL1 -5.00 dB  
SFO1 75.4760505 MHz

=====  
CHANNEL f2  
CPDPRG[2] waltz16  
NUC2 1H  
PCPD2 100.00 usec  
PL2 120.00 dB  
PL12 17.00 dB  
PL13 17.00 dB  
SFO2 300.1312005 MHz

F2 - Processing parameters  
SI 32768  
SF 75.4677855 MHz  
WDW EM  
SSB 0  
LB 1.00 Hz  
GB 0  
PC 1.40

166.98  
160.94

129.47  
128.63

113.78

40.33  
40.06  
39.78  
39.50  
39.23  
38.94  
38.69  
33.85  
32.55

JMS-SOHAN-344-13C

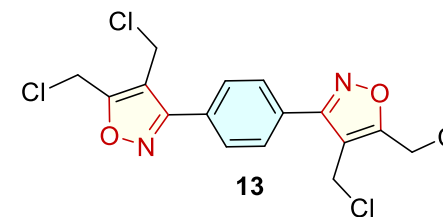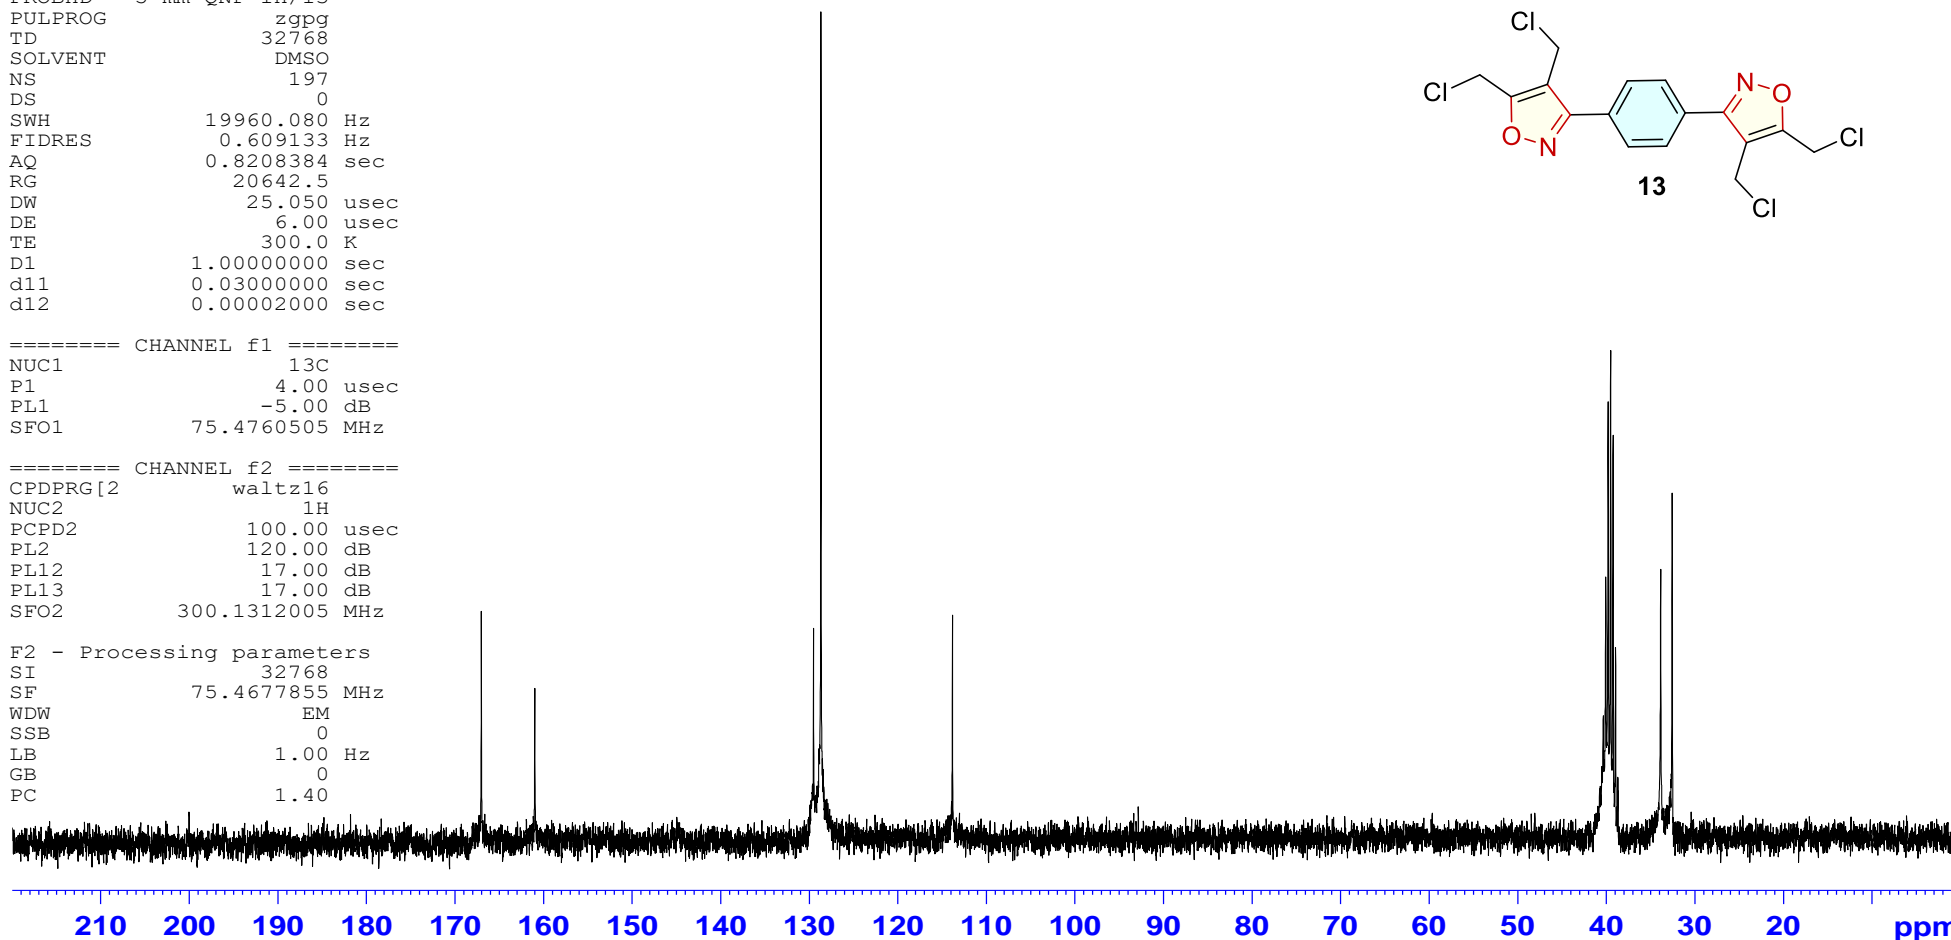

Figure S59. <sup>13</sup>C NMR Spectrum of Compound 13

Current Data Parameters  
NAME DEPT135  
EXPNO 101  
PROCNO 1

F2 - Acquisition Parameters  
Date\_ 20220817  
Time 12.46  
INSTRUM spect  
PROBHD 5 mm QNP 1H/13  
PULPROG dept135  
TD 32768  
SOLVENT DMSO  
NS 163  
DS 16  
SWH 19960.080 Hz  
FIDRES 0.609133 Hz  
AQ 0.8208384 sec  
RG 18390.4  
DW 25.050 usec  
DE 6.00 usec  
TE 300.0 K  
CNST2 140.0000000  
D1 2.00000000 sec  
d2 0.00357143 sec  
d12 0.00002000 sec  
DELTA 0.00000891 sec

==== CHANNEL f1 =====  
NUC1 13C  
P1 7.00 usec  
PL1 0.00 dB  
SFO1 75.4760505 MHz

==== CHANNEL f2 =====  
CPDPRG[2] waltz16  
NUC2 1H  
P3 6.10 usec  
p4 12.20 usec  
PCPD2 100.00 usec  
PL2 -6.00 dB  
PL12 18.54 dB  
SFO2 300.1312005 MHz

F2 - Processing parameters  
SI 32768  
SF 75.4677853 MHz  
WDW EM  
SSB 0  
LB 1.00 Hz  
GB 0  
PC 1.40

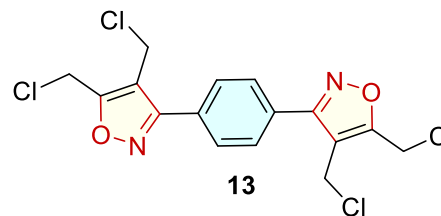

JMS-SOHAN-344-DEPT135

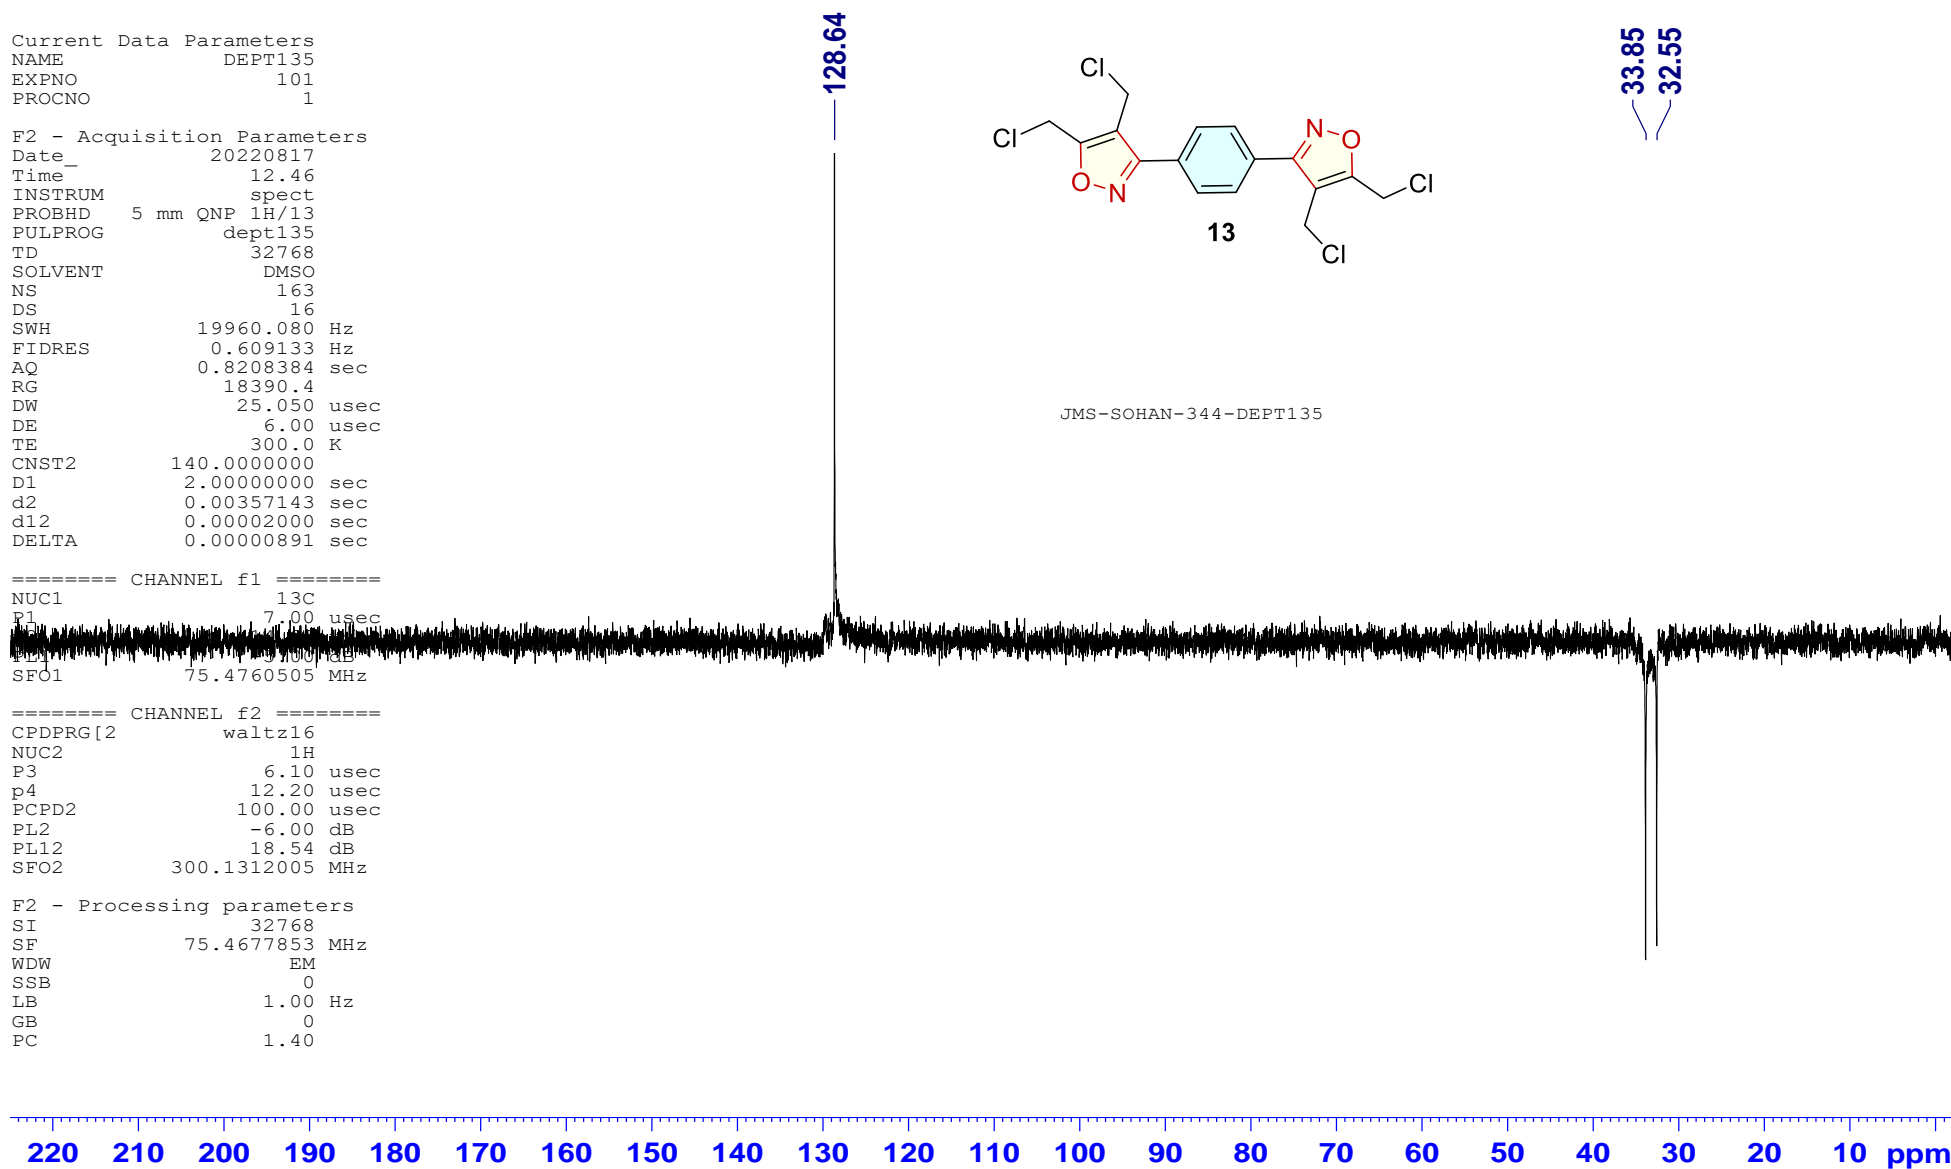

Figure S60. <sup>13</sup>C-DEPT135 NMR Spectrum of Compound 13

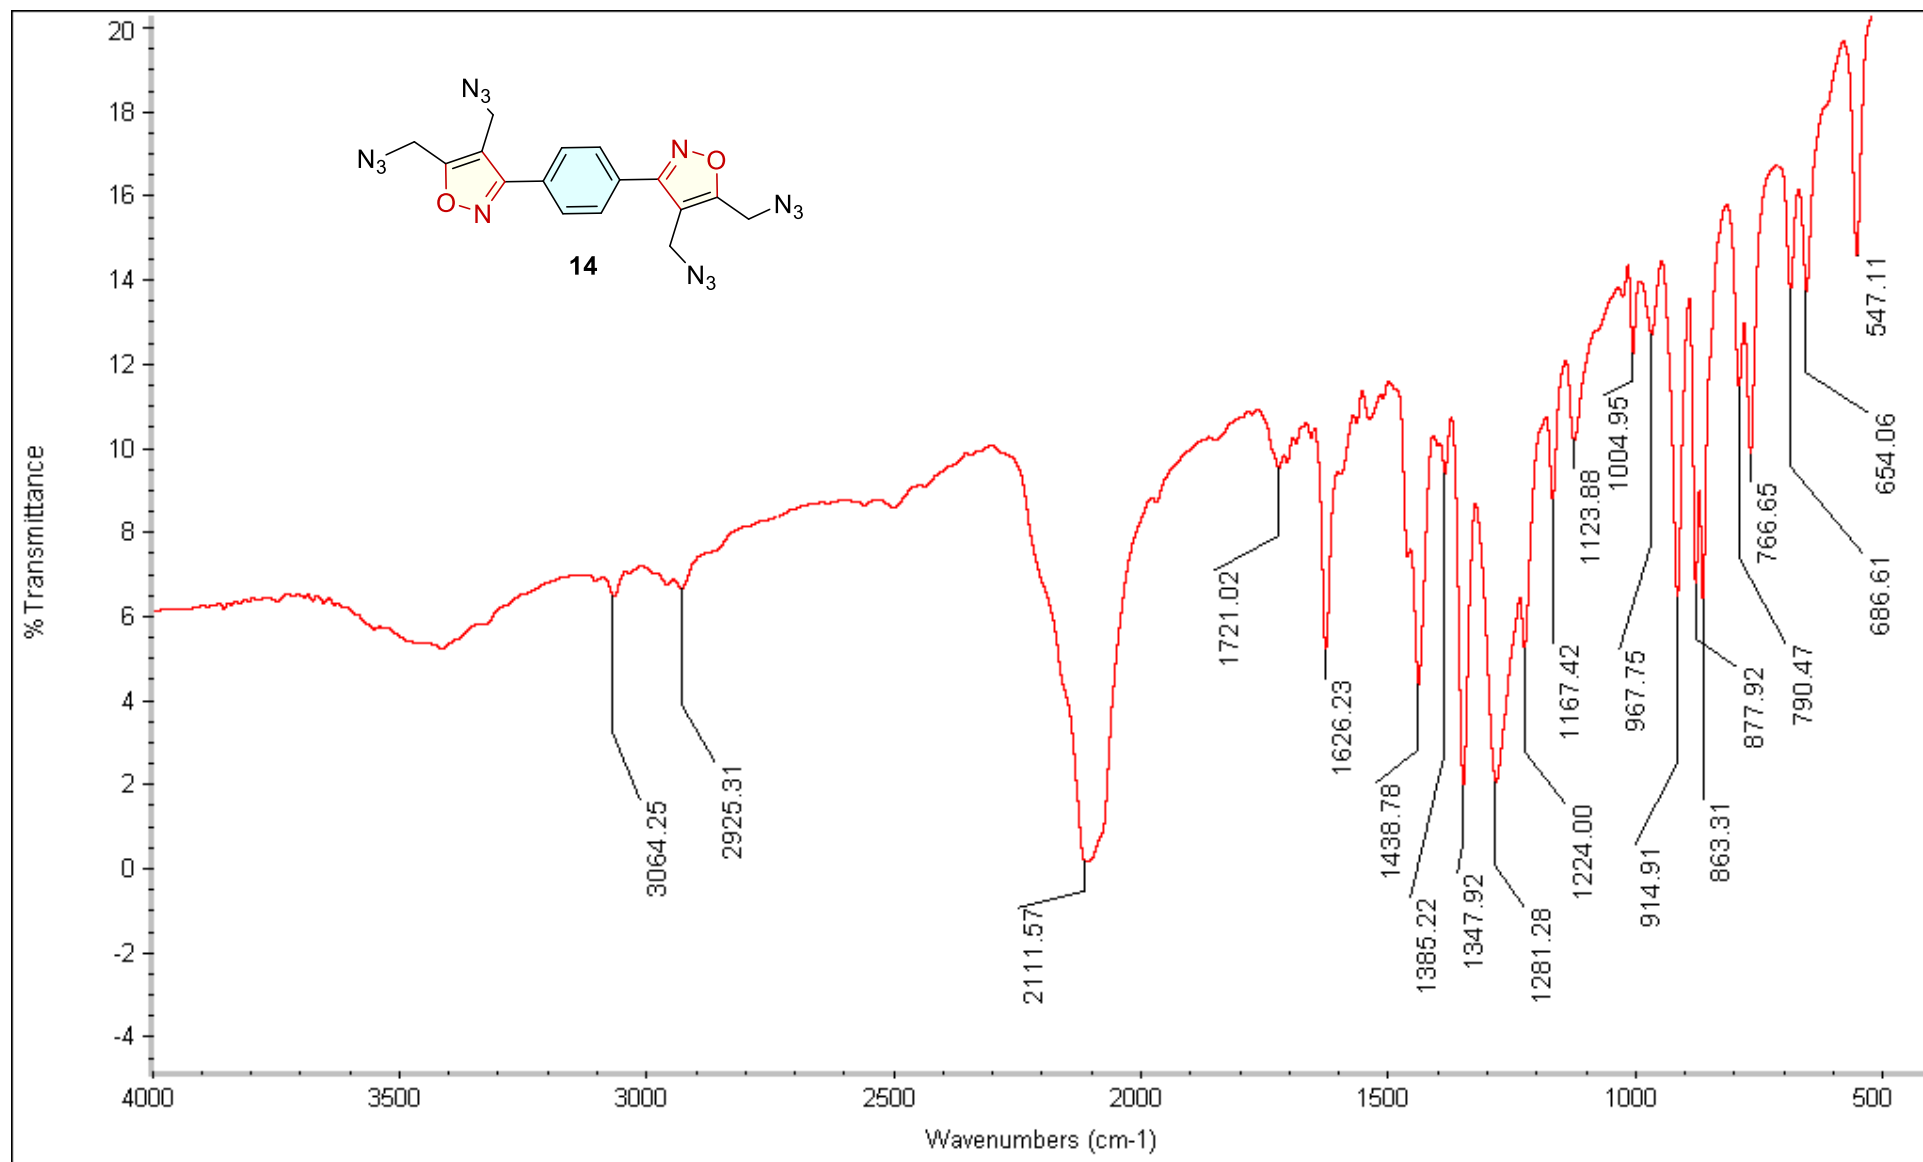

**Figure S61.** FTIR-Spectrum of Compound 14

Current Data Parameters  
NAME 1H  
EXPNO 358  
PROCNO 1

F2 - Acquisition Parameters  
Date\_ 20220824  
Time\_ 12.25  
INSTRUM spect  
PROBHD 5 mm QNP 1H/13  
PULPROG zg  
TD 32768  
SOLVENT DMSO  
NS 6  
DS 0  
SWH 7485.030 Hz  
FIDRES 0.228425 Hz  
AQ 2.1889024 sec  
RG 80.6  
DW 66.800 usec  
DE 6.00 usec  
TE 300.0 K  
D1 1.00000000 sec

===== CHANNEL f1 =====  
NUC1 1H  
P1 3.00 usec  
PL1 -4.00 dB  
SFO1 300.1330013 MHz

F2 - Processing parameters  
SI 32768  
SF 300.1300033 MHz  
WDW EM  
SSB 0  
LB 0.10 Hz  
GB 0  
PC 1.00

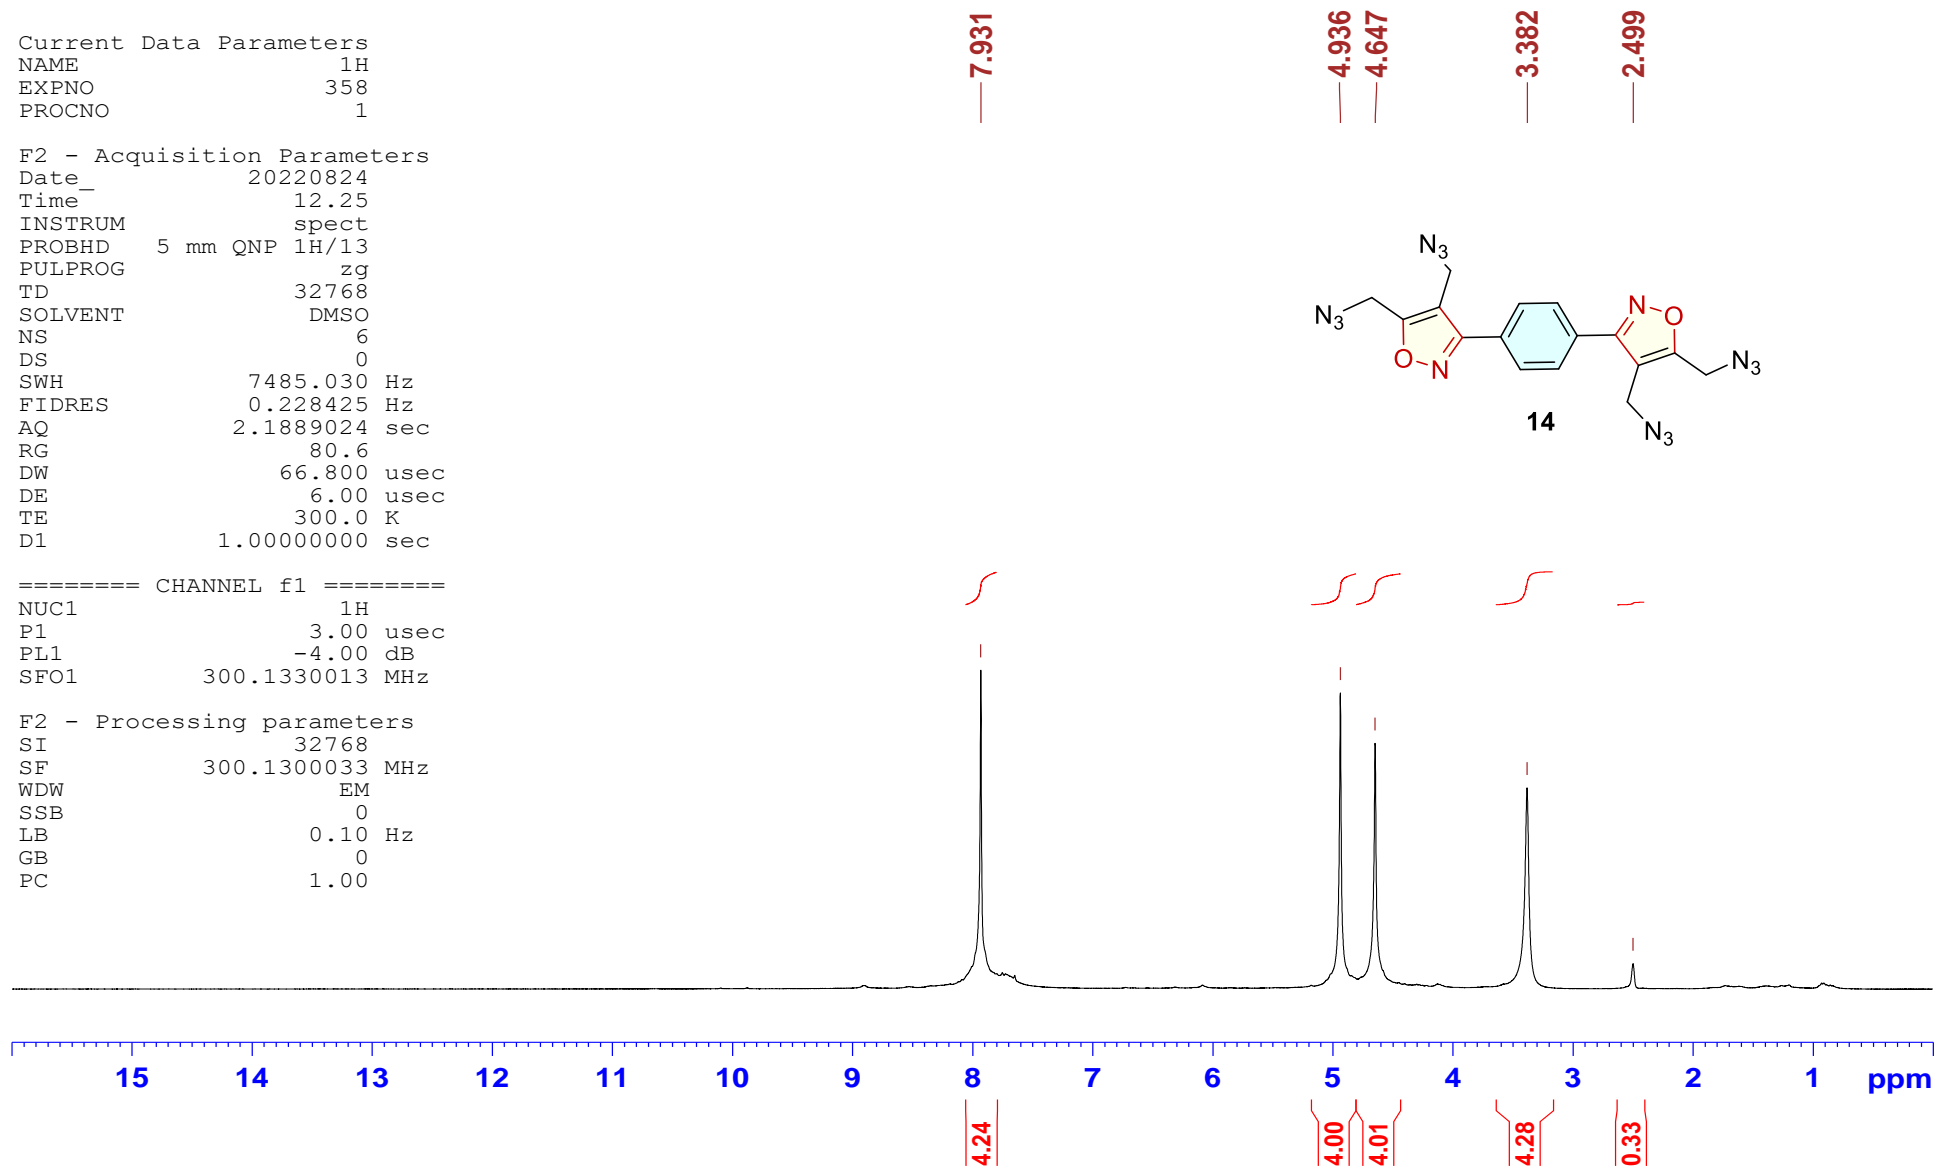

Figure S62. <sup>1</sup>H NMR Spectrum of Compound 14



Current Data Parameters  
NAME 13C  
EXPNO 357  
PROCNO 1

F2 - Acquisition Parameters  
Date\_ 20220824  
Time\_ 12.27  
INSTRUM spect  
PROBHD 5 mm QNP 1H/13  
PULPROG zgpg  
TD 32768  
SOLVENT DMSO  
NS 412  
DS 0  
SWH 19960.080 Hz  
FIDRES 0.609133 Hz  
AQ 0.8208384 sec  
RG 20642.5  
DW 25.050 usec  
DE 6.00 usec  
TE 300.0 K  
D1 1.00000000 sec  
d11 0.03000000 sec  
d12 0.00002000 sec

=====  
CHANNEL f1  
NUC1 13C  
P1 4.00 usec  
PL1 -5.00 dB  
SFO1 75.4760505 MHz

=====  
CHANNEL f2  
CPDPRG[2] waltz16  
NUC2 1H  
PCPD2 100.00 usec  
PL2 120.00 dB  
PL12 17.00 dB  
PL13 17.00 dB  
SFO2 300.1312005 MHz

F2 - Processing parameters  
SI 32768  
SF 75.4677853 MHz  
WDW EM  
SSB 0  
LB 0.50 Hz  
GB 0  
PC 1.40

166.81  
161.28

129.56  
128.65

111.15

42.92  
41.65  
40.34  
40.07  
39.79  
39.51  
39.23  
38.95  
38.68

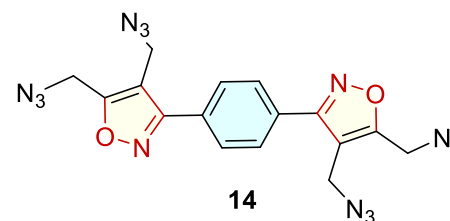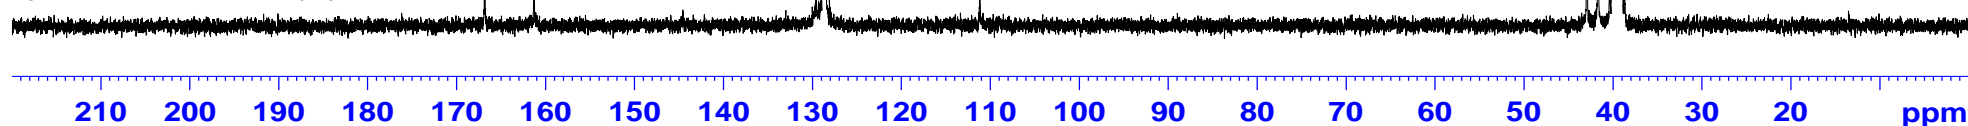

Figure S63. <sup>13</sup>C NMR Spectrum of Compound 14

Current Data Parameters  
NAME DEPT135  
EXPNO 107  
PROCNO 1

F2 - Acquisition Parameters  
Date\_ 20220824  
Time\_ 12.41  
INSTRUM spect  
PROBHD 5 mm QNP 1H/13  
PULPROG dept135  
TD 32768  
SOLVENT DMSO  
NS 86  
DS 16  
SWH 19960.080 Hz  
FIDRES 0.609133 Hz  
AQ 0.8208384 sec  
RG 18390.4  
DW 25.050 usec  
DE 6.00 usec  
TE 300.0 K  
CNST2 140.0000000  
D1 2.00000000 sec  
d2 0.00357143 sec  
d12 0.00002000 sec  
DELTA 0.00000891 sec

==== CHANNEL f1 =====  
NUC1 13C  
P1 7.00 usec  
p2 14.00 usec  
PL1 -5.00 dB  
SFO1 125.760309 MHz

==== CHANNEL f2 =====  
CPDPRG[2] waltz16  
NUC2 1H  
P3 6.10 usec  
p4 12.20 usec  
PCPD2 100.00 usec  
PL2 -6.00 dB  
PL12 18.54 dB  
SFO2 300.1312005 MHz

F2 - Processing parameters  
SI 32768  
SF 75.4677851 MHz  
WDW EM  
SSB 0  
LB 1.00 Hz  
GB 0  
PC 1.40

128.65

42.91  
41.65

JMS-SOHAN-345-DEPT135

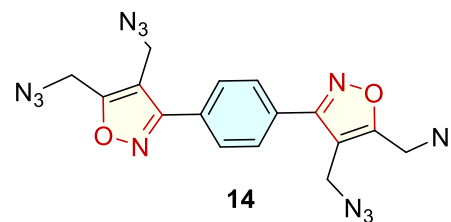

210 200 190 180 170 160 150 140 130 120 110 100 90 80 70 60 50 40 30 20 10 ppm

Figure S64. <sup>13</sup>C-DEPT135 NMR Spectrum of Compound 14

15N{1H}\_5880 Sohan 345

Current Data Parameters  
NAME New folder  
EXPNO 5880  
PROCNO 1

F2 - Acquisition Parameters  
Date\_ 20220922  
Time\_ 17.51  
INSTRUM spect  
PROBHD 5 mm PABBO BB/  
PULPROG zgig  
TD 32632  
SOLVENT DMSO  
NS 4611  
DS 0  
SWH 40760.871 Hz  
FIDRES 1.249107 Hz  
AQ 0.4002859 sec  
RG 27.83  
DW 12.267 usec  
DE 8.00 usec  
TE 303.2 K  
D1 12.00000000 sec  
D11 0.03000000 sec  
TD0 10240

==== CHANNEL f1 =====  
SFO1 50.6963210 MHz  
NUC1 15N  
P1 12.00 usec  
PLW1 155.00000000 W

==== CHANNEL f2 =====  
SFO2 500.1920008 MHz  
NUC2 1H  
CPDPRG[2] waltz16  
PCPD2 80.00 usec  
PLW2 26.00000000 W  
PLW12 0.27649999 W

F2 - Processing parameters  
SI 32768  
SF 50.7031345 MHz  
WDW EM  
SSB 0  
LB 5.00 Hz  
GB 0  
PC 0.20

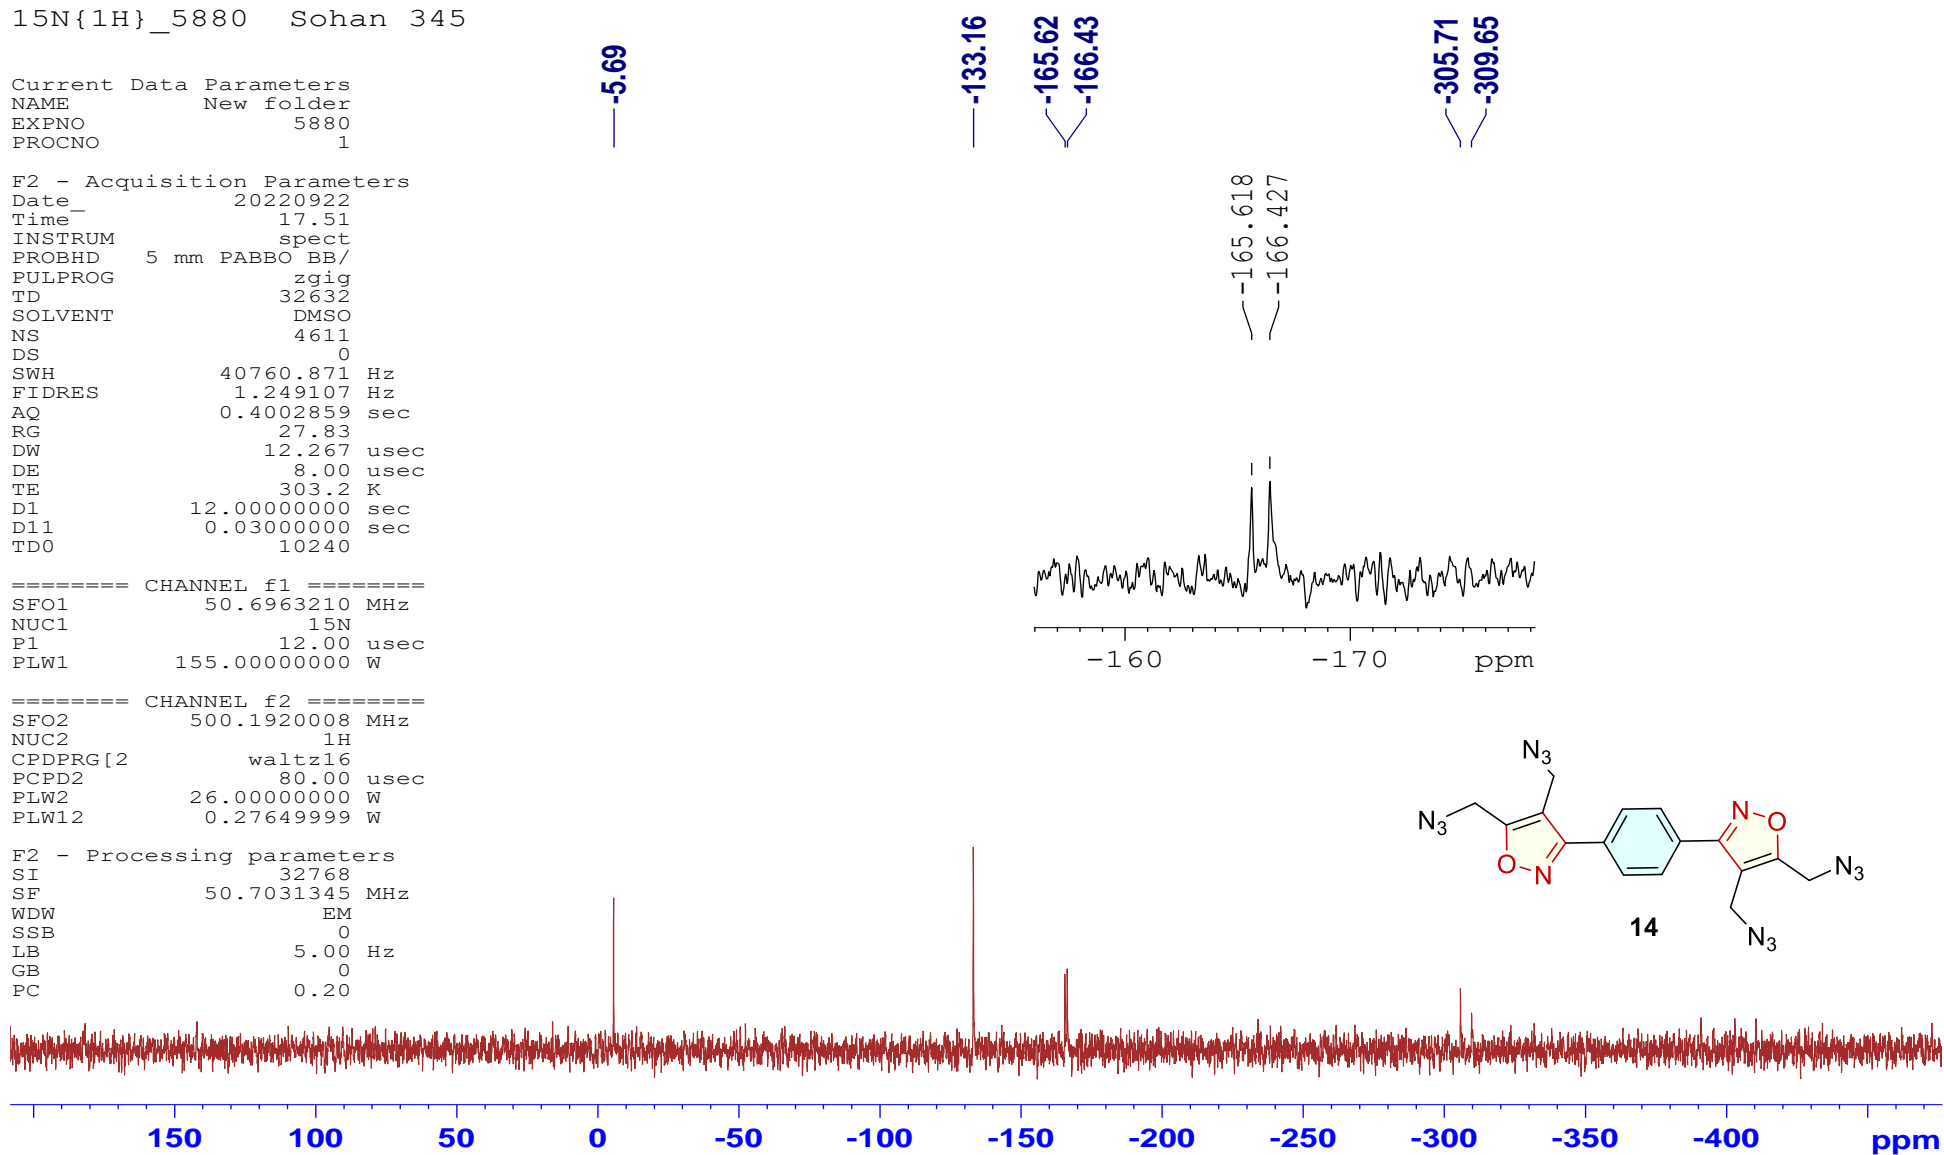

Figure S65. <sup>15</sup>N NMR Spectrum of Compound 14 in DMSO-d<sub>6</sub> (at 50.70 MHz)

Sample: SOHAN-345 at 5°C  
Size: 0.1000 mg  
Method: Ramp  
Comment: Cell constant calibration

DSC

File: C:\DSC\SOHAN\SOHAN-345 at 5°C.001  
Operator: SOHAN  
Run Date: 08-Sep-2022 10:35  
Instrument: DSC Q2000 V24.11 Build 124

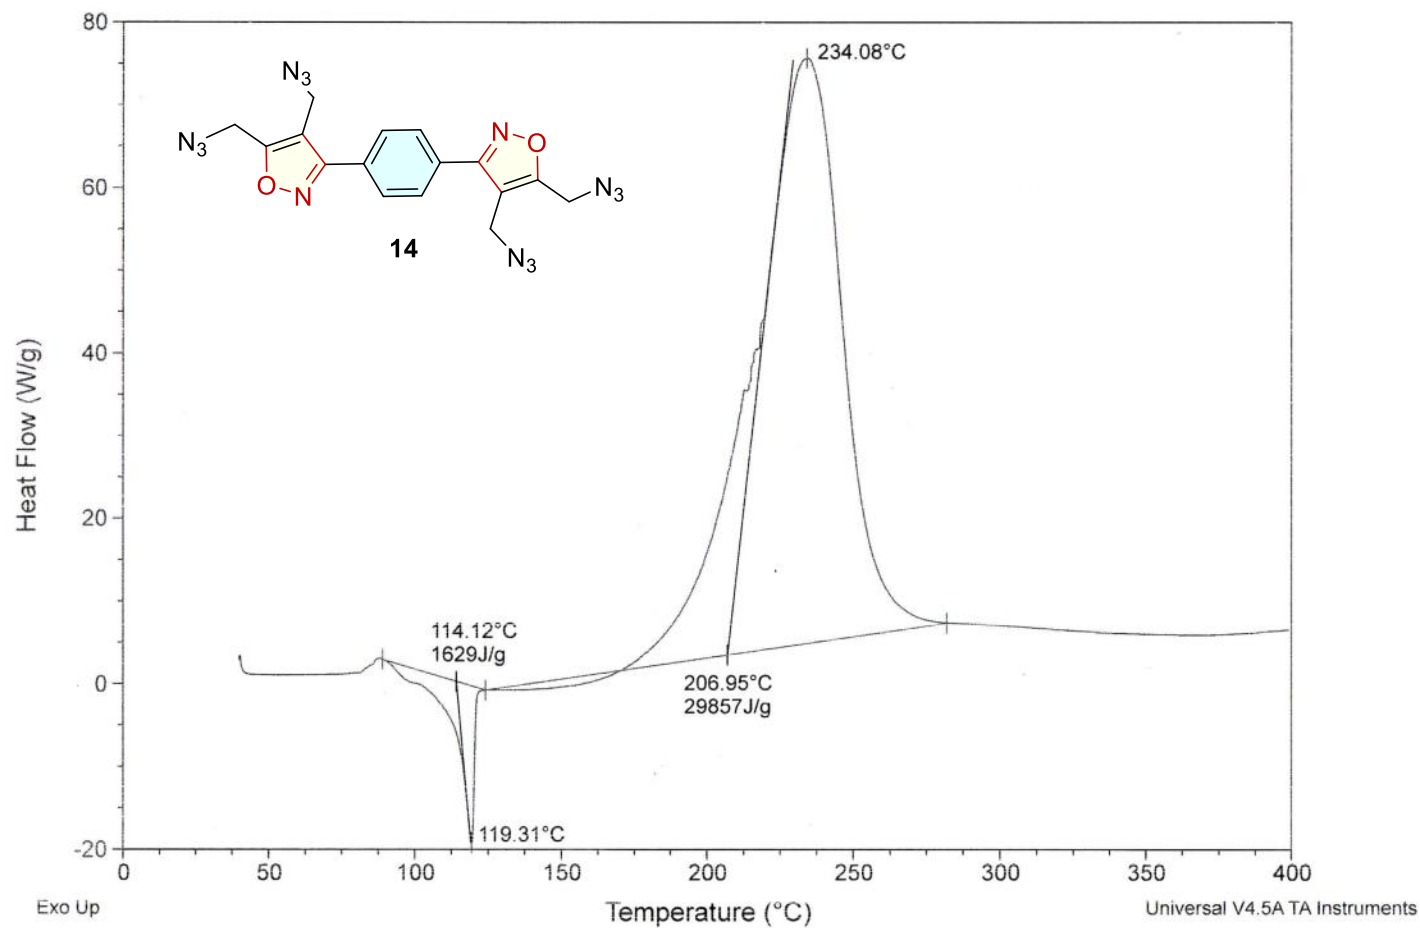

Figure S66. DSC of compound 14 at 5 °C min<sup>-1</sup>

Sample: SOHAN-345 at 5°C  
Size: 2.6230 mg  
Method: Ramp

### TGA

File: C:\...TGA\Sohan\SOHAN-345 at 5°C.001  
Operator: SOHAN  
Run Date: 08-Sep-2022 10:55  
Instrument: TGA Q50 V20.13 Build 39

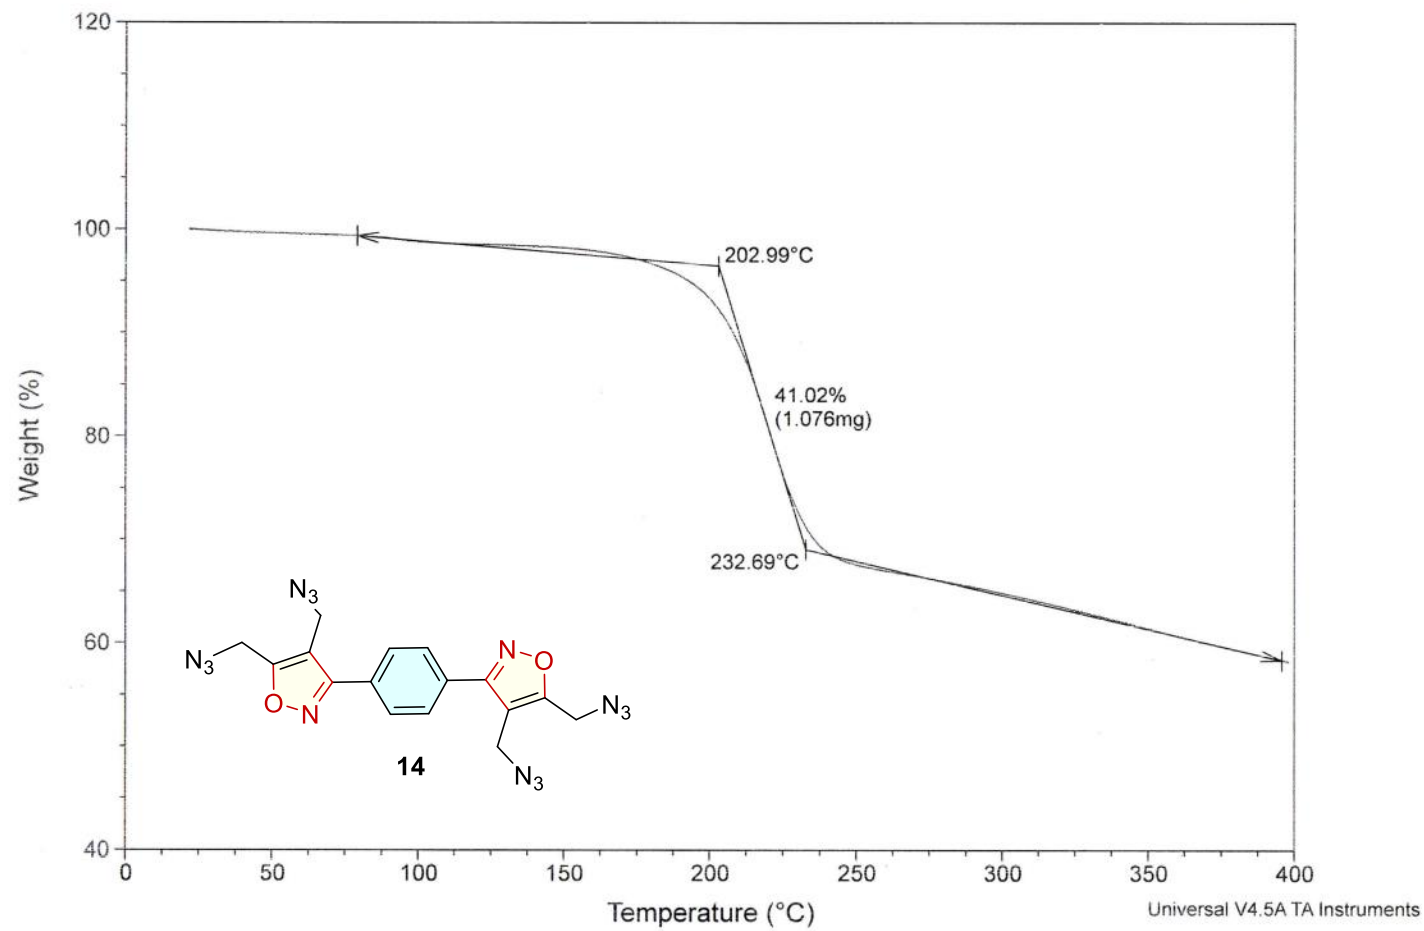

Figure S67. TGA of compound 14 at 5 °C min<sup>-1</sup>

**Table S12.** Cartesian coordinates (in Å) for the optimized structure of compound **4** obtained using the B3LYP/6-311++G(d,p) level of theory

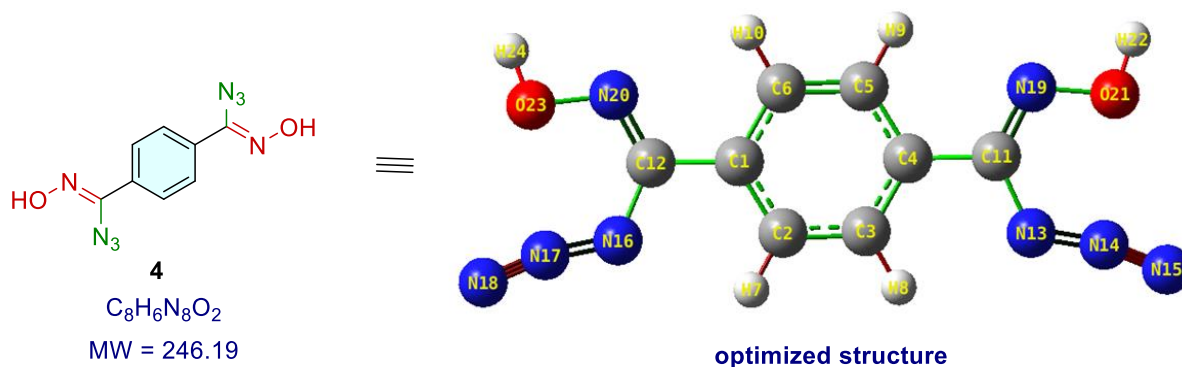

| Center Number | Atomic Symbol | Coordinates (Angstroms) |           |           |
|---------------|---------------|-------------------------|-----------|-----------|
|               |               | X                       | Y         | Z         |
| 1             | C             | 1.719694                | 3.543572  | -0.265989 |
| 2             | C             | 3.093502                | 3.299594  | -0.186882 |
| 3             | C             | 3.995430                | 4.352361  | -0.060970 |
| 4             | C             | 3.545175                | 5.674430  | -0.011194 |
| 5             | C             | 2.163550                | 5.919163  | -0.090135 |
| 6             | C             | 1.267406                | 4.873097  | -0.215286 |
| 7             | H             | 3.459905                | 2.282452  | -0.224399 |
| 8             | H             | 5.055446                | 4.144887  | -0.001218 |
| 9             | H             | 1.803747                | 6.938652  | -0.051728 |
| 10            | H             | 0.206005                | 5.073278  | -0.275367 |
| 11            | C             | 4.501516                | 6.799017  | 0.121988  |
| 12            | C             | 0.755662                | 2.425841  | -0.401359 |
| 13            | N             | 5.842076                | 6.391216  | 0.187347  |
| 14            | N             | 6.800185                | 7.169294  | 0.301698  |
| 15            | N             | 7.803309                | 7.675461  | 0.402485  |
| 16            | N             | 1.362589                | 1.161461  | -0.429865 |
| 17            | N             | 0.741208                | 0.094811  | -0.542144 |
| 18            | N             | 0.394876                | -0.974965 | -0.632989 |
| 19            | N             | 4.031562                | 7.996691  | 0.163168  |
| 20            | N             | -0.497936               | 2.708238  | -0.477161 |
| 21            | O             | 5.036581                | 8.960175  | 0.289485  |
| 22            | H             | 4.548300                | 9.790057  | 0.306718  |
| 23            | O             | -1.295044               | 1.566544  | -0.601177 |
| 24            | H             | -2.188585               | 1.922802  | -0.646742 |

$E_0 = -896.756502$  Hartree/particle; ZPE = 0.157956 Hartree/particle.

Number of imaginary frequencies at the B3LYP/6-311++G(d,p) level = 0

**Table S13.** Cartesian coordinates (in Å) for the optimized structure of compound **4A** obtained using the B3LYP/6-311++G(d,p) level of theory

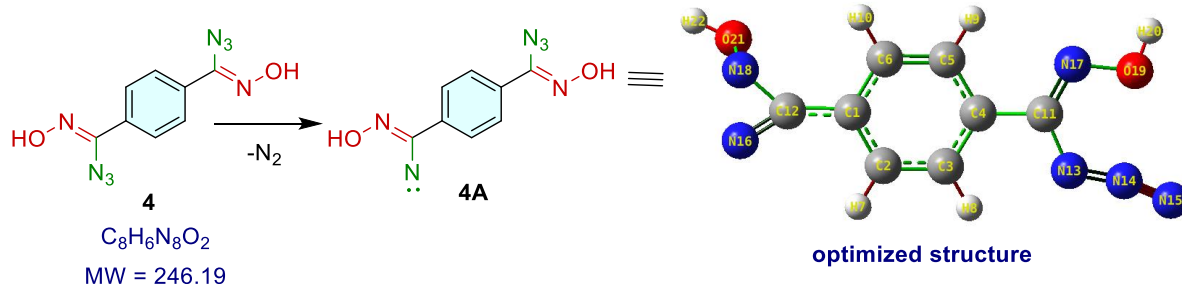

| Center Number | Atomic Symbol | Coordinates (Angstroms) |          |           |
|---------------|---------------|-------------------------|----------|-----------|
|               |               | X                       | Y        | Z         |
| 1             | C             | 1.761341                | 3.499892 | -0.038856 |
| 2             | C             | 3.141568                | 3.267616 | -0.060069 |
| 3             | C             | 4.024944                | 4.336864 | -0.016846 |
| 4             | C             | 3.544879                | 5.653233 | 0.046139  |
| 5             | C             | 2.159712                | 5.879256 | 0.065373  |
| 6             | C             | 1.275650                | 4.813447 | 0.023946  |
| 7             | H             | 3.515265                | 2.251652 | -0.109653 |
| 8             | H             | 5.091480                | 4.158107 | -0.032092 |
| 9             | H             | 1.789291                | 6.894256 | 0.111385  |
| 10            | H             | 0.206405                | 4.986896 | 0.034357  |
| 11            | C             | 4.489486                | 6.796957 | 0.091235  |
| 12            | C             | 0.835439                | 2.393127 | -0.072419 |
| 13            | N             | 5.836307                | 6.413795 | 0.050901  |
| 14            | N             | 6.784356                | 7.213856 | 0.077932  |
| 15            | N             | 7.780194                | 7.742157 | 0.089978  |
| 16            | N             | 0.699296                | 1.151112 | -0.153522 |
| 17            | N             | 3.997103                | 7.984013 | 0.161102  |
| 18            | N             | -0.551965               | 2.164738 | -0.059610 |
| 19            | O             | 4.983668                | 8.968910 | 0.196925  |
| 20            | H             | 4.481315                | 9.789359 | 0.247955  |
| 21            | O             | -1.035011               | 2.432808 | -1.387280 |
| 22            | H             | -1.902625               | 2.008835 | -1.385235 |

$E_0 = -787.214664$  Hartree/particle; ZPE = 0.146786 Hartree/particle.

Number of imaginary frequencies at the B3LYP/6-311++G(d,p) level = 0

**Table S14.** Cartesian coordinates (in Å) for the optimized structure of compound **5** obtained using the B3LYP/6-311++G(d,p) level of theory

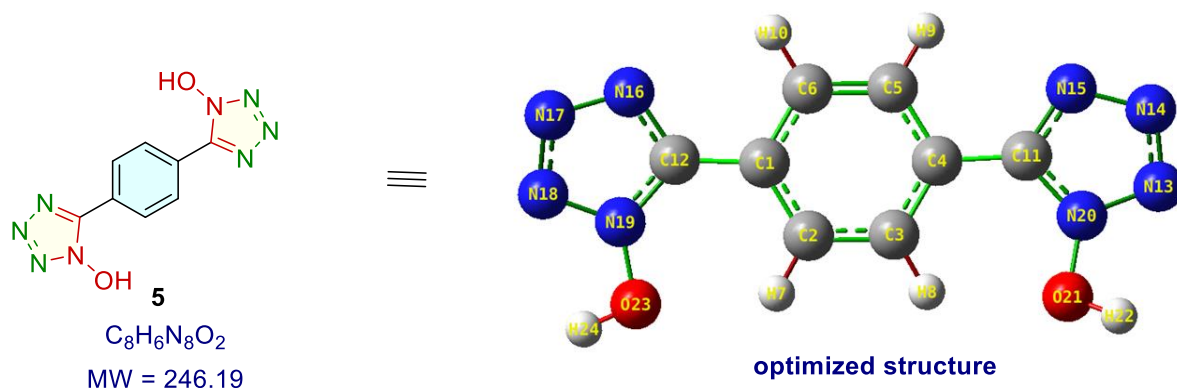

| Center Number | Atomic Symbol | Coordinates (Angstroms) |          |           |
|---------------|---------------|-------------------------|----------|-----------|
|               |               | X                       | Y        | Z         |
| 1             | C             | 1.262547                | 4.405405 | -0.547907 |
| 2             | C             | 2.385756                | 3.582238 | -0.398174 |
| 3             | C             | 3.587806                | 4.109076 | 0.060529  |
| 4             | C             | 3.689234                | 5.468631 | 0.381189  |
| 5             | C             | 2.562072                | 6.293799 | 0.229181  |
| 6             | C             | 1.365896                | 5.769545 | -0.226916 |
| 7             | H             | 2.330875                | 2.530077 | -0.638841 |
| 8             | H             | 4.442019                | 3.455457 | 0.165964  |
| 9             | H             | 2.641763                | 7.344808 | 0.474793  |
| 10            | H             | 0.497190                | 6.404739 | -0.341556 |
| 11            | C             | 4.923851                | 6.082732 | 0.864221  |
| 12            | C             | -0.028710               | 3.912623 | -1.021825 |
| 13            | N             | 6.988424                | 6.394798 | 1.593025  |
| 14            | N             | 6.373128                | 7.537160 | 1.530780  |
| 15            | N             | 5.115635                | 7.383548 | 1.083648  |
| 16            | N             | -1.149762               | 4.627764 | -1.119015 |
| 17            | N             | -2.106157               | 3.817513 | -1.601407 |
| 18            | N             | -1.643899               | 2.620355 | -1.803921 |
| 19            | N             | -0.357121               | 2.675212 | -1.452643 |
| 20            | N             | 6.093874                | 5.490097 | 1.188074  |
| 21            | O             | 6.424622                | 4.163134 | 1.119559  |
| 22            | H             | 7.215238                | 4.090929 | 1.679418  |
| 23            | O             | 0.435473                | 1.561308 | -1.530985 |
| 24            | H             | -0.071356               | 0.955451 | -2.096675 |

$E_0 = -896.758882$  Hartree/particle; ZPE = 0.160846 Hartree/particle.

Number of imaginary frequencies at the B3LYP/6-311++G(d,p) level = 0



**Table S15.** Cartesian coordinates (in Å) for the optimized structure of compound **5A** obtained using the B3LYP/6-311++G(d,p) level of theory

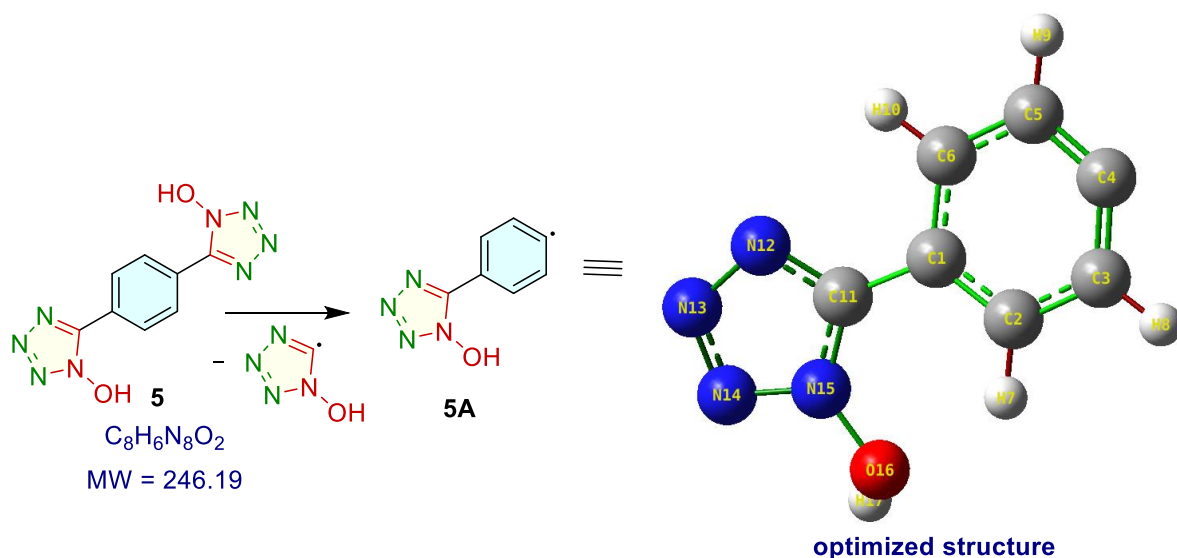

| Center Number | Atomic Symbol | Coordinates (Angstroms) |          |           |
|---------------|---------------|-------------------------|----------|-----------|
|               |               | X                       | Y        | Z         |
| 1             | C             | 1.240868                | 4.425749 | -0.524535 |
| 2             | C             | 2.295552                | 3.593036 | -0.119649 |
| 3             | C             | 3.492937                | 4.151683 | 0.342708  |
| 4             | C             | 3.567141                | 5.522514 | 0.376643  |
| 5             | C             | 2.569696                | 6.391967 | 0.000948  |
| 6             | C             | 1.379993                | 5.822839 | -0.457801 |
| 7             | H             | 2.189796                | 2.517164 | -0.155025 |
| 8             | H             | 4.311437                | 3.516118 | 0.660477  |
| 9             | H             | 2.684832                | 7.468507 | 0.052043  |
| 10            | H             | 0.553211                | 6.451017 | -0.766409 |
| 11            | C             | -0.037805               | 3.899608 | -1.003829 |
| 12            | N             | -1.161128               | 4.594956 | -1.149094 |
| 13            | N             | -2.097672               | 3.750727 | -1.631851 |
| 14            | N             | -1.622159               | 2.556297 | -1.777388 |
| 15            | N             | -0.336456               | 2.641149 | -1.404391 |
| 16            | O             | 0.467851                | 1.534032 | -1.396521 |
| 17            | H             | 0.332588                | 1.119476 | -2.263010 |

$E_0 = -563.806523$  Hartree/particle; ZPE = 0.117484 Hartree/particle.

Number of imaginary frequencies at the B3LYP/6-311++G(d,p) level = 0

**Table S16.** Cartesian coordinates (in Å) for the optimized structure of compound **5B** obtained using the B3LYP/6-311++G(d,p) level of theory

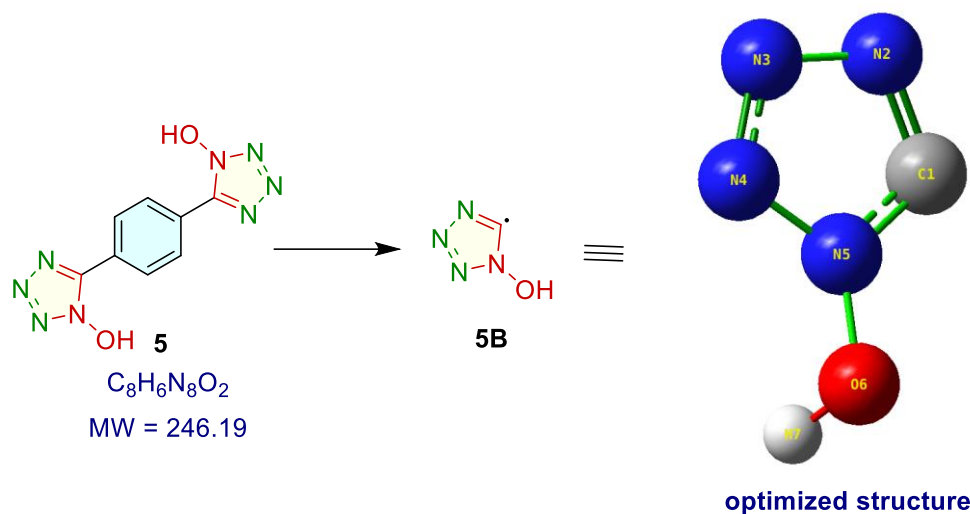

| Center Number | Atomic Symbol | Coordinates (Angstroms) |          |           |
|---------------|---------------|-------------------------|----------|-----------|
|               |               | X                       | Y        | Z         |
| 1             | C             | -0.018166               | 3.874794 | -1.367008 |
| 2             | N             | -0.950452               | 4.632538 | -1.805932 |
| 3             | N             | -2.028407               | 3.770184 | -2.021024 |
| 4             | N             | -1.722465               | 2.555702 | -1.700268 |
| 5             | N             | -0.437162               | 2.601093 | -1.302496 |
| 6             | O             | 0.210800                | 1.528291 | -0.769410 |
| 7             | H             | 0.369430                | 0.921107 | -1.508677 |

$E_0 = -332.757968$  Hartree/particle; ZPE = 0.036750 Hartree/particle.

Number of imaginary frequencies at the B3LYP/6-311++G(d,p) level = 0

**Table S14.** Cartesian coordinates (in Å) for the optimized structure of compound **5C** obtained using the B3LYP/6-311++G(d,p) level of theory

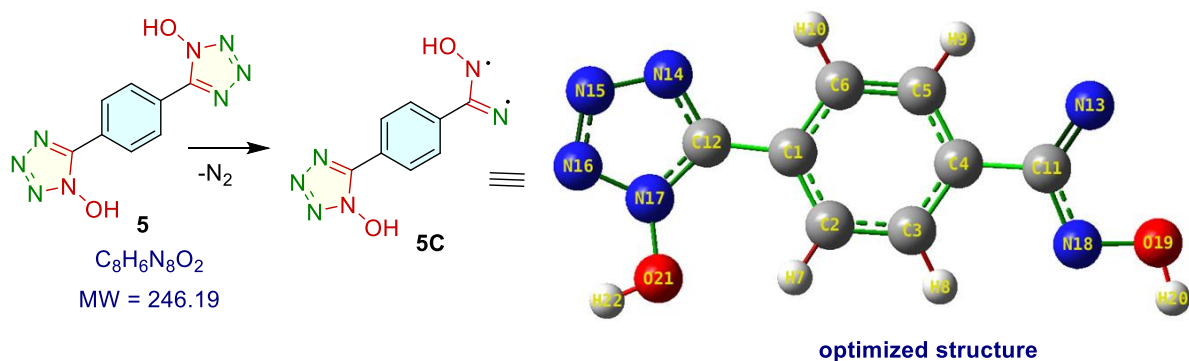

| Center Number | Atomic Symbol | Coordinates (Angstroms) |          |           |
|---------------|---------------|-------------------------|----------|-----------|
|               |               | X                       | Y        | Z         |
| 1             | C             | 1.201957                | 4.365221 | -0.571996 |
| 2             | C             | 2.226602                | 3.468572 | -0.239403 |
| 3             | C             | 3.447823                | 3.942087 | 0.226732  |
| 4             | C             | 3.667724                | 5.315209 | 0.368924  |
| 5             | C             | 2.642891                | 6.211866 | 0.038541  |

|    |   |           |          |           |
|----|---|-----------|----------|-----------|
| 6  | C | 1.423924  | 5.744061 | -0.425310 |
| 7  | H | 2.076340  | 2.402755 | -0.337828 |
| 8  | H | 4.232982  | 3.243033 | 0.482585  |
| 9  | H | 2.808623  | 7.277240 | 0.141092  |
| 10 | H | 0.632359  | 6.435399 | -0.683855 |
| 11 | C | 4.970501  | 5.835861 | 0.883071  |
| 12 | C | -0.104386 | 3.934386 | -1.065743 |
| 13 | N | 5.064921  | 7.010813 | 1.407190  |
| 14 | N | -1.142508 | 4.729391 | -1.326663 |
| 15 | N | -2.146122 | 3.953101 | -1.768512 |
| 16 | N | -1.794343 | 2.703064 | -1.788220 |
| 17 | N | -0.529031 | 2.686449 | -1.360849 |
| 18 | N | 6.034046  | 4.969365 | 0.755642  |
| 19 | O | 7.167561  | 5.517470 | 1.275153  |
| 20 | H | 7.838438  | 4.838214 | 1.124199  |
| 21 | O | 0.151607  | 1.503741 | -1.244292 |
| 22 | H | -0.361992 | 0.885676 | -1.789987 |

$E_0 = -787.209997$  Hartree/particle; ZPE = 0.147372 Hartree/particle.

Number of imaginary frequencies at the B3LYP/6-311++G(d,p) level = 0

**Table S17.** Cartesian coordinates (in Å) for the optimized structure of compound **12** obtained using the B3LYP/6-311++G(d,p) level of theory

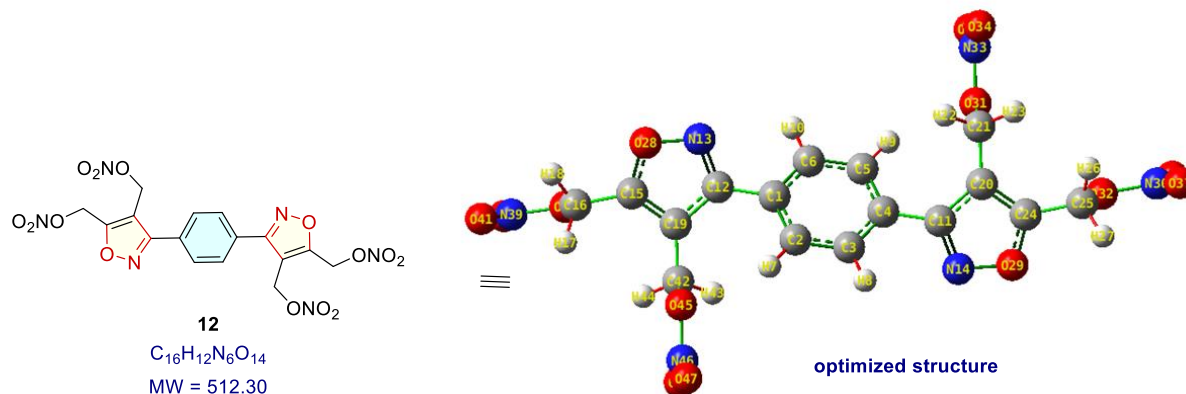

| Center Number | Atomic Symbol | Coordinates (Angstroms) |          |           |
|---------------|---------------|-------------------------|----------|-----------|
|               |               | X                       | Y        | Z         |
| 1             | C             | 1.826055                | 4.118684 | -0.465678 |
| 2             | C             | 2.989533                | 3.337694 | -0.481338 |
| 3             | C             | 4.222433                | 3.906135 | -0.186997 |
| 4             | C             | 4.319926                | 5.267005 | 0.130300  |
| 5             | C             | 3.156663                | 6.048358 | 0.144352  |
| 6             | C             | 1.923849                | 5.479880 | -0.150273 |
| 7             | H             | 2.927645                | 2.276245 | -0.687645 |
| 8             | H             | 5.116608                | 3.295531 | -0.189877 |
| 9             | H             | 3.218788                | 7.109847 | 0.349803  |
| 10            | H             | 1.030011                | 6.090940 | -0.149621 |
| 11            | C             | 5.638648                | 5.857312 | 0.425281  |
| 12            | C             | 0.506878                | 3.528051 | -0.756514 |

|    |   |           |           |           |
|----|---|-----------|-----------|-----------|
| 13 | N | -0.549310 | 3.933635  | -0.086259 |
| 14 | N | 6.696459  | 5.455619  | -0.243957 |
| 15 | C | -1.201972 | 2.402628  | -1.567711 |
| 16 | C | -2.233522 | 1.572988  | -2.245273 |
| 17 | H | -1.828733 | 0.608152  | -2.553472 |
| 18 | H | -3.086688 | 1.414593  | -1.585251 |
| 19 | C | 0.144777  | 2.536840  | -1.732915 |
| 20 | C | 5.998672  | 6.839314  | 1.412529  |
| 21 | C | 5.141430  | 7.508627  | 2.427087  |
| 22 | H | 4.359885  | 6.843062  | 2.797709  |
| 23 | H | 5.726904  | 7.868876  | 3.273386  |
| 24 | C | 7.347051  | 6.972448  | 1.253854  |
| 25 | C | 8.378350  | 7.800267  | 1.932932  |
| 26 | H | 8.110041  | 7.993286  | 2.972749  |
| 27 | H | 9.349797  | 7.306219  | 1.895004  |
| 28 | O | -1.630109 | 3.226262  | -0.598986 |
| 29 | O | 7.776222  | 6.157580  | 0.277837  |
| 30 | O | -2.642222 | 2.330471  | -3.415973 |
| 31 | O | 4.516619  | 8.647212  | 1.762834  |
| 32 | O | 8.430198  | 9.052016  | 1.200259  |
| 33 | N | 3.696996  | 9.442235  | 2.627006  |
| 34 | O | 3.657991  | 9.127487  | 3.791688  |
| 35 | O | 3.152930  | 10.336465 | 2.048201  |
| 36 | N | 9.415410  | 9.966929  | 1.702116  |
| 37 | O | 10.053800 | 9.610536  | 2.662455  |
| 38 | O | 9.456726  | 10.982632 | 1.075299  |
| 39 | N | -3.701599 | 1.709097  | -4.161402 |
| 40 | O | -4.020170 | 2.348193  | -5.119132 |
| 41 | O | -4.119533 | 0.657518  | -3.744192 |
| 42 | C | 0.993483  | 1.860570  | -2.750565 |
| 43 | H | 1.783705  | 2.517237  | -3.117437 |
| 44 | H | 0.405012  | 1.512729  | -3.599482 |
| 45 | O | 1.600289  | 0.710146  | -2.084817 |
| 46 | N | 2.439875  | -0.077576 | -2.937240 |
| 47 | O | 2.951780  | -0.991397 | -2.358077 |
| 48 | O | 2.524145  | 0.260628  | -4.092007 |

$E_0 = -1998.131739$  Hartree/particle; ZPE = 0.316338 Hartree/particle.

Number of imaginary frequencies at the B3LYP/6-311++G(d,p) level = 0

**Table S18.** Cartesian coordinates (in Å) for the optimized structure of compound **12A** obtained using the B3LYP/6-311++G(d,p) level of theory

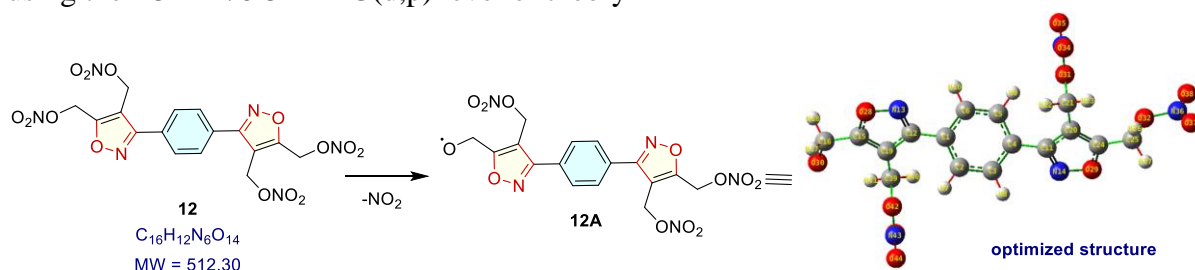

| Center Number | Atomic Symbol | Coordinates (Angstroms) |           |           |
|---------------|---------------|-------------------------|-----------|-----------|
|               |               | X                       | Y         | Z         |
| 1             | C             | 1.735682                | 4.217984  | -0.417912 |
| 2             | C             | 2.894456                | 3.439957  | -0.543627 |
| 3             | C             | 4.143671                | 3.991258  | -0.287683 |
| 4             | C             | 4.263279                | 5.331611  | 0.101159  |
| 5             | C             | 3.104824                | 6.110161  | 0.226043  |
| 6             | C             | 1.855820                | 5.558745  | -0.030706 |
| 7             | H             | 2.817986                | 2.392297  | -0.807258 |
| 8             | H             | 5.034267                | 3.381856  | -0.376785 |
| 9             | H             | 3.180930                | 7.158155  | 0.488486  |
| 10            | H             | 0.965172                | 6.168185  | 0.056837  |
| 11            | C             | 5.598152                | 5.903989  | 0.355612  |
| 12            | C             | 0.399717                | 3.643722  | -0.666176 |
| 13            | N             | -0.607037               | 3.998997  | 0.098076  |
| 14            | N             | 6.615676                | 5.545811  | -0.395713 |
| 15            | C             | -1.353430               | 2.570057  | -1.451620 |
| 16            | C             | -2.461412               | 1.774950  | -2.085333 |
| 17            | H             | -2.807659               | 0.985456  | -1.385083 |
| 18            | H             | -3.366117               | 2.404559  | -2.196392 |
| 19            | C             | -0.018840               | 2.722100  | -1.691362 |
| 20            | C             | 6.016036                | 6.822458  | 1.380716  |
| 21            | C             | 5.218714                | 7.424814  | 2.482136  |
| 22            | H             | 4.455273                | 6.737328  | 2.850343  |
| 23            | H             | 5.850910                | 7.728442  | 3.317003  |
| 24            | C             | 7.353808                | 6.965859  | 1.155668  |
| 25            | C             | 8.423639                | 7.749242  | 1.827392  |
| 26            | H             | 8.204564                | 7.891356  | 2.886757  |
| 27            | H             | 9.387358                | 7.250231  | 1.720062  |
| 28            | O             | -1.721131               | 3.318726  | -0.401200 |
| 29            | O             | 7.725468                | 6.214209  | 0.108151  |
| 30            | O             | -2.180135               | 1.178463  | -3.269063 |
| 31            | O             | 4.563970                | 8.605430  | 1.928747  |
| 32            | O             | 8.455726                | 9.036482  | 1.157241  |
| 33            | N             | 3.792343                | 9.340258  | 2.884202  |
| 34            | O             | 3.813335                | 8.950256  | 4.026457  |
| 35            | O             | 3.220255                | 10.269857 | 2.394498  |
| 36            | N             | 9.475282                | 9.914132  | 1.655306  |
| 37            | O             | 10.154919               | 9.503206  | 2.564308  |
| 38            | O             | 9.499787                | 10.959897 | 1.078750  |
| 39            | C             | 0.791285                | 2.121782  | -2.786471 |
| 40            | H             | 1.581154                | 2.796714  | -3.119291 |
| 41            | H             | 0.169808                | 1.834817  | -3.630774 |
| 42            | O             | 1.408831                | 0.918746  | -2.222732 |
| 43            | N             | 2.186601                | 0.174006  | -3.157621 |
| 44            | O             | 2.684230                | -0.801057 | -2.669147 |
| 45            | O             | 2.252529                | 0.597078  | -4.285855 |

$E_0 = -1792.955713$  Hartree/particle; ZPE = 0.299583 Hartree/particle.

Number of imaginary frequencies at the B3LYP/6-311++G(d,p) level = 0

**Table S19.** Cartesian coordinates (in Å) for the optimized structure of compound **14** obtained using the B3LYP/6-311++G(d,p) level of theory

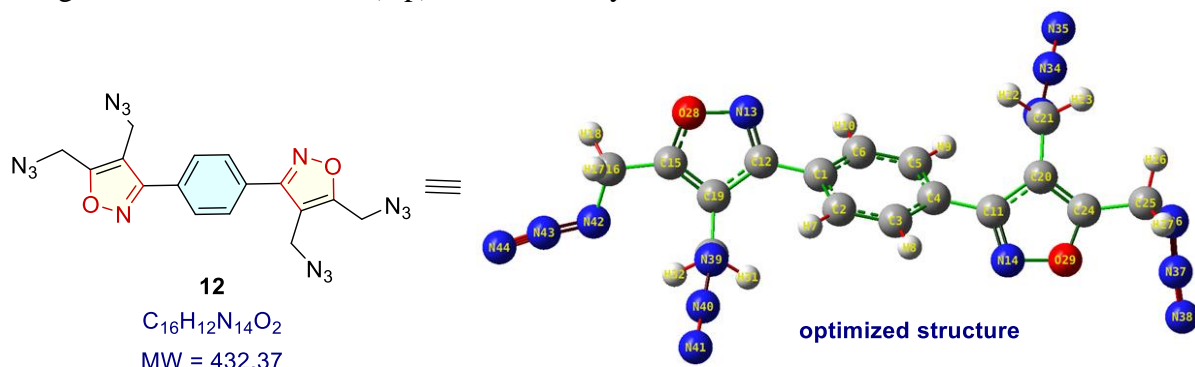

| Center Number | Atomic Symbol | Coordinates (Angstroms) |           |           |
|---------------|---------------|-------------------------|-----------|-----------|
|               |               | X                       | Y         | Z         |
| 1             | C             | 1.765621                | 4.329901  | -0.442053 |
| 2             | C             | 2.907838                | 3.517601  | -0.461767 |
| 3             | C             | 4.153665                | 4.047849  | -0.154124 |
| 4             | C             | 4.289719                | 5.401251  | 0.181468  |
| 5             | C             | 3.147643                | 6.213434  | 0.200982  |
| 6             | C             | 1.901712                | 5.682778  | -0.106520 |
| 7             | H             | 2.815514                | 2.461253  | -0.685186 |
| 8             | H             | 5.032075                | 3.415059  | -0.163021 |
| 9             | H             | 3.239763                | 7.269859  | 0.423172  |
| 10            | H             | 1.023350                | 6.315681  | -0.098619 |
| 11            | C             | 5.624089                | 5.949635  | 0.487129  |
| 12            | C             | 0.432597                | 3.778434  | -0.746717 |
| 13            | N             | -0.619273               | 4.231642  | -0.100689 |
| 14            | N             | 6.676982                | 5.475847  | -0.141785 |
| 15            | C             | -1.289147               | 2.691737  | -1.570386 |
| 16            | C             | -2.352293               | 1.850577  | -2.198082 |
| 17            | H             | -2.287123               | 0.825374  | -1.812736 |
| 18            | H             | -3.326014               | 2.261068  | -1.912103 |
| 19            | C             | 0.062364                | 2.780304  | -1.712720 |
| 20            | C             | 6.001166                | 6.953906  | 1.445814  |
| 21            | C             | 5.142195                | 7.712558  | 2.401862  |
| 22            | H             | 4.341889                | 7.066481  | 2.778884  |
| 23            | H             | 5.738723                | 8.039439  | 3.259864  |
| 24            | C             | 7.355958                | 7.023522  | 1.317762  |
| 25            | C             | 8.414140                | 7.854849  | 1.966507  |
| 26            | H             | 8.070577                | 8.192540  | 2.942754  |
| 27            | H             | 9.313545                | 7.247403  | 2.110767  |
| 28            | O             | -1.711544               | 3.547384  | -0.624056 |
| 29            | O             | 7.774440                | 6.151538  | 0.382192  |
| 30            | C             | 0.924139                | 2.046640  | -2.686507 |
| 31            | H             | 1.755195                | 2.684700  | -3.004467 |
| 32            | H             | 0.334541                | 1.785069  | -3.568280 |
| 33            | N             | 4.543705                | 8.899461  | 1.726809  |
| 34            | N             | 3.976584                | 9.695037  | 2.477875  |
| 35            | N             | 3.437737                | 10.499368 | 3.068443  |

|    |   |           |           |           |
|----|---|-----------|-----------|-----------|
| 36 | N | 8.727785  | 9.094989  | 1.215783  |
| 37 | N | 9.402729  | 8.947197  | 0.192036  |
| 38 | N | 10.018913 | 8.958789  | -0.758161 |
| 39 | N | 1.465427  | 0.807195  | -2.050531 |
| 40 | N | 2.060969  | 0.046335  | -2.815490 |
| 41 | N | 2.621649  | -0.730965 | -3.422150 |
| 42 | N | -2.183913 | 1.856890  | -3.668981 |
| 43 | N | -2.969731 | 1.138097  | -4.290346 |
| 44 | N | -3.633428 | 0.521832  | -4.971190 |

$E_0 = -1533.563301$  Hartree/particle; ZPE = 0.303009 Hartree/particle.

Number of imaginary frequencies at the B3LYP/6-311++G(d,p) level = 0

**Table S20.** Cartesian coordinates (in Å) for the optimized structure of compound **14** obtained using the B3LYP/6-311++G(d,p) level of theory

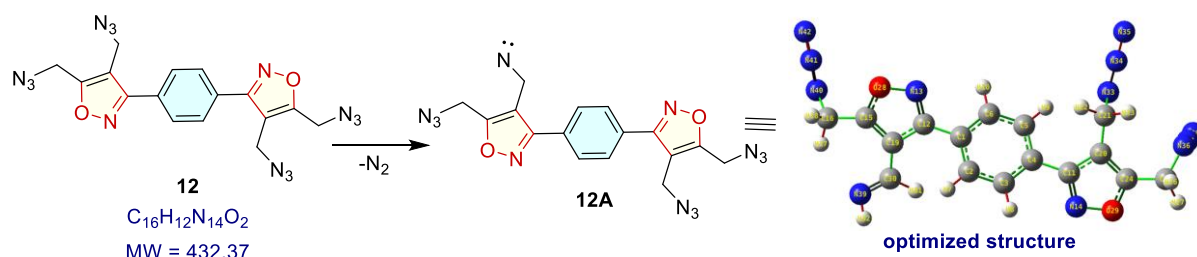

| Center Number | Atomic Symbol | Coordinates (Angstroms) |          |           |
|---------------|---------------|-------------------------|----------|-----------|
|               |               | X                       | Y        | Z         |
| 1             | C             | 1.980601                | 4.161155 | -0.647610 |
| 2             | C             | 3.079640                | 3.321163 | -0.421886 |
| 3             | C             | 4.302162                | 3.847134 | -0.027906 |
| 4             | C             | 4.457684                | 5.228260 | 0.150824  |
| 5             | C             | 3.359730                | 6.069109 | -0.074336 |
| 6             | C             | 2.136171                | 5.540508 | -0.466202 |
| 7             | H             | 2.970314                | 2.247611 | -0.519744 |
| 8             | H             | 5.145219                | 3.192747 | 0.153611  |
| 9             | H             | 3.472440                | 7.142081 | 0.024763  |
| 10            | H             | 1.292368                | 6.194876 | -0.644813 |
| 11            | C             | 5.768888                | 5.770872 | 0.552415  |
| 12            | C             | 0.669024                | 3.612928 | -1.041532 |
| 13            | N             | -0.423175               | 4.120338 | -0.519364 |
| 14            | N             | 6.866175                | 5.178244 | 0.136194  |
| 15            | C             | -1.003694               | 2.484648 | -1.932479 |
| 16            | C             | -1.999740               | 1.635575 | -2.655254 |
| 17            | H             | -1.452808               | 1.004201 | -3.351711 |
| 18            | H             | -2.519948               | 0.989040 | -1.938323 |
| 19            | C             | 0.365484                | 2.550204 | -1.965010 |
| 20            | C             | 6.070473                | 6.889079 | 1.405772  |
| 21            | C             | 5.137661                | 7.794901 | 2.141583  |
| 22            | H             | 4.265979                | 7.229149 | 2.488110  |
| 23            | H             | 5.642461                | 8.217705 | 3.013574  |
| 24            | C             | 7.432517                | 6.898216 | 1.441961  |

|    |   |           |           |           |
|----|---|-----------|-----------|-----------|
| 25 | C | 8.452385  | 7.752197  | 2.138206  |
| 26 | H | 8.588341  | 7.413720  | 3.166987  |
| 27 | H | 9.412395  | 7.633591  | 1.624796  |
| 28 | O | -1.481665 | 3.403895  | -1.084707 |
| 29 | O | 7.922086  | 5.893568  | 0.695212  |
| 30 | C | 1.285673  | 1.794793  | -2.813881 |
| 31 | H | 2.295509  | 2.212687  | -2.884365 |
| 32 | H | 1.687188  | 0.376667  | -4.004378 |
| 33 | N | 4.687254  | 8.899357  | 1.244851  |
| 34 | N | 4.061656  | 9.801744  | 1.805734  |
| 35 | N | 3.484335  | 10.689247 | 2.211137  |
| 36 | N | 8.058467  | 9.170280  | 2.247124  |
| 37 | N | 8.103573  | 9.819558  | 1.195292  |
| 38 | N | 8.108681  | 10.527447 | 0.312925  |
| 39 | N | 0.923284  | 0.741890  | -3.435966 |
| 40 | N | -2.961785 | 2.433552  | -3.446476 |
| 41 | N | -3.932675 | 2.885446  | -2.833718 |
| 42 | N | -4.874719 | 3.346275  | -2.404751 |

$E_0 = -1424.100658$  Hartree/particle; ZPE = 0.293828 Hartree/particle.

Number of imaginary frequencies at the B3LYP/6-311++G(d,p) level = 0

**Table S21.** Cartesian coordinates (in Å) for the optimized structure of compound TNT obtained using the B3LYP/6-311++G(d,p) level of theory

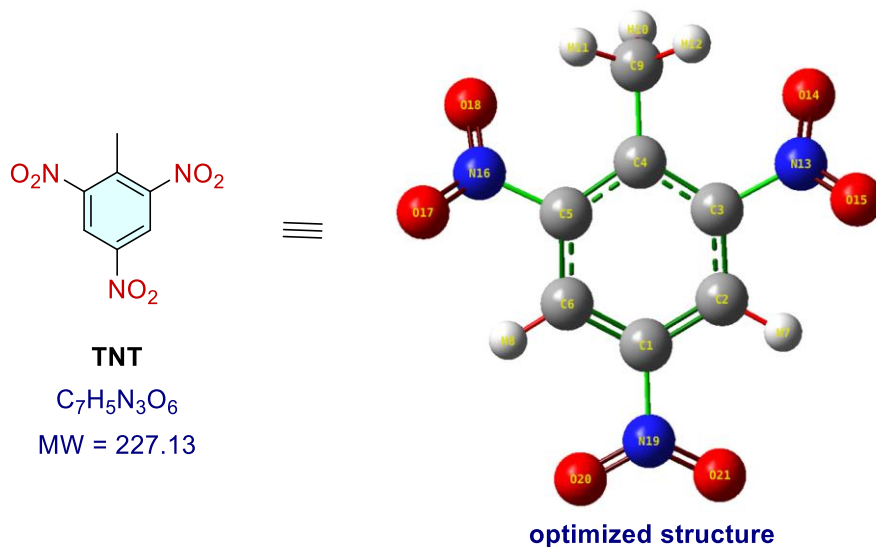

| Center Number | Atomic Symbol | Coordinates (Angstroms) |          |           |
|---------------|---------------|-------------------------|----------|-----------|
|               |               | X                       | Y        | Z         |
| 1             | C             | 1.597261                | 4.608254 | -0.850586 |
| 2             | C             | 2.657772                | 3.781366 | -0.520382 |
| 3             | C             | 3.551130                | 4.220788 | 0.445588  |
| 4             | C             | 3.437258                | 5.444490 | 1.129105  |
| 5             | C             | 2.329845                | 6.217375 | 0.737487  |
| 6             | C             | 1.406789                | 5.826941 | -0.221553 |
| 7             | H             | 2.783498                | 2.820556 | -0.999509 |
| 8             | H             | 0.561655                | 6.454127 | -0.468170 |
| 9             | C             | 4.373170                | 5.854860 | 2.235370  |



|    |   |           |          |           |
|----|---|-----------|----------|-----------|
| 10 | H | 5.209381  | 6.429721 | 1.831596  |
| 11 | H | 3.865132  | 6.482326 | 2.964868  |
| 12 | H | 4.786447  | 4.984463 | 2.740763  |
| 13 | N | 4.682632  | 3.301131 | 0.729155  |
| 14 | O | 5.787103  | 3.800233 | 0.881851  |
| 15 | O | 4.429510  | 2.106955 | 0.762326  |
| 16 | N | 2.083680  | 7.547550 | 1.350937  |
| 17 | O | 0.923199  | 7.835382 | 1.599371  |
| 18 | O | 3.052508  | 8.267559 | 1.538711  |
| 19 | N | 0.637246  | 4.174154 | -1.893531 |
| 20 | O | -0.285036 | 4.931852 | -2.152145 |
| 21 | O | 0.837781  | 3.090177 | -2.419191 |

$E_0 = -885.154386$  Hartree/particle; ZPE = 0.134371 Hartree/particle.

Number of imaginary frequencies at the B3LYP/6-311++G(d,p) level = 0

**Table S22.** Cartesian coordinates (in Å) for the optimized structure of compound TNT-A obtained using the B3LYP/6-311++G(d,p) level of theory

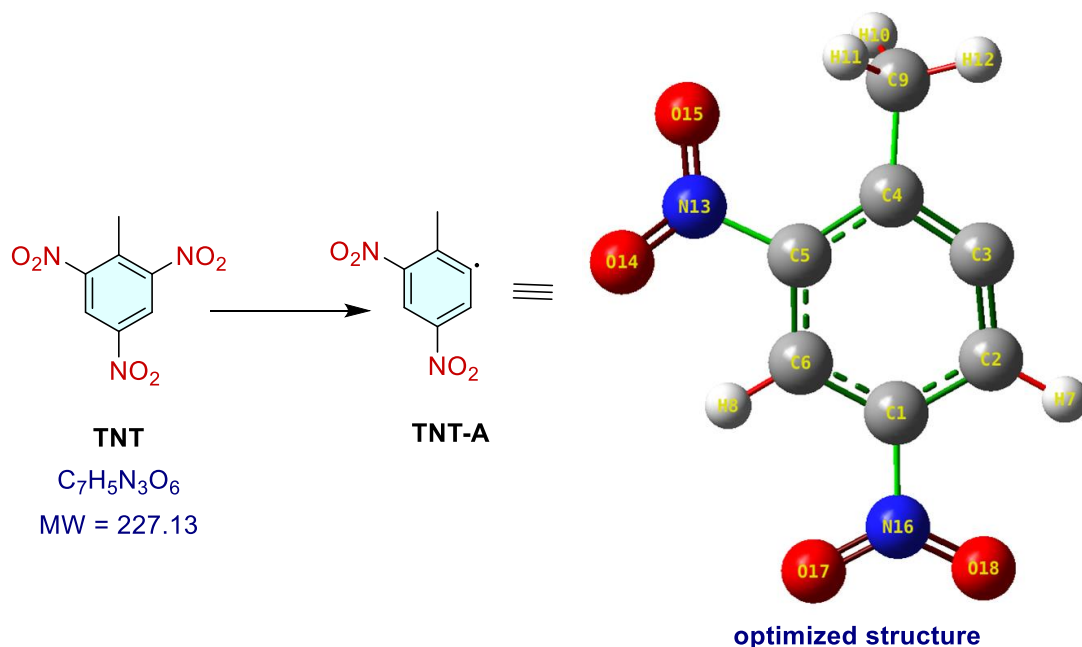

| Center Number | Atomic Symbol | Coordinates (Angstroms) |          |           |
|---------------|---------------|-------------------------|----------|-----------|
|               |               | X                       | Y        | Z         |
| 1             | C             | 1.591948                | 4.601005 | -0.833609 |
| 2             | C             | 2.651918                | 3.762255 | -0.475255 |
| 3             | C             | 3.475031                | 4.257161 | 0.498263  |
| 4             | C             | 3.404740                | 5.468670 | 1.158326  |
| 5             | C             | 2.309046                | 6.254927 | 0.738237  |
| 6             | C             | 1.404086                | 5.835931 | -0.232521 |
| 7             | H             | 2.782896                | 2.798284 | -0.950078 |
| 8             | H             | 0.569865                | 6.463293 | -0.510171 |
| 9             | C             | 4.413441                | 5.826863 | 2.218565  |
| 10            | H             | 5.086213                | 6.608208 | 1.859756  |
| 11            | H             | 3.931608                | 6.214226 | 3.117486  |
| 12            | H             | 4.997731                | 4.943298 | 2.474969  |

|    |   |           |          |           |
|----|---|-----------|----------|-----------|
| 13 | N | 2.058124  | 7.595392 | 1.326884  |
| 14 | O | 0.908768  | 8.009485 | 1.311081  |
| 15 | O | 3.018951  | 8.201511 | 1.780986  |
| 16 | N | 0.640651  | 4.157094 | -1.880540 |
| 17 | O | -0.269412 | 4.917460 | -2.174936 |
| 18 | O | 0.833111  | 3.056879 | -2.378711 |

$E_0 = -679.935543$  Hartree/particle; ZPE = 0.119143 Hartree/particle.

Number of imaginary frequencies at the B3LYP/6-311++G(d,p) level = 0

**Table S23.** Cartesian coordinates (in Å) for the optimized structure of compound **RDX** obtained using the B3LYP/6-311++G(d,p) level of theory

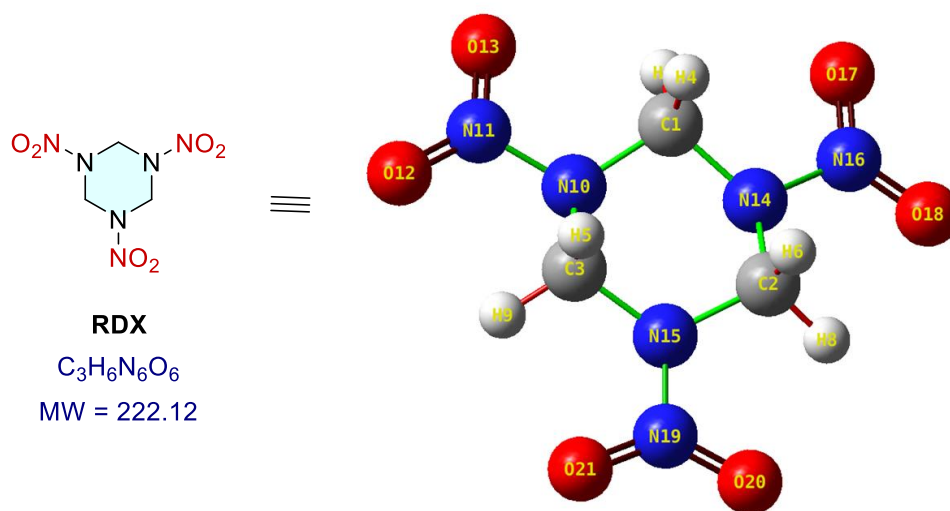

**RDX**  
 $C_3H_6N_6O_6$   
 MW = 222.12

**optimized structure**

| Center Number | Atomic Symbol | Coordinates (Angstroms) |           |           |
|---------------|---------------|-------------------------|-----------|-----------|
|               |               | X                       | Y         | Z         |
| 1             | C             | 1.816365                | -0.180319 | 0.408278  |
| 2             | C             | -0.138655               | 0.573606  | 1.753153  |
| 3             | C             | 1.642655                | 2.196997  | 1.126967  |
| 4             | H             | 2.423146                | -0.515542 | 1.265272  |
| 5             | H             | 2.233384                | 2.081240  | 2.050319  |
| 6             | H             | 0.287267                | 0.308304  | 2.734482  |
| 7             | H             | 2.055562                | -0.778842 | -0.461929 |
| 8             | H             | -1.217239               | 0.483652  | 1.789297  |
| 9             | H             | 1.764945                | 3.201517  | 0.741427  |
| 10            | N             | 2.055917                | 1.229800  | 0.114034  |
| 11            | N             | 3.255253                | 1.519777  | -0.555184 |
| 12            | O             | 3.636600                | 2.676666  | -0.513734 |
| 13            | O             | 3.787506                | 0.595563  | -1.145094 |
| 14            | N             | 0.389907                | -0.288735 | 0.700205  |
| 15            | N             | 0.226962                | 1.935438  | 1.372693  |
| 16            | N             | -0.151688               | -1.581794 | 0.637646  |
| 17            | O             | 0.485893                | -2.410137 | 0.010757  |
| 18            | O             | -1.226661               | -1.749848 | 1.187054  |
| 19            | N             | -0.480820               | 2.961172  | 2.018260  |

|    |   |           |          |          |
|----|---|-----------|----------|----------|
| 20 | O | -1.543401 | 2.652274 | 2.529283 |
| 21 | O | 0.015144  | 4.073872 | 1.979381 |

$E_0 = -897.516473$  Hartree/particle; ZPE = 0.141466 Hartree/particle.

Number of imaginary frequencies at the B3LYP/6-311++G(d,p) level = 0

**Table S24.** Cartesian coordinates (in Å) for the optimized structure of compound **RDX-A** obtained using the B3LYP/6-311++G(d,p) level of theory

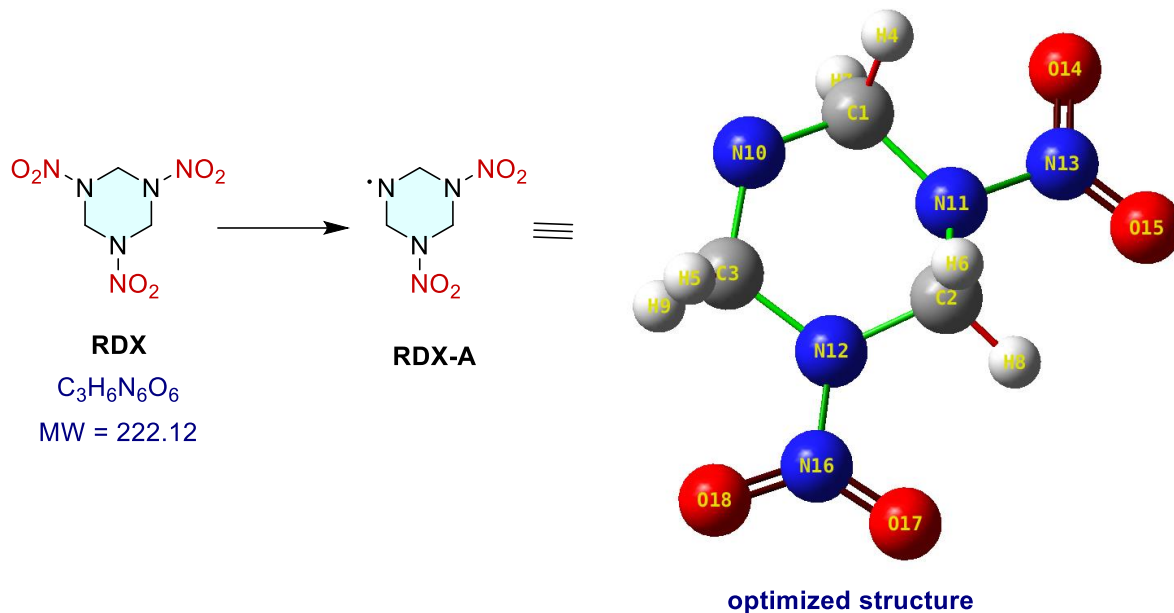

| Center Number | Atomic Symbol | Coordinates (Angstroms) |           |           |
|---------------|---------------|-------------------------|-----------|-----------|
|               |               | X                       | Y         | Z         |
| 1             | C             | 1.729397                | -0.135230 | 0.242168  |
| 2             | C             | -0.066072               | 0.531506  | 1.851363  |
| 3             | C             | 1.586271                | 2.223979  | 1.032743  |
| 4             | H             | 2.363649                | -0.921563 | 0.678771  |
| 5             | H             | 2.148909                | 2.657285  | 1.873329  |
| 6             | H             | 0.492004                | 0.257247  | 2.760821  |
| 7             | H             | 1.751433                | -0.300874 | -0.842540 |
| 8             | H             | -1.128030               | 0.407489  | 2.029541  |
| 9             | H             | 1.546393                | 3.006872  | 0.264488  |
| 10            | N             | 2.330636                | 1.125004  | 0.518705  |
| 11            | N             | 0.339334                | -0.278807 | 0.714634  |
| 12            | N             | 0.208514                | 1.902285  | 1.452293  |
| 13            | N             | -0.218467               | -1.545026 | 0.605552  |
| 14            | O             | 0.340579                | -2.307974 | -0.171027 |
| 15            | O             | -1.222981               | -1.778803 | 1.260573  |
| 16            | N             | -0.480986               | 2.906993  | 2.116230  |
| 17            | O             | -1.475949               | 2.586889  | 2.749105  |
| 18            | O             | -0.036682               | 4.038882  | 1.977731  |

$E_0 = -692.338611$  Hartree/particle; ZPE = 0.124580 Hartree/particle.

Number of imaginary frequencies at the B3LYP/6-311++G(d,p) level = 0

## References

1. M. J. Frisch, G. W. Trucks, H. B. Schlegel, G. E. Scuseria, M. A. Robb, J. R. Cheeseman, G. Scalmani, V. Barone, B. Mennucci, G. A. Petersson, H. Nakatsuji, M. L. Caricato, X., H. P. Hratchian, A. F. Izmaylov, J. Bloino, G. Zheng, J. L. Sonnenberg, M. Hada, M. Ehara, K. Toyota, R. Fukuda, J. Hasegawa, M. Ishida, T. Nakajima, Y. Honda, O. Kitao, H. Nakai, T. Vreven, J. A. Montgomery, Jr., J. E. Peralta, F. Ogliaro, M. Bearpark, J. J. Heyd, E. Brothers, K. N. Kudin, V. N. Staroverov, R. Kobayashi, J. Normand, K. Raghavachari, A. Rendell, J. C. Burant, S. S. Iyengar, J. Tomasi, M. Cossi, N. Rega, N. J. Millam, M. Klene, J. E. Knox, J. B. Cross, V. Bakken, C. Adamo, J. Jaramillo, R. Gomperts, R. E. Stratmann, O. Yazyev, A. J. Austin, R. Cammi, C. Pomelli, J. W. Ochterski, R. L. Martin, K. Morokuma, V. G. Zakrzewski, G. A. Voth, P. Salvador, J. J. Dannenberg, S. Dapprich, A. D. Daniels, Ö. Farkas, J. B. Foresman, J. V. Ortiz, J. Cioslowski, D. J. Fox, Revision D.01 ed., Gaussian, Inc., Wallingford, CT, 2003.
2. P. W. Atkins, *Physical Chemistry*, Oxford University Press, Oxford, 1982.
3. M. S. Westwell, M. S. Searle, D. J. Wales, D. H. Williams, *J. Am. Chem. Soc.*, 1995, **117**, 5013–5015
4. H. Gao, C. Ye, C. M. Piekarski, J. M. Shreeve, *J. Phys. Chem. C*, 2007, **111**, 10718–10731.
5. O. V. Dolomanov, L. J. Bourhis, R. J. Gildea, J. A. K. Howard, H. Puschmann, *J. Appl. Cryst.* 2009, **42**, 339-341.
6. G. M. Sheldrick, *Acta Cryst.*, 2008, **A64**, 112-122.
7. S. Parsons, *Acta Cryst.*, 2003, **D59**, 1995-2003.
8. CrysAlisPro (ROD), Rigaku Oxford Diffraction, Poland.
9. CrysAlisPro Software System, Rigaku Oxford Diffraction, 2020.
10. G. M. Sheldrick, *Acta Cryst.*, 2015, **C71**, 3-8.
11. G. M. Sheldrick, *Acta Cryst.*, 2015, **A71**, 3-8.
